# Supplementary material
Source: ML conference proceedings conference paper supplement (https://openreview.net/forum?id=Zsb27kqtX5)
Supplement: supplementary_material [file attachment]

# ON THE COLLAPSE OF GENERATIVE PATHS: A CRITERION AND CORRECTION FOR DIFFUSION STEERING

**Anonymous authors**

Paper under double-blind review

## ABSTRACT

Inference-time steering enables pretrained diffusion/flow models to be adapted to new tasks without retraining. A widely used approach is the ratio-of-densities method, which defines a time-indexed target path by reweighting probability-density trajectories from multiple models with positive, or in some cases, negative exponents. This construction, however, harbors a critical and previously unformalized failure mode: Marginal Path Collapse, where intermediate densities become non-normalizable even though endpoints remain valid. Collapse arises systematically when composing heterogeneous models trained on different noise schedules or datasets, including a common setting in molecular design where *de-novo*, conformer, and pocket-conditioned models must be combined for tasks such as flexible-pose scaffold decoration. We provide a novel and complete solution for the problem. First, we derive a simple path existence criterion that predicts exactly when collapse occurs from noise schedules and exponents alone. Second, we introduce Adaptive path Correction with Exponents (ACE), which extends Feynman–Kac steering to time-varying exponents and guarantees a valid probability path. On a synthetic 2D benchmark and on flexible-pose scaffold decoration, ACE eliminates collapse and enables high-guidance compositional generation, improving distributional and docking metrics over constant-exponent baselines and even specialized task-specific scaffold decoration models. Our work turns ratio-of-densities steering with heterogeneous experts from an unstable heuristic into a reliable tool for controllable generation.

## 1 INTRODUCTION

Generative models based on stochastic interpolants, such as diffusion models (Ho et al., 2020; Song et al., 2021) and flow matching (Lipman et al., 2023), have become state-of-the-art systems for creation and scientific discovery Rombach et al. (2022); Schiff et al. (2025); Xie et al. (2024). These models learn to transform noise at  $t = 0$  into complex data at  $t = 1$  by following a learned probability path defined by ordinary or stochastic differential equations. A key to their practical success is *inference-time control*: the ability to steer pretrained models toward new goals without retraining. Concretely, we are interested in problems where one wishes to impose several constraints by reusing separate models for each constraint rather than retraining a single monolithic model. This increasingly involves composing multiple pretrained experts, making robust steering a central bottleneck for progress (Skreta et al., 2025b; Mark et al., 2025).

A widely used steering mechanism is the *ratio-of-densities*  $p(x)^{\gamma_1}/q(x)^{\gamma_2}$ , which reweights the probability landscape to favor modes of  $p$  while suppressing those of  $q$ . This construction arises naturally in Bayesian model composition and admits many existing guidance techniques as special cases. For example, classifier-free guidance (Ho & Salimans, 2021) can be written as targeting a distribution proportional to  $p(x | y)^\gamma/p(x)^{\gamma-1}$ . In Appendix D.1, we show that reward-tilted sampling, product-of-experts conditioning, and contrastive decoding also fit a common ratio-of-densities template whose intermediate densities must remain normalizable along the flow.

In settings where experts share the same noise schedule (e.g., CFG with jointly trained conditional/unconditional pairs), this approach is typically stable. However, many scientific applications involve composing *heterogeneous* models (i.e., trained on diverse datasets, modalities, and noise schedules) where modularity is highly advantageous for flexibility and cost-efficiency. For exam-

Reviewer  
gBQy,  
naNy

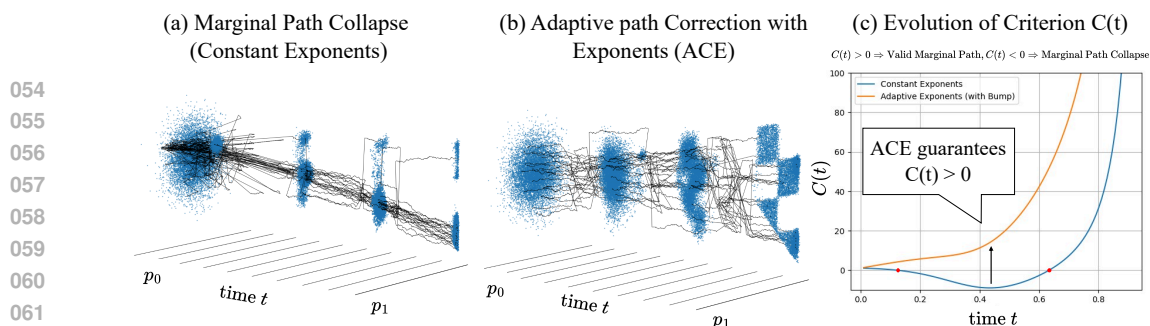

Figure 1: **Marginal Path Collapse and Our Solution (ACE)**. (a) The heuristic steering path using constant exponents starts correctly but then diverges into nonsense towards the end. (b) Using the same pretrained models, ACE uses adaptive exponent schedules (Bump= 30 visualized) to guarantee the path existence criterion  $C(t) > 0$  for all  $t$ , enabling smooth transport to the target. (c) Graph of  $C(t)$  for the constant schedule dips below zero, while ACE guarantees positivity for all time.

ple, in molecular design, *scaffold decoration* (Guan et al., 2009) starts from a known “scaffold” fragment that binds a protein and asks the model to generate side chains and poses that improve properties while preserving binding. This task naturally combines unconditional de-novo (DN) models (Hoogeboom et al., 2022a; Ketata et al., 2024), conformer (CONF) models for 3D geometry (Xu et al., 2022; Hassan et al., 2024), and pocket-conditioned structure-based drug-design (SBDD) models (Schneuing et al., 2024; Huang et al., 2024b) all trained on different datasets and noise schedules.

Moreover, a growing body of work on task-specific and adaptive noise scheduling (Vignac et al., 2023; Lee et al., 2024; Choi et al., 2025; Seo et al., 2025) and our own survey of DN/CONF/SBDD models (Appendix E.3, Tables E.2–E.4) show that different tasks and modalities require different allocations of noise across the trajectory, reinforcing that heterogeneous scheduler combinations are not only common but often *necessary* in practice.

**The Hidden Flaw: Uncovering Marginal Path Collapse.** Despite its apparent simplicity, ratio-of-densities steering can fail in heterogeneous settings. We identify a critical and frequent failure mode, *Marginal Path Collapse*, which occurs when the intermediate densities along the stochastic interpolant become non-normalizable and cease to exist, even though the endpoint distributions at  $t = 0$  and  $t = 1$  are perfectly valid (Figure. 1). Collapse arises from a mathematical imbalance between the steering exponents and the shrinking variance of the interpolant as  $t \rightarrow 1$ . When experts have different noise schedules or dimensionalities, their contributions contract at incompatible rates, causing the resulting ratio to grow rather than decay at infinity, violating normalizability. We show that this scenario is *systematic* when composing heterogeneous models trained with common schedules such as linear, cosine, or sigmoids, and, combined with the task-specific scheduler trends above, this implies that many realistic scientific workflows will routinely enter such invalid regions.

**SDE/ODE samplers and Feynman–Kac correctors** assume that the guided path defines a normalizable density at every timestep. When an intermediate density becomes non-normalizable, then its score ceases to exist. The sampler still evolves particles under a well-posed SDE/ODE, but the resulting flow transports a different density path rather than the intended one. Consequently, the terminal distribution at  $t = 1$  no longer matches the target distribution.

**A Framework for Guaranteed Path Stability.** In this work, we provide a comprehensive solution to *Marginal Path Collapse*, transforming ratio-of-densities steering into a reliable and principled framework. Our contributions follow a clear “Diagnosis-and-Solution” pipeline:

1. **Diagnosis: Path Existence Criterion.** We derive a rigorous and easy-to-compute criterion that predicts exactly when collapse occurs from the noise schedules and exponents alone. This criterion explains why constant-exponent heuristics appear stable in shared-schedule settings yet fail under heterogeneous compositions.
2. **Solution: Adaptive Path Correction with Exponents (ACE).** Building on this diagnosis, we extend the Feynman–Kac PDE to support time-varying exponents. This allows ACE to dynamically adjust steering weights throughout generation to ensure the path existence criterion is satisfied at all times. ACE provably guarantees a valid probability path whenever the endpoints are valid.

**Validation.** On a synthetic 2D checkerboard benchmark, ACE eliminates collapse and reduces distributional error by over  $5\times$ . On flexible-pose scaffold decoration (Chen et al., 2025; Xie et al., 2024; Ghorbani et al., 2024), a practical molecular design task requiring heterogeneous DN/CONF/SBDD

Reviewer  
gBQy,  
naNy

Reviewer  
gBQy,  
naNy

Table 1: Comparison of inference-time control methodologies. Unlike heuristics (e.g., CFG) or FK (Skreta et al., 2025a), our framework provides a principled criterion with adaptive correction (ACE), guaranteeing valid paths even under heterogeneous or time-varying settings.

| Methodology                       | Primary Goal                   | Handles Heterogeneity? | Handles Time-Varying / Negative Exponents? | Guarantees Path Existence? |
|-----------------------------------|--------------------------------|------------------------|--------------------------------------------|----------------------------|
| Heuristic Guidance (e.g., CFG)    | Improve sample quality         | heuristically          | heuristically                              | ✗                          |
| Feynman–Kac Correctors (FKC)      | Provide unbiased samples       | ✗                      | ✗                                          | ✗                          |
| <b>Our Work (Criterion + ACE)</b> | Guarantee a valid, stable path | ✓                      | ✓                                          | ✓                          |

composition, standard steering fails at high guidance scales due to path collapse, whereas ACE remains stable and discovers molecules with substantially improved docking scores. **On compositional image generation, we show that even when the path-existence criterion holds, time-varying exponents can sharpen intermediate distributions and improve sample quality in practice (+9.57%*p* on COCO-MIG), suggesting ACE as a general steering paradigm rather than only a fix for collapse.**

Reviewer  
naNy

Our work provides a simple safeguard against a common failure mode and establishes the theoretical foundations for safely composing heterogeneous generative models, as summarized in Table 1.

## 2 METHOD

### 2.1 PRELIMINARIES: HETEROGENEOUS PRODUCT/RATIO-OF-DENSITIES

**Stochastic Interpolants and Probability Paths.** We begin by formalizing the notion of a probability path. A *probability path* (or *expert*)  $\{q_t\}_{t \in [0,1]}$  on  $\mathbb{R}^d$  is a family of densities with respect to the Lebesgue measure such that  $q_t$  is normalizable to 1 for every  $t$ . In practice, paths are often generated by a *stochastic interpolant* of the form  $X_t = \alpha_t X_0 + \beta_t X_1$ ,  $t \in [0, 1]$ , where  $X_0 \sim \mathcal{N}(0, I_d)$ ,  $X_1 \sim q_1$  (target density), and  $\alpha_t, \beta_t$  are nonnegative differentiable noise schedules satisfying boundary conditions  $\alpha_0 = \beta_1 = 1, \alpha_1 = \beta_0 = 0$ . The law of  $X_t$  defines  $q_t$ . Stochastic interpolants can express both diffusion and flow matching by choosing proper  $\alpha_t, \beta_t$  (Albergo et al., 2023).

**Heterogeneous Dimensionalities.** Given  $n$  heterogeneous experts  $\{q_t^{(i)}\}_{t \in [0,1]}$ ,  $i = 1, \dots, n$  each supported on  $\mathbb{R}^{d_i}$  and exponents  $\gamma_i : [0, 1] \rightarrow \mathbb{R}$ , we embed them into a common ambient space  $\mathbb{R}^d$  with  $d = \max_{1 \leq i \leq n} d_i$ , via coordinate projections and canonical embeddings. For each expert  $i$ , let  $I_i \subset \{1, \dots, d\}$  denote the coordinates it acts on. The projection  $\pi_i : \mathbb{R}^d \rightarrow \mathbb{R}^{d_i}$  selects components in  $I_i$ , and the canonical embedding  $\iota_i : \mathbb{R}^{d_i} \rightarrow \mathbb{R}^d$  inserts them back (zeroing the rest), satisfying  $\pi_i \circ \iota_i = \text{Id}_{\mathbb{R}^{d_i}}$ . The lifted densities are  $\tilde{q}_t^{(i)} := q_t^{(i)} \circ \pi_i$ , and the heterogeneous *product/ratio-of-densities* is

$$h_t(x) := \prod_{i=1}^n (\tilde{q}_t^{(i)}(x))^{\gamma_i(t)}, \quad x \in \mathbb{R}^d. \quad (1)$$

We say that the family  $\{h_t\}_{t \in [0,1]}$  has the *path existence property* if  $h_t \in L^1(\mathbb{R}^d)$ ,  $\forall t \in [0, 1]$ . When so,  $p_t^* = h_t/Z_t$  is the corresponding normalized probability path with  $Z_t = \int_{\mathbb{R}^d} h_t(x) dx$ .

**Heterogeneous Noise Schedules.** Throughout the paper, we will assume that each expert path  $\{q_t^{(i)}\}_{t \in [0,1]}$  is generated by its own interpolant

$$X_t^{(i)} = \alpha_t^{(i)} X_0^{(i)} + \beta_t^{(i)} X_1^{(i)} \quad t \in [0, 1] \quad (2)$$

where  $X_0^{(i)} \sim q_0^{(i)} = \mathcal{N}(0, I_{d_i})$ ,  $X_1^{(i)} \sim q_1^{(i)}$ . When  $\alpha_t^{(i)} \neq \alpha_t^{(j)}$  for some  $i \neq j$ , we refer to  $h_t$  as having *heterogeneous noise schedules*.

**Path existence requirement.** SDE/ODE samplers and Feynman–Kac correctors assume that  $p_t^* = h_t/Z_t$  exists at every timestep, requiring the  $h_t$  to be integrable. If  $h_t$  becomes non-normalizable (Marginal Path Collapse), then  $p_t^*$  and its score cease to exist. The sampler still solves a well-posed ODE/SDE, but the resulting flow transports a different density path  $\{p_t'\}$  rather than the intended  $\{p_t^*\}$ . The terminal distribution  $p_1'$  produced by the sampler no longer matches the desired target  $p_1^*$  (see Remark in Appendix A.2).

Reviewer  
gBQy,  
naNy

### 2.2 MARGINAL PATH COLLAPSE

Even if both endpoints  $h_0$  and  $h_1$  are integrable, *path-existence* is not guaranteed. A simple Gaussian example demonstrates the phenomenon (Figure 2).

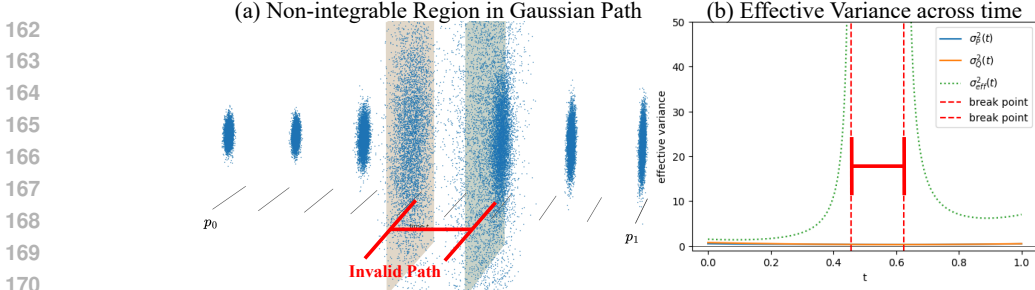

Figure 2: **Non-integrable Region in the ratio-of-Gaussians example (Eq. 3).** Although the ratio is well-defined at the endpoints, the intermediate variance explodes, causing *Marginal Path Collapse*.

**Why collapse occurs.** Let  $h_t(x) = q_t^{(1)} q_t^{(2)} / q_t^{(3)} q_t^{(4)}$ , where each component is a Gaussian path<sup>1</sup> under the linear interpolant  $X_t = (1 - t)X_0 + tX_1$ :

$$\begin{aligned} q_t^{(1)} &= \mathcal{N}\left(0, \left((1-t)^2 + \frac{1}{2}t^2\right)I\right), & q_t^{(2)} &= \mathcal{N}\left(0, \left((1-t)^2 + 7t^2\right)I\right), \\ q_t^{(3)} &= \mathcal{N}\left(0, \left(\frac{3}{2}(1-t)^2 + t^2\right)I\right), & q_t^{(4)} &= \mathcal{N}\left(0, \left(\frac{3}{2}(1-t)^2 + t^2\right)I\right). \end{aligned} \quad (3)$$

At  $t = 0$  and  $t = 1$ , the ratio  $h_t \propto \mathcal{N}(0, \sigma_{\text{eff}}^2(t)I)$  for some finite  $\sigma_{\text{eff}}^2(t)$ , making it integrable. However, by directly computing the ratio at  $t = 0.5$ ,  $h_t(x) \geq C \cdot \exp(+0.01\|x\|^2)$ , for some constant  $C > 0$ , which is not integrable on  $\mathbb{R}^d$ . In fact, we can plot the probability path  $p_t^*$  and its effective variance  $\sigma_{\text{eff}}^2(t)$  across time as in Figure 2, showing that intermediate paths do not exist despite valid endpoints. We analyze the more general Gaussian mixture case in Appendix B.4.

The Gaussian example provides a crucial intuition: *Marginal Path Collapse* occurs when the variances of the numerator terms shrink "slower" than the variances of the denominator terms. This creates a temporary, fatal imbalance where the combined density becomes explosive rather than decaying at infinity. While this closed-form example is illustrative, most real-world models, especially those operating on complex data like molecules or images, involve non-Gaussian and compactly supported target distributions where such a direct variance calculation is impossible.

A natural and pressing question arises: can we find a general criterion that diagnoses the risk of collapse for these more complex cases, without needing a closed-form expression for the path?

### 2.3 PATH EXISTENCE CRITERION FOR COMPACTLY SUPPORTED DENSITIES

Compactly supported distributions are common in scientific applications, where data are bounded by physical constraints. In this setting, we can derive a clean criterion for path existence.

**Theorem 2.1** (Path Existence Test for Compactly Supported Densities). *For each  $i = 1, \dots, n$ , let  $\gamma_i(t), \alpha_t^{(i)}, \{q_t^{(i)}\}_{t \in [0,1]}$ ,  $h_t(x)$  be as defined in Eq. 1 and 2. We only assume additionally that  $q_1^{(i)}$  has compact support for all  $i = 1, \dots, n$ .*

*If  $h_1(x)$  is integrable and for every coordinate  $k \in \{1, \dots, d\}$  and all  $t \in [0, 1)$ ,*

$$C_k(t) := \sum_{i: k \in I_i} \frac{\gamma_i(t)}{(\alpha_t^{(i)})^2} > 0, \quad (4)$$

*then  $\{h_t\}_{t \in [0,1]}$  has the path existence property. Conversely, if there exists a coordinate  $k^* \in \{1, \dots, d\}$  and  $t^* \in [0, 1)$  such that  $C_{k^*}(t^*) < 0$ , then  $\{h_t\}_{t \in [0,1]}$  is not integrable at  $t^*$  (*Marginal Path Collapse*).*

We provide a proof in Appendix B.1. This theorem provides a tractable checklist: to certify path existence, one only needs to verify endpoint integrability and the positivity of the coefficients  $C_k(t)$ , which in practice can be checked on the discrete timesteps used by the sampler.

<sup>1</sup>A Gaussian path from  $q_0 = \mathcal{N}(0, \sigma_1 I)$  to  $q_1 = \mathcal{N}(0, \sigma_2 I)$  has the closed form expression  $q_t = \mathcal{N}(0, (\sigma_1(1-t)^2 + \sigma_2 t^2)I)$

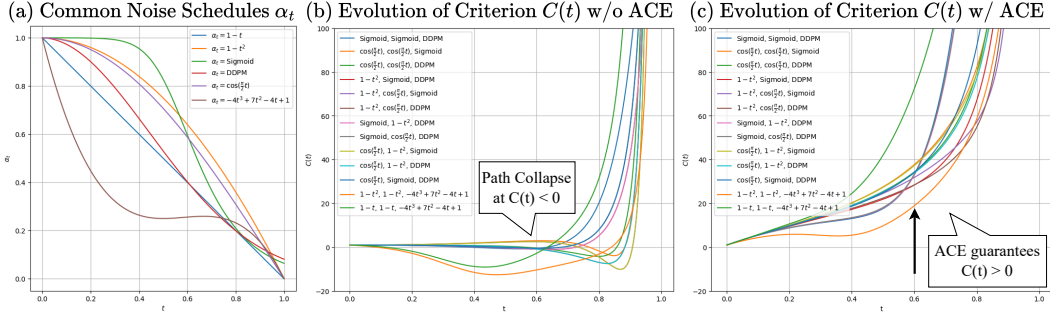

Figure 3: **Common noise schedules and Marginal Path Collapse.** (a) Representative noise schedules  $\alpha_t$  used in modern diffusion and flow-matching models. (b) Path-existence criterion  $C(t)$  (Eq. 4) for several heterogeneous three-expert compositions  $h_t = q_t^{(1)} q_t^{(2)} / q_t^{(3)}$ , formed from these schedules. Many combinations enter a region where  $C(t) < 0$ , implying non-normalizable intermediate densities. (c) Under ACE with a bump function (here  $B = 50$ ), the corrected exponents ensure  $C(t) > 0$  for all  $t$ , guaranteeing path existence.

Figure 3 illustrates the effect of this test on standard noise schedules. Panel (b) plots  $C(t)$  for several heterogeneous compositions  $h_t = q_t^{(1)} q_t^{(2)} / q_t^{(3)}$  built from linear, cosine, DDPM-style, and related schedules, revealing that many realistic combinations enter a region with  $C(t) < 0$ . This shows that widely used heuristic schedules can induce Marginal Path Collapse even when each individual expert is well behaved. Panel (c) shows that applying ACE with a bump function restores  $C(t) > 0$  throughout the trajectory, converting these invalid heuristic paths into valid probability paths.

This discovery motivates the central goal of our work: to develop a method that can correct any given set of schedules to ensure the path existence criterion is always satisfied, thereby transforming unstable heuristics into a robust, guaranteed methodology. We introduce this method next.

#### 2.4 ADAPTIVE PATH CORRECTION WITH EXPONENTS: BUMP FUNCTION PROTOCOL

We develop our correction protocol, ACE, by first constructing a valid exponent schedule  $\tilde{\gamma}_i(t)$  and then deriving the sampling dynamics that follow this corrected path.

In application scenarios, we need control over the initial distribution  $p_0^* = \prod_{i=1}^n (p_0^{(i)})^{\gamma_i(0)} / Z_0$  (usually fixed to  $\mathcal{N}(0, I)$ ) and the target distribution  $p_1^* = \prod_{i=1}^n (p_1^{(i)})^{\gamma_i(1)} / Z_1$ . However, we do not need to fix the intermediate marginals  $p_t^*$ ,  $t \in (0, 1)$ . The idea is to choose an appropriate  $\tilde{\gamma}_i(t)$  that preserves the original exponent values at the beginning and end,  $\tilde{\gamma}_i(0) = \gamma_i(0)$ ,  $\tilde{\gamma}_i(1) = \gamma_i(1)$ , while ensuring the intermediate densities are all normalizable.

**Theorem 2.2** (Adaptive Exponents with Bump Functions). *Let a set of noise schedules  $\{\alpha_t^{(i)}\}$  and exponent boundary values  $\{\gamma_i(0), \gamma_i(1)\}$  be given. Assume that the criterion  $C_k(t)$  (Eq. 4) is positive at the boundaries. That is,  $C_k(0) > 0$  and  $\lim_{t \rightarrow 1^-} C_k(t) > 0$  for all coordinates  $k$ . Then, there exists a set of differentiable functions  $\{\tilde{\gamma}_i(t)\}$  such that  $\tilde{\gamma}_i(0) = \gamma_i(0)$ ,  $\tilde{\gamma}_i(1) = \gamma_i(1)$  for all  $i$ , and the criterion  $C_k(t) > 0$  is satisfied for all  $k$  and  $t \in [0, 1)$ .*

We provide a constructive proof in Theorem B.2 showing that there always exists a positive constant  $B > 0$  such that choosing one index  $j$  and changing  $\tilde{\gamma}_j(t) = \gamma_j(t) + Bt(1-t)$  (adding a bump function) now satisfies the path existence criterion for all  $t$ . We call this the bump function protocol.

Now we have established "what" we are going to sample from. The next question is "how" to sample from the corrected probability path. The weighted SDE below is derived by extending the **Feynman-Kac Correctors (FKC)** (Skreta et al. (2025a), Alg. 2) to time-dependent exponents  $\gamma_i(t)$ .

For each  $i = 1, \dots, n$ , let  $\gamma_i(t) : \mathbb{R} \rightarrow \mathbb{R}$  be differentiable with respect to  $t$  and  $\{q_t^{(i)}\}_{t \in [0, 1]}$  denote probability paths (defined in Eq. 1–2) associated with the stochastic differential equation (SDE):

$$X_0^{(i)} \sim q_0^{(i)}, \quad dX_t^{(i)} = \left( v_t^{(i)}(X_t^{(i)}) + \frac{(\sigma_t^{(i)})^2}{2} \nabla \log q_t^{(i)}(X_t^{(i)}) \right) dt + \sigma_t^{(i)} dW_t^{(i)} \quad (5)$$

Reviewer  
naNyJeuE

where  $W_t^{(i)}$  is a Wiener process in  $\mathbb{R}^{d_i}$ ,  $s_t^{(i)}(x^{(i)}) := \nabla_{x^{(i)}} \log q_t^{(i)}(x^{(i)})$ ,  $x^{(i)} \in \mathbb{R}^{d_i}$  is the score function, and the fields  $v_t^{(i)}, s_t^{(i)} \in C^1$  are measurable. We embed vector fields  $\tilde{v}_t^{(i)} : \mathbb{R}^{d_i} \rightarrow \mathbb{R}^{d_i}$  in  $\mathbb{R}^d$  via  $\tilde{v}_t^{(i)} = \iota_i \circ v_t^{(i)} \circ \pi_i : \mathbb{R}^d \rightarrow \mathbb{R}^d$ . The following theorem establishes our sampling algorithm:

**Theorem 2.3** (ACE: Adaptive path Correction with time-dependent Exponents). *If the path existence criterion (Eq. 4) holds, then for any differentiable vector field  $v_t^* : \mathbb{R}^d \rightarrow \mathbb{R}^d$ , the stochastic process given by the following weighted SDE/ODE with  $s_t^*(X_t) := \sum_{i=1}^n \gamma_i(t) \tilde{s}_t^{(i)}(X_t)$ ,  $D_t^{(i)}(X_t) := -\nabla \cdot \tilde{v}_t^{(i)}(X_t) + (v_t^*(X_t) - \tilde{v}_t^{(i)}(X_t)) \cdot \tilde{s}_t^{(i)}(X_t)$ :*

$$dX_t = \left( v_t^*(X_t) + \frac{\sigma_t^2}{2} s_t^*(X_t) \right) dt + \sigma_t dW_t \quad (6)$$

$$d \log \tilde{q}_t^{(i)}(X_t) = \left( D_t^{(i)} + \frac{\sigma_t^2}{2} \left( s_t^* \cdot \tilde{s}_t^{(i)} + \nabla \cdot \tilde{s}_t^{(i)} \right) \right) dt + \sigma_t \tilde{s}_t^{(i)} \cdot dW_t \quad (7)$$

$$d \log w_t(X_t) = \left[ \nabla \cdot v_t^*(X_t) + \sum_{i=1}^n \dot{\gamma}_i(t) \log \tilde{q}_t^{(i)}(X_t) + \sum_{i=1}^n \gamma_i(t) D_t^{(i)}(X_t) \right] dt \quad (8)$$

with initial values  $X_0 \sim p_0^*$ ,  $w_0 = \mathbf{1}$ ,  $\log q_0^{(i)}(X_0)$  follows the probability path

$$p_t^*(x) = \frac{1}{Z_t} \prod_{i=1}^n \left( \tilde{q}_t^{(i)}(x) \right)^{\gamma_i(t)}, \quad x \in \Omega_t$$

where  $t \in [0, 1]$ ,  $\Omega_t := \text{supp}(p_t^*)$  and  $Z_t$  is the normalizing constant only dependent on  $t$ .

We provide the full derivation and proof in Theorem A.1. Note we can minimize costly divergence computations when simulating the SDE in Theorem 2.3 by choosing  $v_t^* = \sum_{i=1}^n \gamma_i(t) \tilde{v}_t^{(i)}$ . We use this choice in our scaffold decoration experiment for better numeric stability and faster inference.

**Practical Remark.** Theorem 2.3 characterizes the weighted SDE whose marginal  $p_t^*$  follows the corrected ratio-of-densities path. In practice, we implement this dynamics using a particle system with importance weights: at each step we propagate particles under the drift and diffusion in Eqs. 6–7, update their log-weights via Eq. 8, and trigger a resampling step whenever the effective sample size (ESS) falls below a threshold. During resampling, high-weight samples are duplicated and low-weight ones are removed in proportion to their weights. As illustrated in Figure 4, this procedure eliminates out-of-distribution trajectories in ACE, whereas the no-resampling heuristic (NR) leaves invalid samples in the batch. The complete algorithm for Theorem 2.3 is provided in Algorithm 1.

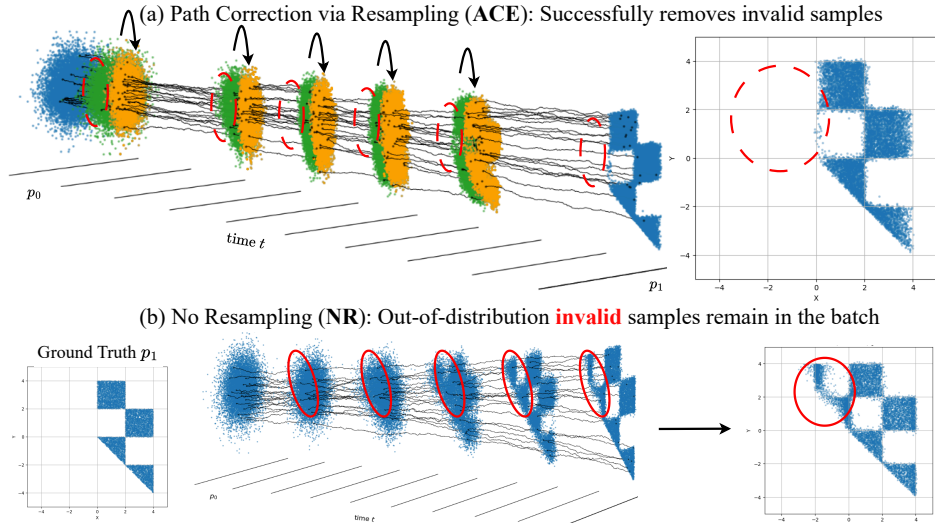

Figure 4: **Visualization of the sampling trajectories.** (a) ACE appropriately assigns weights to valid samples such that at each resampling step (green-to-orange), invalid samples are discarded. (b) No resampling (NR), a common heuristic (e.g., CFG), has no corrective mechanism that removes out-of-distribution samples.

## 2.5 APPLICATION: FLEXIBLE-POSE SCAFFOLD DECORATION

We now demonstrate the practical necessity of our framework on *flexible-pose scaffold decoration*, a task that illustrates all components of the heterogeneous ratio-of-densities setting developed so far. Here the goal is to generate molecules  $\mathcal{M} = (\mathcal{M}^{\text{sc}}, \mathcal{M}^{\text{R}})$  that preserve a given scaffold bond topology  $\mathcal{T}^{\text{sc}}$  and stably bind to a protein pocket  $\mathcal{P}$ , while allowing the scaffold’s 3D pose to adapt within the pocket (Figure 5). This naturally yields the heterogeneous ratio-of-densities target

$$p(\mathcal{M} | \mathcal{T}^{\text{sc}}, \mathcal{P}) \underset{\text{Bayes}}{\propto} \frac{p(\mathcal{M}^{\text{sc}} | \mathcal{T}(\mathcal{M}^{\text{sc}}) = \mathcal{T}^{\text{sc}}) p(\mathcal{M} | \mathcal{M} \leftrightarrow \mathcal{P})}{p(\mathcal{M}^{\text{sc}})}, \quad (9)$$

where  $\mathcal{M} \leftrightarrow \mathcal{P}$  denotes stable binding<sup>2</sup> and  $\mathcal{T}(\cdot)$  extracts molecular topology (Appendix E.1).

Following classifier-free guidance, we introduce a guidance scale  $\omega \geq 1$ ,

$$p_\omega(\mathcal{M}) \propto p(\mathcal{M}) \left( \frac{p(\mathcal{M} | \mathcal{T}^{\text{sc}}, \mathcal{P})}{p(\mathcal{M})} \right)^\omega, \quad (10)$$

so that larger  $\omega$  enforces stronger scaffold and pocket conditioning. Crucially, this formulation (Eq. 9–10) decomposes into three pretrained diffusion experts:

- ( $q^{(1)}$  and  $q^{(2)}$ ) Unconditional de-novo model (DN) for  $p(\mathcal{M}^{\text{sc}})$  and  $p(\mathcal{M})$
- ( $q^{(3)}$ ) Topology-conditioned conformer model (CONF) for  $p(\mathcal{M}^{\text{sc}} | \mathcal{T}^{\text{sc}})$
- ( $q^{(4)}$ ) Pocket-conditioned SBDD model for  $p(\mathcal{M} | \mathcal{P})$

Writing the four corresponding factors with exponents  $\gamma_1(t) = -\omega$ ,  $\gamma_2(t) = -(\omega - 1)$ ,  $\gamma_3(t) = \omega$ ,  $\gamma_4(t) = \omega$  shows that Eq. 10 is exactly a *heterogeneous* ratio-of-densities composition of the form  $p_t^* \propto \prod_i (q_t^{(i)})^{\gamma_i(t)}$  studied in Section 2.1.

Because existing DN, CONF, and SBDD experts are trained with *heterogeneous noise schedules* (see survey Tables E.2, E.3, and E.4), the constant-exponent path obtained from Eq. 10 violates the path-existence criterion (Theorem 2.1) for guidance scales  $\omega > 1.1$ , resulting in Marginal Path Collapse. Therefore, to raise  $\omega$  while preserving path existence, we construct an *ACE-corrected* exponent schedule using Theorem 2.2. In practice, we apply a bump function of the form  $B(t) = 30t(1-t)$  to one of the positive-exponent terms (here  $\gamma_4$ ), which suffices to ensure  $C_k(t) > 0$  for all  $t$  and thereby guarantees a valid probability path. Finally, by simulating the importance-weighted SDE of Theorem 2.3, we obtain unbiased samples from the corrected path, and hence from the desired target distribution  $p_\omega(\mathcal{M})$  in Eq. 10.

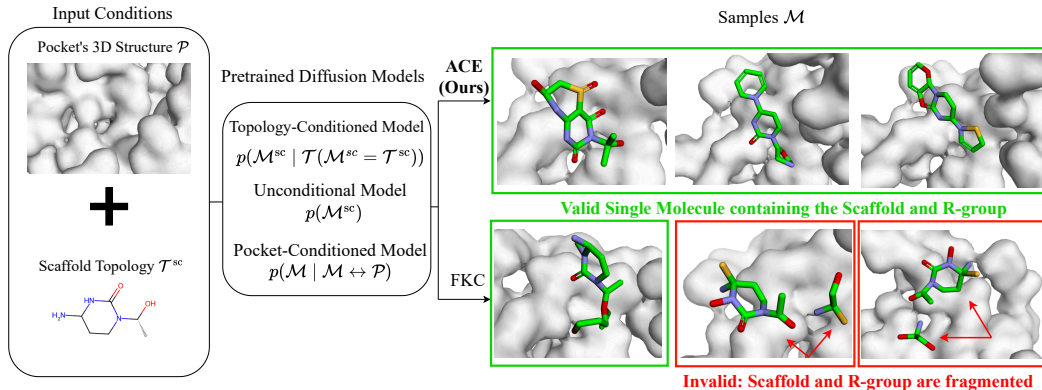

Figure 5: **Diffusion Steering Framework for Flexible-Pose Scaffold Decoration.** Qualitative results reveal that ACE, successfully modeling the ratio-of-density path, generates valid molecules containing the scaffold topology, while FKC (constant exponent baseline) generates invalid, fragmented molecules as a result of following an ill-defined probability path.

<sup>2</sup>Defined via docking energy  $U^{\text{Dock}}(\mathcal{M} \leftrightarrow \mathcal{P}) < \tau^{\text{Dock}}$ .

### 3 EXPERIMENTS

**Synthetic Checker Dataset.** We construct a synthetic benchmark that mirrors the heterogeneous conditioning structure encountered in our molecular task (Eq. 9). In both settings, one condition acts *locally* on a subset of variables (e.g., scaffold topology  $A$  affecting only  $\mathcal{M}^{\text{sc}}$ ), while another acts *globally* on the full configuration (e.g., pocket binding  $B$  affecting  $(\mathcal{M}^{\text{sc}}, \mathcal{M}^{\text{R}})$ ). As discussed in Section E.1 and illustrated in Figure E.2, this form of heterogeneous conditioning is pervasive in scientific problems such as scaffold decoration, linker generation, and protein–protein glue design.

To create the simplest possible analog of Eq. 9, we let  $X$  and  $Y$  be 1D variables having joint prior  $(X, Y) \sim p_{\text{Checker}}$  and impose two constraints:  $A = \{X \geq 0\}$  (local constraint on  $X$ ) and  $B = \{X + Y \geq 0\}$  (global constraint coupling  $(X, Y)$ ). This induces the heterogeneous factorization

$$p(X, Y | A, B) \underset{\text{Bayes}}{\propto} p(X, Y, B | A) \underset{\text{Bayes}}{\propto} p(X | A)p(Y, B | A, X) \underset{(*)}{\propto} p(X | A) \frac{p(X, Y | B)}{p(X)} \quad (11)$$

For  $(*)$ , we use the fact that once  $X$  is given,  $A$  has no effect on  $Y, B$ , which can be expressed by  $A \perp Y, B | X$ , implying  $p(Y, B | A, X) = p(Y, B | X)$ . Thus, exactly as in Eq. 9, the target distribution naturally decomposes into *three heterogeneous experts*: a 1D expert for  $p(X | A)$ , a 2D expert for  $p(X, Y | B)$ , and a 1D expert for  $p(X)$ .

To test the theoretical phenomenon identified by our path-existence criterion, we deliberately assign these experts a set of noise schedules drawn from Figure 3, many of which are known to induce *Marginal Path Collapse*. In Table 2, we use  $\alpha_t^{(1)} = \alpha_t^{(2)} = 1 - t$ ,  $\alpha_t^{(3)} = -4t^3 + 7t^2 - 4t + 1$ . Importantly, the collapse behavior we observe here is *not* specific to this choice: Figures E.6–E.11 evaluate *realistic and widely used* schedules (DDPM, sigmoid, linear, cosine, polynomial) and show that the same failure patterns arise, confirming that the phenomenon is not an adversarial artifact. See implementation details and hyperparameter study in Appendix C.

**Flexible-Pose Scaffold Decoration.** We evaluate ACE on a realistic scientific task requiring heterogeneous DN/CONF/SBDD composition. Dataset details, implementation, and metrics appear in Appendix C.2. Briefly, we combine pretrained models EDM (Hoogeboom et al., 2022b) as DN, GeoDiff (Xu et al., 2022) as CONF, and DiffSBDD (Schneuing et al., 2024) as SBDD as defined in Section 2.5. We evaluate on subsets of CrossDock (Francoeur et al., 2020): CrossDock-Weak and CrossDock-SBDD. As diffusion-steering baselines we adopt NR and FKC (Skreta et al., 2025a), and as task-specific scaffold-decoration models we include Delete (Chen et al., 2025), DiffDec (Xie et al., 2024), and AutoFragDiff (Ghorbani et al., 2024).

#### 3.1 RESULTS

We present the main quantitative results in Tables 2, 4, and 3. Across both synthetic and molecular settings, ACE achieves substantial improvements over NR and FKC, reflecting the benefits of enforcing the path-existence criterion and correcting heterogeneous ratio-of-density paths. We clarify that ACE differs from NR and FKC only by its adaptive exponent correction (with  $B=30$  for all experiments); all other components and hyperparameters are shared across methods.

Table 2: Distributional similarity metrics (lower is better). For each metric, we report the minimum and mean  $\pm$  standard deviation across 5 seeds. Best values are in **bold**. NR denotes no resampling, the common heuristic using only mixed scores. FKC refers to Feynman–Kac correctors, which fail when path-existence conditions are not satisfied. Path existence (O/X) is shown under Path Validity.

| Method            | Path Validity | $W_1$ |                         | $W_2$ |                        | MMD (RBF) |                           | Exponent Schedule         |
|-------------------|---------------|-------|-------------------------|-------|------------------------|-----------|---------------------------|---------------------------|
|                   |               | Min   | Mean $\pm$ Std          | Min   | Mean $\pm$ Std         | Min       | Mean $\pm$ Std            |                           |
| NR                | X             | 0.77  | 0.78 $\pm$ 0.02         | 1.06  | 1.07 $\pm$ 0.02        | 0.066     | 0.068 $\pm$ 0.001         | Constant                  |
| FKC               | X             | 2.09  | 2.13 $\pm$ 0.04         | 2.39  | 2.44 $\pm$ 0.05        | 1.07      | 1.43 $\pm$ 0.31           |                           |
| ACE ( $B = 10$ )  | X             | 1.47  | 2.02 $\pm$ 0.65         | 1.77  | 2.32 $\pm$ 0.67        | 0.44      | 0.78 $\pm$ 0.23           | Bump Function $Bt(1 - t)$ |
| ACE ( $B = 20$ )  | O             | 0.13  | 0.52 $\pm$ 0.77         | 0.18  | 0.64 $\pm$ 0.90        | 0.009     | 0.12 $\pm$ 0.24           |                           |
| ACE ( $B = 30$ )  | O             | 0.24  | <b>0.28</b> $\pm$ 0.036 | 0.35  | <b>0.40</b> $\pm$ 0.51 | 0.019     | <b>0.027</b> $\pm$ 0.0064 |                           |
| ACE ( $B = 40$ )  | O             | 0.32  | 0.36 $\pm$ 0.031        | 0.44  | 0.475 $\pm$ 0.025      | 0.034     | 0.043 $\pm$ 0.0099        |                           |
| ACE ( $B = 50$ )  | O             | 0.30  | 0.40 $\pm$ 0.07         | 0.38  | 0.53 $\pm$ 0.10        | 0.034     | 0.052 $\pm$ 0.01          |                           |
| ACE ( $B = 100$ ) | O             | 0.43  | 0.52 $\pm$ 0.07         | 0.56  | 0.69 $\pm$ 0.12        | 0.070     | 0.080 $\pm$ 0.011         |                           |

Table 3: Comparison of NR, FKc, and ACE for CrossDock-Weak and CrossDock-SBDD. Higher is better for Validity and OSR; lower (more negative) is better for Vina scores. Best values are **bold**; second-best are underlined. FKc and ACE share all hyperparameters with the only difference being the addition of the bump function in the exponents of ACE. NR is FKc without resampling.

| Method            | Path Validity | CrossDock-Weak |                       |              |              |              |              | CrossDock-SBDD |              |                       |              |              |              |              |              |
|-------------------|---------------|----------------|-----------------------|--------------|--------------|--------------|--------------|----------------|--------------|-----------------------|--------------|--------------|--------------|--------------|--------------|
|                   |               | Validity (%)   | Vina Score (kcal/mol) |              |              |              |              | OSR (%)        | Validity (%) | Vina Score (kcal/mol) |              |              |              |              | OSR (%)      |
|                   |               |                | Mean                  | Median       | Top3         | Best         | Worst        |                |              | Mean                  | Median       | Top3         | Best         | Worst        |              |
| NR ( $w = 1.0$ )  | O             | 93.30          | -4.12                 | -4.33        | -4.47        | -4.60        | -3.48        | 62.20          | 100.0        | -3.61                 | -1.85        | -2.60        | -4.10        | -1.80        | 50.0         |
| NR ( $w = 1.1$ )  | X             | 88.58          | -3.34                 | -3.30        | -4.22        | -5.37        | -1.43        | 40.00          | 99.10        | -3.65                 | -4.05        | -4.33        | -4.60        | -1.50        | 40.0         |
| NR ( $w = 1.2$ )  | X             | 90.05          | -3.58                 | -4.04        | -4.53        | -5.38        | -1.62        | 48.88          | 100.00       | -4.01                 | -4.00        | -4.21        | -4.40        | -3.55        | 40.0         |
| NR ( $w = 1.3$ )  | X             | 84.77          | -2.93                 | -2.95        | -3.66        | -4.99        | -0.92        | 44.44          | 97.15        | -2.68                 | -3.69        | -3.94        | -4.15        | 0.00         | 30.0         |
| NR ( $w = 1.4$ )  | X             | 81.91          | -2.58                 | -2.24        | -3.54        | -5.10        | -0.44        | 33.33          | 96.20        | -2.36                 | -1.70        | -3.38        | -4.30        | -0.00        | 20.0         |
| FKC ( $w = 1.0$ ) | O             | 93.30          | -4.12                 | -4.33        | -4.47        | -4.60        | -3.48        | 62.20          | 100.0        | -2.28                 | -1.85        | -2.60        | -4.10        | -1.80        | 50.0         |
| FKC ( $w = 1.1$ ) | X             | 94.30          | -4.50                 | -4.57        | -4.70        | -4.84        | -3.93        | 64.40          | 98.10        | -3.40                 | -4.15        | -4.28        | -4.40        | -2.05        | 30.0         |
| FKC ( $w = 1.2$ ) | X             | 86.70          | -3.46                 | -3.42        | -3.81        | -4.50        | -2.51        | 57.80          | 98.10        | -3.04                 | -3.70        | -3.85        | -4.05        | 0.00         | 40.0         |
| FKC ( $w = 1.3$ ) | X             | 83.80          | -2.67                 | -2.83        | -2.93        | -3.04        | -1.80        | 40.00          | 95.20        | -2.39                 | -2.40        | -2.45        | -2.55        | -2.25        | 50.0         |
| FKC ( $w = 1.4$ ) | X             | 78.10          | -2.20                 | -2.48        | -2.59        | -2.74        | -1.33        | 28.90          | 100.0        | -4.16                 | -4.10        | -4.25        | -4.45        | -4.00        | 50.0         |
| ACE ( $w = 1.0$ ) | O             | 93.30          | -4.12                 | -4.33        | -4.47        | -4.60        | -3.48        | 62.20          | 100.0        | -2.28                 | -1.85        | -2.60        | -4.10        | -1.80        | 50.0         |
| ACE ( $w = 1.1$ ) | O             | 96.70          | -5.12                 | -4.92        | -5.33        | <b>-5.88</b> | -4.74        | 91.10          | 100.0        | <u>-4.88</u>          | <u>-4.90</u> | <u>-4.93</u> | <u>-5.00</u> | <u>-4.70</u> | <b>100.0</b> |
| ACE ( $w = 1.2$ ) | O             | <b>98.60</b>   | <u>-5.44</u>          | <u>-5.67</u> | <u>-5.75</u> | <u>-5.84</u> | <u>-4.59</u> | <b>94.40</b>   | <b>100.0</b> | <b>-5.04</b>          | <b>-5.05</b> | <b>-5.08</b> | <b>-5.15</b> | <b>-4.95</b> | <u>100.0</u> |
| ACE ( $w = 1.3$ ) | O             | <b>100.0</b>   | <b>-5.72</b>          | <b>-5.71</b> | <b>-5.78</b> | <b>-5.86</b> | <b>-5.56</b> | <b>93.30</b>   | <b>100.0</b> | -4.68                 | -4.75        | -4.78        | -4.85        | -4.35        | 90.0         |
| ACE ( $w = 1.4$ ) | O             | 97.10          | -5.37                 | -5.43        | -5.48        | -5.56        | -5.05        | 80.00          | 96.20        | -2.90                 | -2.50        | -3.20        | -4.60        | -2.45        | 60.0         |

Table 4: Comparison on CrossDock-Weak and CrossDock-SBDD. Higher is better for Validity and OSR; lower (more negative) is better for Vina scores. Best values are **bold**; second-best are underlined. O indicates the method requires a reference scaffold pose; X indicates it does not.

| Method            | Req. Ref. Pose | CrossDock-Weak |                       |              |              |              |              | CrossDock-SBDD |              |                       |              |              |              |              |              |
|-------------------|----------------|----------------|-----------------------|--------------|--------------|--------------|--------------|----------------|--------------|-----------------------|--------------|--------------|--------------|--------------|--------------|
|                   |                | Validity (%)   | Vina Score (kcal/mol) |              |              |              |              | OSR (%)        | Validity (%) | Vina Score (kcal/mol) |              |              |              |              | OSR (%)      |
|                   |                |                | Mean                  | Median       | Top3         | Best         | Worst        |                |              | Mean                  | Median       | Top3         | Best         | Worst        |              |
| Delete            | O              | 69.52          | -1.83                 | -2.21        | -2.27        | -2.37        | -1.12        | 28.89          | 93.30        | <u>-4.98</u>          | <u>-4.95</u> | <b>-5.23</b> | <b>-5.65</b> | <u>-4.55</u> | <b>100.0</b> |
| DiffDec           | O              | 82.86          | -2.77                 | -2.60        | -3.03        | -3.36        | -2.28        | 35.56          | 95.20        | -1.76                 | -2.55        | -2.93        | -3.35        | 0.00         | 30.0         |
| AutoFragDiff      | O              | 98.10          | -4.82                 | -5.02        | -5.43        | -5.83        | -3.38        | 73.33          | <b>100.0</b> | -4.61                 | -4.60        | -4.95        | <u>-5.40</u> | -3.95        | 60.0         |
| ACE ( $w = 1.2$ ) | X              | <b>98.60</b>   | <u>-5.44</u>          | <u>-5.67</u> | <u>-5.75</u> | <u>-5.84</u> | <u>-4.59</u> | <b>94.40</b>   | <b>100.0</b> | <b>-5.04</b>          | <b>-5.05</b> | <b>-5.08</b> | <b>-5.15</b> | <b>-4.95</b> | <u>100.0</u> |
| ACE ( $w = 1.3$ ) | X              | <b>100.0</b>   | <b>-5.72</b>          | <b>-5.71</b> | <b>-5.78</b> | <b>-5.86</b> | <b>-5.56</b> | <b>93.30</b>   | 100.0        | -4.68                 | -4.75        | -4.78        | -4.85        | -4.35        | 90.0         |

## 4 DISCUSSION

**ACE Prevents Collapse at High Guidance Scales.** High guidance scales ( $\omega > 1$ ) are crucial for generating high-quality molecules but are also where the risk of path collapse is highest. Our results make this trade-off explicit. As shown in Tables 3 and 4, ACE maintains near-perfect validity (96.7–100%) and improves docking scores from  $-5.12$  ( $\omega=1.1$ ) to  $-5.72$  ( $\omega=1.3$ ) as  $\omega$  increases. In contrast, the FKc baseline, which uses a constant exponent, suffers catastrophic path collapse: its validity plummets to 78.1% and its docking score to  $-2.20$  at  $\omega=1.4$ ; qualitatively, in Fig. 5, the generated molecules are fragmented and chemically invalid. On CROSSDOCK-SBDD, ACE attains its best mean at  $\omega=1.2$  ( $-5.04$ ) with 100% validity and 100% OSR, whereas FKc exhibits weaker means and lower OSR (30–50%).

**Prevalence of Marginal Path Collapse.** In Appendix E.2, we evaluated all  $5^3 = 125$  three-expert annealed compositions  $h_t = q_t^{(1)}(q_t^{(2)}/q_t^{(3)})^w$  formed from five standard noise schedules (DDPM (Ho et al., 2020), cosine (Nichol & Dhariwal, 2021), sigmoid (Xu et al., 2022), linear (Lipman et al., 2023), and polynomial (Hooeboom et al., 2022a)). Excluding trivial homogeneous cases, across 100 heterogeneous schedule compositions the collapse rate increases sharply with guidance scale: 41% ( $w=1.0$ ), 66% ( $w=2.0$ ), 77% ( $w=7.5$ ), and 80% ( $w=15$ ). See Table E.5 and Figure E.5. Thus, collapse is a systematic and prevalent failure mode whenever experts differ in schedules.

**Impact of Path Collapse Duration.** Our empirical analysis suggests that the *presence* of Marginal Path Collapse is a more critical determinant of failure than its total duration: even short collapse intervals are sufficient to induce significant performance degradation. Figures E.6–E.11 show evaluation results and visualizations for schedule combinations exhibiting a wide range of collapse durations (from 7.5%, 9.0%, 10.9%, 11.4%, up to 48.8% of the full trajectory). While the precise error level varies due to secondary factors (e.g., magnitude of the criterion violation), the failure trend is consistent: NR suffers from inherent approximation errors regardless of path existence, whereas FKc performance degrades specifically because criterion violations destabilize the importance weights. In contrast, ACE reliably restores valid paths and consistently recovers the target distribution across all tested durations.

**Selection of the Bump Parameter  $B$ .** Since the path-existence criterion  $C(t)$  depends solely on the analytical schedules, candidate values of  $B$  can be pre-screened efficiently without expensive model evaluation. Empirically, we find that  $B = 30$  consistently yields strong performance across

Reviewer  
TtEF,  
naNy,  
gBQY

Reviewer  
naNy

Reviewer  
jeuE

all schedule combinations in the synthetic experiments (Fig. E.6) and in the scaffold-decoration task (Tables 4–3). The method also exhibits high stability: increasing  $B$  further (e.g.,  $B = 100$ ) maintains performance far superior to NR and FKC, with only marginal degradation relative to the optimum (see Figure. 6). This reflects a trade-off: while increasing  $B$  guarantees removal of path collapse, it also acts as a scalar multiplier on the guiding vector field, linearly amplifying inherent network approximation errors. Since larger  $B$  incurs no additional computational cost, we recommend initializing with  $B = 30$ , which is generally sufficient to satisfy the criterion, and increasing it only if performance issues persist.

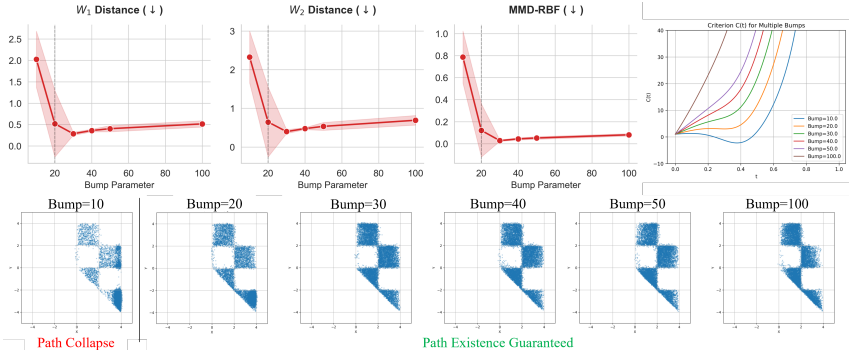

Figure 6: **Sensitivity to the bump parameter  $B$ .** Performance peaks near  $B = 30$ , but remains robust even at high values ( $B = 100$ ), whereas criterion violations at  $B = 10$  cause significant degradation. Shaded regions denote variance across 5 seeds.

**Steering Experts Outperforms Specialized Models.** Our scaffold-decoration experiments highlight the key advantage of our compositional framework: rather than training a monolithic, task-specific model, ACE achieves superior performance by flexibly combining existing DN/CONF/SBDD experts. Unlike specialized baselines that require a reference scaffold pose (Delete, DiffDec, AutoFragDiff), ACE requires no such input and still achieves stronger docking and robustness. On CROSSDOCK-WEAK, ACE attains a mean docking score of  $-5.72$  ( $\omega=1.3$ ), outperforming AutoFragDiff ( $-4.82$ ) with higher validity (100% vs. 98.1%) and OSR (93.3% vs. 73.3%). On CROSSDOCK-SBDD, ACE reaches a mean of  $-5.04$  ( $\omega=1.2$ ) and 100% OSR, surpassing Delete ( $-4.98$ , 100% OSR) and AutoFragDiff ( $-4.61$ , 60% OSR).

**Related Work.** Diffusion models can be steered at inference time using ratio-of-densities methods such as classifier-free guidance (Ho & Salimans, 2021; Chung et al., 2025), but these lack guarantees that the sampling path remains valid. Feynman–Kac correctors (FKC) (Stoltz et al., 2010; Skreta et al., 2025a; Mark et al., 2025) provide principled foundations under restrictive assumptions (e.g., homogeneous models and constant exponents), leaving real-world scenarios vulnerable to Marginal Path Collapse. Our work introduces a path-existence criterion and the Adaptive path Correction with Exponents (ACE) framework, which extend FKC to heterogeneous pretrained models and time-varying exponents, enabling robust multi-expert composition for applications in molecular drug design (Guan et al., 2023; Schneuing et al., 2024; Gao et al., 2024). We provide a comprehensive review of related work in Appendix D.

**Broader Applications.** We further demonstrate on a compositional image generation benchmark in Appendix E.4 that even in homogeneous settings, where path existence already holds, ACE can yield additional gains over NR and FKC. We discuss limitations and further directions in Appendix F.

## 5 CONCLUSION

We identified *Marginal Path Collapse* as a fundamental failure mode in ratio-of-densities diffusion steering and provided ACE, a framework that provably prevents it. Our path existence criterion serves as a diagnostic tool to predict collapse, while our ACE framework first utilizing dynamic exponent scheduling provably prevents it by ensuring a valid probability path from noise to data. Empirically, ACE eliminates collapse, reduces distributional error by more than  $5\times$  on benchmarks, and enables stable scaffold-based molecular design where existing methods fail. By transforming ratio-of-densities steering from an unstable heuristic into a theoretically grounded methodology, our work establishes both the foundations and the practical tools needed for robust inference-time control. We hope these contributions pave the way for reliable composition of heterogeneous generative models in both creative applications and high-stakes scientific domains.

540 **Use of Large Language Models.** Large language models (LLMs) were used to assist with writing,  
541 including grammar, style, and clarity improvements, and for organizational feedback on early drafts.  
542 LLMs were not used for generating original scientific content, designing experiments, or analyzing  
543 results. All technical contributions, experiments, and conclusions are the work of the authors.  
544

## 545 REFERENCES

- 546  
547 Michael S. Albergo, Nicholas M. Boffi, and Eric Vanden-Eijnden. Stochastic interpolants: A uni-  
548 fying framework for flows and diffusions, 2023. URL <https://arxiv.org/abs/2303.08797>.  
549
- 550 Amr Alhossary, Stephanus Daniel Handoko, Yuguang Mu, and Chee-Keong Kwoh. Fast, accurate,  
551 and reliable molecular docking with quickvina 2. *Bioinformatics*, 31(13):2214–2216, 02 2015.  
552 ISSN 1367-4803. doi: 10.1093/bioinformatics/btv082. URL [https://doi.org/10.1093/](https://doi.org/10.1093/bioinformatics/btv082)  
553 [bioinformatics/btv082](https://doi.org/10.1093/bioinformatics/btv082).  
554
- 555 Arpit Bansal, Hong-Min Chu, Avi Schwarzschild, Roni Sengupta, Micah Goldblum, Jonas Geiping,  
556 and Tom Goldstein. Universal guidance for diffusion models. In *The Twelfth International Confer-*  
557 *ence on Learning Representations*, 2024. URL [https://openreview.net/forum?id=](https://openreview.net/forum?id=pzpWBbnwiJ)  
558 [pzpWBbnwiJ](https://openreview.net/forum?id=pzpWBbnwiJ).
- 559 Elizabeth V Bedwell, William J McCarthy, Anthony G Coyne, and Chris Abell. Development of  
560 potent inhibitors by fragment-linking strategies. *Chemical Biology & Drug Design*, 100(4):469–  
561 486, 2022.  
562
- 563 Lital Binyamin, Yoad Tewel, Hilit Segev, Eran Hirsch, Royi Rassin, and Gal Chechik. Make it count:  
564 Text-to-image generation with an accurate number of objects. In *Proceedings of the IEEE/CVF*  
565 *Conference on Computer Vision and Pattern Recognition (CVPR)*, pp. 13242–13251, June 2025.  
566
- 567 Hila Chefer, Yuval Alaluf, Yael Vinker, Lior Wolf, and Daniel Cohen-Or. Attend-and-excite:  
568 Attention-based semantic guidance for text-to-image diffusion models. *ACM transactions on*  
569 *Graphics (TOG)*, 42(4):1–10, 2023.
- 570 Shicheng Chen, Odin Zhang, Chenran Jiang, Huifeng Zhao, Xujun Zhang, Mengting Chen, Yun  
571 Liu, Qun Su, Zhenxing Wu, Xinyue Wang, et al. Deep lead optimization enveloped in protein  
572 pocket and its application in designing potent and selective ligands targeting Itk protein. *Nature*  
573 *Machine Intelligence*, pp. 1–11, 2025.
- 574 Ting Chen. On the importance of noise scheduling for diffusion models, 2023. URL <https://arxiv.org/abs/2301.10972>.  
575  
576
- 577 Jooyoung Choi, Jungbeom Lee, Chaehun Shin, Sungwon Kim, Hyunwoo Kim, and Sungroh Yoon.  
578 Perception prioritized training of diffusion models, 2022. URL [https://arxiv.org/abs/](https://arxiv.org/abs/2204.00227)  
579 [2204.00227](https://arxiv.org/abs/2204.00227).
- 580 JunYong Choi, Min-Cheol Sagong, SeokYeong Lee, Seung-Won Jung, Ig-Jae Kim, and Junghyun  
581 Cho. Channel-wise noise scheduled diffusion for inverse rendering in indoor scenes, 2025. URL  
582 <https://arxiv.org/abs/2503.09993>.  
583
- 584 Hyungjin Chung, Jeongsol Kim, Geon Yeong Park, Hyelin Nam, and Jong Chul Ye. CFG++:  
585 Manifold-constrained classifier free guidance for diffusion models. In *The Thirteenth Interna-*  
586 *tional Conference on Learning Representations*, 2025. URL [https://openreview.net/](https://openreview.net/forum?id=E77uvbOTtp)  
587 [forum?id=E77uvbOTtp](https://openreview.net/forum?id=E77uvbOTtp).
- 588 dewei Zhou, Ji Xie, Zongxin Yang, and Yi Yang. 3DIS: Depth-driven decoupled image synthesis  
589 for universal multi-instance generation. In *The Thirteenth International Conference on Learning*  
590 *Representations*, 2025. URL <https://openreview.net/forum?id=MagmwodCAB>.  
591
- 592 Carles Domingo-Enrich, Michal Drozdal, Brian Karrer, and Ricky TQ Chen. Adjoint matching:  
593 Fine-tuning flow and diffusion generative models with memoryless stochastic optimal control.  
*arXiv preprint arXiv:2409.08861*, 2024.

- 594 Ian Dunn and David Ryan Koes. Flowmol3: Flow matching for 3d de novo small-molecule  
595 generation. *ArXiv*, 2025. URL [https://api.semanticscholar.org/CorpusID:  
596 280677042](https://api.semanticscholar.org/CorpusID:280677042).
- 597 Dave Epstein, Allan Jabri, Ben Poole, Alexei A Efros, and Aleksander Holynski. Diffusion self-  
598 guidance for controllable image generation. In *Thirty-seventh Conference on Neural Information  
599 Processing Systems*, 2023. URL <https://openreview.net/forum?id=qgv56R2YJ7>.
- 600 Patrick Esser, Sumith Kulal, Andreas Blattmann, Rahim Entezari, Jonas Müller, Harry Saini, Yam  
601 Levi, Dominik Lorenz, Axel Sauer, Frederic Boesel, et al. Scaling rectified flow transformers  
602 for high-resolution image synthesis. In *Forty-first international conference on machine learning*,  
603 2024.
- 604 Zhiguang Fan, Yuedong Yang, Mingyuan Xu, and Hongming Chen. Ec-conf: An ultra-fast diffusion  
605 model for molecular conformation generation with equivariant consistency, 2023. URL [https:  
606 //arxiv.org/abs/2308.00237](https://arxiv.org/abs/2308.00237).
- 607 Paul G. Francoeur, Travis Masuda, Jocelyn Sunseri, Andrew Jia, Rocco B. Iovanisci, Ian Snyder, and  
608 David R. Koes. Three-dimensional convolutional neural networks and a crossdocked data set for  
609 structure-based drug design. *Journal of Chemical Information and Modeling*, 60(9):4200–4215,  
610 2020. doi: 10.1021/acs.jcim.0c00411.
- 611 Bowen Gao, Minsi Ren, Yuyan Ni, Yanwen Huang, Bo Qiang, Zhi-Ming Ma, Wei-Ying Ma, and  
612 Yanyan Lan. Rethinking specificity in SBDD: Leveraging delta score and energy-guided dif-  
613 fusion. In Ruslan Salakhutdinov, Zico Kolter, Katherine Heller, Adrian Weller, Nuria Oliver,  
614 Jonathan Scarlett, and Felix Berkenkamp (eds.), *Proceedings of the 41st International Con-  
615 ference on Machine Learning*, volume 235 of *Proceedings of Machine Learning Research*,  
616 pp. 14811–14825. PMLR, 21–27 Jul 2024. URL [https://proceedings.mlr.press/  
617 v235/gao24k.html](https://proceedings.mlr.press/v235/gao24k.html).
- 618 Milad Ghorbani, Yutong Lian, Matthew Fialkowski, Shravan Veeraraghavan, and Michael J. Keiser.  
619 Autoregressive fragment-based diffusion for pocket-aware molecule generation. arXiv preprint  
620 arXiv:2401.05370, 2024. URL <https://arxiv.org/abs/2401.05370>.
- 621 Guoping Guan, Lun Bai, Baoqi Zuo, Mingzhong Li, Zhengyu Wu, and Yonglin Li. Scaffolds deco-  
622 rated by in vivo environment improve cell proliferation and wound healing. In *2009 2nd Interna-  
623 tional Conference on Biomedical Engineering and Informatics*, pp. 1–6. IEEE, 2009.
- 624 Jiequn Guan et al. 3d equivariant diffusion for target-aware molecule generation and affinity  
625 prediction. In *International Conference on Learning Representations*, 2023. URL [https:  
626 //arxiv.org/abs/2303.03543](https://arxiv.org/abs/2303.03543).
- 627 Mohsin Hasan, Marta Skreta, Alan Aspuru-Guzik, Yoshua Bengio, and Kirill Neklyudov. Discrete  
628 feynman-kac correctors. In *2nd AI for Math Workshop @ ICML 2025*, 2025. URL [https:  
629 //openreview.net/forum?id=Cafv07fIdq](https://openreview.net/forum?id=Cafv07fIdq).
- 630 Majdi Hassan, Nikhil Shenoy, Jungyoon Lee, Hannes Stärk, Stephan Thaler, and Do-  
631 minique Beaini. Et-flow: Equivariant flow-matching for molecular conformer gener-  
632 ation. In A. Globerson, L. Mackey, D. Belgrave, A. Fan, U. Paquet, J. Tom-  
633 czak, and C. Zhang (eds.), *Advances in Neural Information Processing Systems*, vol-  
634 ume 37, pp. 128798–128824. Curran Associates, Inc., 2024. doi: 10.52202/  
635 079017-4091. URL [https://proceedings.neurips.cc/paper\\_files/paper/  
636 2024/file/e8bd617e7dd0394ceadf37b4a7773179-Paper-Conference.pdf](https://proceedings.neurips.cc/paper_files/paper/2024/file/e8bd617e7dd0394ceadf37b4a7773179-Paper-Conference.pdf).
- 637 Jonathan Ho and Tim Salimans. Classifier-free diffusion guidance. In *NeurIPS 2021 Workshop on  
638 Deep Generative Models and Downstream Applications*, 2021. URL [https://openreview.  
639 net/forum?id=qw8AKxfYbI](https://openreview.net/forum?id=qw8AKxfYbI).
- 640 Jonathan Ho, Ajay Jain, and Pieter Abbeel. Denoising diffusion probabilistic models. *Advances in  
641 neural information processing systems*, 33:6840–6851, 2020.
- 642 Emiel Hoogetboom, Victor Garcia Satorras, Clément Vignac, and Max Welling. Equivariant diffu-  
643 sion for molecule generation in 3d. In *International conference on machine learning*, pp. 8867–  
644 8887. PMLR, 2022a.

- 648 Emiel Hoogeboom, Victor Garcia Satorras, Clément Vignac, and Max Welling. Equivariant diffu-  
649 sion for molecule generation in 3d. In *International conference on machine learning*, pp. 8867–  
650 8887. PMLR, 2022b.
- 651 Chao Hu, Song Li, Chenxing Yang, Jun Chen, Yi Xiong, Guisheng Fan, Hao Liu, and Liang Hong.  
652 Scaffoldgva: scaffold generation and hopping of drug molecules via a variational autoencoder  
653 based on multi-view graph neural networks. *Journal of Cheminformatics*, 15(1):91, 2023.
- 654 Jie Huang and Daiheng Zhang. MolFORM: Multi-modal flow matching for structure-based drug  
655 design. In *ICML 2025 Generative AI and Biology (GenBio) Workshop, 2025*. URL <https://openreview.net/forum?id=ky1XbRzdD6>.
- 656 Lei Huang, Tingyang Xu, Yang Yu, Peilin Zhao, Xingjian Chen, Jing Han, Zhi Xie, Hailong  
657 Li, Wenge Zhong, Ka-Chun Wong, and Hengtong Zhang. A dual diffusion model enables 3d  
658 molecule generation and lead optimization based on target pockets. *Nature Communications*, 15  
659 (1):2698, 2024a. doi: 10.1038/s41467-024-46569-1. URL [https://www.nature.com/  
660 articles/s41467-024-46569-1](https://www.nature.com/articles/s41467-024-46569-1).
- 661 Zhilin Huang, Ling Yang, Zaixi Zhang, Xiangxin Zhou, Yu Bao, Xiawu Zheng, Yuwei Yang,  
662 Yu Wang, and Wenming Yang. Binding-adaptive diffusion models for structure-based drug de-  
663 sign. In *The AAAI Conference on Artificial Intelligence*, 2024b.
- 664 Zhilin Huang, Ling Yang, Zaixi Zhang, Xiangxin Zhou, Yu Bao, Xiawu Zheng, Yuwei Yang,  
665 Yu Wang, and Wenming Yang. Binding-adaptive diffusion models for structure-based drug de-  
666 sign. In *The AAAI Conference on Artificial Intelligence*, 2024c.
- 667 Zhilin Huang, Ling Yang, Xiangxin Zhou, Chujun Qin, Yijie Yu, Xiawu Zheng, Zikun Zhou, Wentao  
668 Zhang, Yu Wang, and Wenming Yang. Interaction-based retrieval-augmented diffusion models  
669 for protein-specific 3d molecule generation. In *Forty-first International Conference on Machine  
670 Learning*, 2024d. URL <https://openreview.net/forum?id=eejhD9FCP3>.
- 671 Michael F Hutchinson. A stochastic estimator of the trace of the influence matrix for laplacian  
672 smoothing splines. *Communications in Statistics-Simulation and Computation*, 18(3):1059–1076,  
673 1989.
- 674 Iliia Igashov, Hannes Stärk, Clément Vignac, Arne Schneuing, Victor Garcia Satorras, Pascal  
675 Frossard, Max Welling, Michael Bronstein, and Bruno Correia. Equivariant 3d-conditional diffu-  
676 sion model for molecular linker design. *Nature Machine Intelligence*, pp. 1–11, 2024.
- 677 Bowen Jing, Gabriele Corso, Jeffrey Chang, Regina Barzilay, and Tommi Jaakkola. Torsional diffu-  
678 sion for molecular conformer generation. *arXiv preprint arXiv:2206.01729*, 2022.
- 679 Maho Kawasaki, Hiroshi Ogiwara, Takuya Kawamoto, Saori Nakada, Tomoya Machida, To-  
680 mohiro Itoh, Ryotaro Kimura, Seitaka Harada, Shion Iwasaki, Akihiro Takahashi, Kohei  
681 Yoshida, Kyosuke Yamashita, Yuichi Yoshimura, Takanori Kigawa, Yasufumi Tsujimoto, Hi-  
682 roshi Nishina, Masaki Naito, and Tasuku Kinoshita. Structure-based discovery of molecu-  
683 lar glues for protein–protein interactions. *Nature Chemical Biology*, 19:407–416, 2023. doi:  
684 10.1038/s41589-023-01377-4.
- 685 Mohamed Amine Ketata, Nicholas Gao, Johanna Sommer, Tom Wollschläger, and Stephan  
686 Günnemann. Lift your molecules: Molecular graph generation in latent euclidean space. In  
687 *ICML 2024 Workshop on Geometry-grounded Representation Learning and Generative Model-  
688 ing*, 2024. URL <https://openreview.net/forum?id=gjjuVDX7YJ>.
- 689 Black Forest Labs. Flux. <https://github.com/black-forest-labs/flux>, 2024.
- 690 Seunghan Lee, Kibok Lee, and Taeyoung Park. Ant: Adaptive noise schedule for time series diffu-  
691 sion models, 2024. URL <https://arxiv.org/abs/2410.14488>.
- 692 Xiang Lisa Li, Ari Holtzman, Daniel Fried, Percy Liang, Jason Eisner, Tatsunori Hashimoto, Luke  
693 Zettlemoyer, and Mike Lewis. Contrastive decoding: Open-ended text generation as optimization.  
694 In Anna Rogers, Jordan Boyd-Graber, and Naoaki Okazaki (eds.), *Proceedings of the 61st Annual  
695 Meeting of the Association for Computational Linguistics (Volume 1: Long Papers)*, pp. 12286–  
696 12312, Toronto, Canada, July 2023a. Association for Computational Linguistics. doi: 10.18653/  
697 v1/2023.acl-long.687. URL <https://aclanthology.org/2023.acl-long.687/>.

- 702 Yuheng Li, Haotian Liu, Qingyang Wu, Fangzhou Mu, Jianwei Yang, Jianfeng Gao, Chunyuan Li,  
703 and Yong Jae Lee. Gligen: Open-set grounded text-to-image generation. In *Proceedings of the*  
704 *IEEE/CVF conference on computer vision and pattern recognition*, pp. 22511–22521, 2023b.
- 705  
706 Haitao Lin, Yufei Huang, Odin Zhang, Yunfan Liu, Lirong Wu, Siyuan Li, Zhiyuan Chen, and  
707 Stan Z. Li. Functional-group-based diffusion for pocket-specific molecule generation and elabo-  
708 ration. In A. Oh, T. Naumann, A. Globerson, K. Saenko, M. Hardt, and S. Levine (eds.), *Advances*  
709 *in Neural Information Processing Systems*, volume 36, pp. 34603–34626. Curran Associates, Inc.,  
710 2023. URL [https://proceedings.neurips.cc/paper\\_files/paper/2023/](https://proceedings.neurips.cc/paper_files/paper/2023/file/6cdd4ce9330025967dd1ed0bed3010f5-Paper-Conference.pdf)  
711 [file/6cdd4ce9330025967dd1ed0bed3010f5-Paper-Conference.pdf](https://proceedings.neurips.cc/paper_files/paper/2023/file/6cdd4ce9330025967dd1ed0bed3010f5-Paper-Conference.pdf).
- 712 Yaron Lipman, Ricky T. Q. Chen, Heli Ben-Hamu, Maximilian Nickel, and Matthew Le. Flow  
713 matching for generative modeling. In *The Eleventh International Conference on Learning Repre-*  
714 *sentations*, 2023. URL <https://openreview.net/forum?id=PqvMRDCJT9t>.
- 715  
716 Xuefeng Liu, Songhao Jiang, and Rick Stevens. Scaffoldgpt: A scaffold-based large language model  
717 for drug improvement. *arXiv e-prints*, pp. arXiv-2502, 2025.
- 718 Konstantin Mark, Leonard Galustian, Maximilian P-P Kovar, and Esther Heid. Feynman-kac-flow:  
719 Inference steering of conditional flow matching to an energy-tilted posterior. *arXiv preprint*  
720 *arXiv:2509.01543*, 2025.
- 721  
722 Rina Mogaki, Kou Okuro, Ryosuke Ueki, Shinsuke Sando, and Takuzo Aida. Molecular glue that  
723 spatiotemporally turns on protein–protein interactions. *Journal of the American Chemical Society*,  
724 141(20):8035–8040, 2019.
- 725  
726 Alex Morehead and Jianlin Cheng. Geometry-complete diffusion for 3d molecule generation.  
727 In *ICLR 2023 - Machine Learning for Drug Discovery workshop*, 2023. URL [https://](https://openreview.net/forum?id=X-tLu3OUE-d)  
[openreview.net/forum?id=X-tLu3OUE-d](https://openreview.net/forum?id=X-tLu3OUE-d).
- 728  
729 Christian A Naesseth, Fredrik Lindsten, Thomas B Schön, et al. Elements of sequential monte carlo.  
730 *Foundations and Trends® in Machine Learning*, 12(3):307–392, 2019.
- 731  
732 Alexander Quinn Nichol and Prafulla Dhariwal. Improved denoising diffusion probabilistic models.  
733 In *International conference on machine learning*, pp. 8162–8171. PMLR, 2021.
- 734  
735 Philipp Nikitin, Dylan M Anstine, Saeed Gopal Paliwal, and Olexandr Isayev. Scalable low-energy  
736 molecular conformer generation with quantum mechanical accuracy. In *AI for Accelerated Mate-*  
737 *rials Design-NeurIPS 2025*, 2025.
- 738  
739 Marie Oestreich, Erinc Merdivan, Michael Lee, Joachim L. Schultze, Marie Piraud, and Matthias  
740 Becker. Drugdiff - small molecule diffusion model with flexible guidance towards molecular  
741 properties. *bioRxiv*, 2024. doi: 10.1101/2024.07.17.603873. URL [https://www.biorxiv.](https://www.biorxiv.org/content/early/2024/07/21/2024.07.17.603873)  
[org/content/early/2024/07/21/2024.07.17.603873](https://www.biorxiv.org/content/early/2024/07/21/2024.07.17.603873).
- 742  
743 Elizabeth Pavlova and Xue-Xin Wei. Diffusion models under low-noise regime, 2025. URL  
744 <https://arxiv.org/abs/2506.07841>.
- 745  
746 Xingang Peng, Shitong Luo, Jiequn Guan, Qi Xie, and Jian Ma. Pocket2mol: Efficient molec-  
747 ular sampling based on 3d protein pockets. In *Proceedings of the 39th International Con-*  
748 *ference on Machine Learning (ICML)*, volume 162, pp. 17644–17655. PMLR, 2022. URL  
749 <https://proceedings.mlr.press/v162/peng22b.html>.
- 750  
751 Dustin Podell, Zion English, Kyle Lacey, Andreas Blattmann, Tim Dockhorn, Jonas Müller, Joe  
752 Penna, and Robin Rombach. Sdxl: Improving latent diffusion models for high-resolution image  
753 synthesis. *arXiv preprint arXiv:2307.01952*, 2023.
- 754  
755 Weimin Qiu, Jieke Wang, and Meng Tang. Self-cross diffusion guidance for text-to-image synthesis  
of similar subjects. In *Proceedings of the Computer Vision and Pattern Recognition Conference*,  
pp. 23528–23538, 2025.
- Robin Rombach, Andreas Blattmann, Dominik Lorenz, Patrick Esser, and Björn Ommer. High-  
resolution image synthesis with latent diffusion models, 2021.

- 756 Robin Rombach, Andreas Blattmann, Dominik Lorenz, Patrick Esser, and Björn Ommer. High-  
757 resolution image synthesis with latent diffusion models. In *Proceedings of the IEEE/CVF confer-*  
758 *ence on computer vision and pattern recognition*, pp. 10684–10695, 2022.
- 759 Sheldon M Ross, Sheldon M Ross, Sheldon M Ross, Sheldon M Ross, and Etats-Unis  
760 Mathématicien. *A first course in probability*, volume 6. Prentice Hall Upper Saddle River, NJ,  
761 1998.
- 762 Daniel Rothchild, Andrew S. Rosen, Eric Taw, Connie Robinson, Joseph Gonzalez, and Aditi S.  
763 Krishnapriyan. Investigating the behavior of diffusion models for accelerating electronic struc-  
764 ture calculations. *Chemical Science*, 15:13506 – 13522, 2023. URL [https://api.](https://api.semanticscholar.org/CorpusID:265019398)  
765 [semanticscholar.org/CorpusID:265019398](https://api.semanticscholar.org/CorpusID:265019398).
- 766 Subham Sekhar Sahoo, Aaron Gokaslan, Christopher De Sa, and Volodymyr Kuleshov. Diffu-  
767 sion models with learned adaptive noise. In *The Thirty-eighth Annual Conference on Neural*  
768 *Information Processing Systems*, 2024. URL [https://openreview.net/forum?id=](https://openreview.net/forum?id=1oMa99A4p8)  
769 [1oMa99A4p8](https://openreview.net/forum?id=1oMa99A4p8).
- 770 Yair Schiff, Subham Sekhar Sahoo, Hao Phung, Guanghan Wang, Sam Boshar, Hugo Dalla-torre,  
771 Bernardo P de Almeida, Alexander M Rush, Thomas PIERROT, and Volodymyr Kuleshov. Sim-  
772 ple guidance mechanisms for discrete diffusion models. In *The Thirteenth International Confer-*  
773 *ence on Learning Representations*, 2025. URL [https://openreview.net/forum?id=](https://openreview.net/forum?id=i5MrJ6g5G1)  
774 [i5MrJ6g5G1](https://openreview.net/forum?id=i5MrJ6g5G1).
- 775 Arne Schneuing et al. Structure-based drug design with equivariant diffusion models. *Nature Ma-*  
776 *chine Intelligence*, 2024. URL <https://arxiv.org/abs/2210.13695>.
- 777 Hyunjin Seo, Taewon Kim, Sihyun Yu, and SungSoo Ahn. Learning flexible forward trajectories for  
778 masked molecular diffusion, 2025. URL <https://arxiv.org/abs/2505.16790>.
- 779 Raghav Singhal, Zachary Horvitz, Ryan Teehan, Mengye Ren, Zhou Yu, Kathleen McKeown, and  
780 Rajesh Ranganath. A general framework for inference-time scaling and steering of diffusion  
781 models. In *Forty-second International Conference on Machine Learning*, 2025. URL [https://](https://openreview.net/forum?id=Jp988ELppQ)  
782 [openreview.net/forum?id=Jp988ELppQ](https://openreview.net/forum?id=Jp988ELppQ).
- 783 Marta Skreta, Tara Akhound-Sadegh, Viktor Ohanesian, Roberto Bondesan, Alan Aspuru-Guzik,  
784 Arnaud Doucet, Rob Brekelmans, Alexander Tong, and Kirill Neklyudov. Feynman-kac correc-  
785 tors in diffusion: Annealing, guidance, and product of experts. In *Forty-second International*  
786 *Conference on Machine Learning*, 2025a. URL [https://openreview.net/forum?id=](https://openreview.net/forum?id=Vhc0KrcqWu)  
787 [Vhc0KrcqWu](https://openreview.net/forum?id=Vhc0KrcqWu).
- 788 Marta Skreta, Lazar Atanackovic, Joey Bose, Alexander Tong, and Kirill Neklyudov. The superpo-  
789 sition of diffusion models using the itô density estimator. In *The Thirteenth International Confer-*  
790 *ence on Learning Representations*, 2025b. URL [https://openreview.net/forum?id=](https://openreview.net/forum?id=2o58Mbpqkd2)  
791 [2o58Mbpqkd2](https://openreview.net/forum?id=2o58Mbpqkd2).
- 792 Maciej Slabicki, Heekyung Yoon, Janina Koeppel, Yu Iizuka, Selina Paul, Michael Hölzel, Ingo Au-  
793 gustin, Wenqi Hu, Christopher Dillon, Sebastian Grünwald, Ming Hao, Elizabeth McGrath, Jie  
794 Jin, Rose George, Jinhua Hu, Andrew Miller, Emmanuel Lenoir, Rob Arts, Vincent A. Blomen,  
795 Sebastian Frank, Gerald E. Winter, Ugo Cavallaro, Brian M. Wolpin, Evan J. Greenspan, Ran-  
796 dall D. Wright, Maurizio Heidenreich, Matthew Orth, Qionsi Xu, Manman Gui, Jeff Perry, Eric  
797 Stevens, Katharina Papsdorf, Camilo Munoz, Shanqing Li, Aviad Tsherniak, Jesse S. Boehm,  
798 Todd R. Golub, and Benjamin L. Ebert. The cdk12/13-dependent transcriptional activation reg-  
799 ulates the G1/S transition and is triggered by molecular glue degraders. *Nature*, 588(7838):164–  
800 168, 2020. doi: 10.1038/s41586-020-2837-x.
- 801 Jiaming Song, Qinsheng Zhang, Hongxu Yin, Morteza Mardani, Ming-Yu Liu, Jan Kautz, Yongxin  
802 Chen, and Arash Vahdat. Loss-guided diffusion models for plug-and-play controllable generation.  
803 In Andreas Krause, Emma Brunskill, Kyunghyun Cho, Barbara Engelhardt, Sivan Sabato, and  
804 Jonathan Scarlett (eds.), *Proceedings of the 40th International Conference on Machine Learning*,  
805 volume 202 of *Proceedings of Machine Learning Research*, pp. 32483–32498. PMLR, 23–29 Jul  
806 2023. URL <https://proceedings.mlr.press/v202/song23k.html>.

- 810 Yang Song, Jascha Sohl-Dickstein, Diederik P Kingma, Abhishek Kumar, Stefano Ermon, and Ben  
811 Poole. Score-based generative modeling through stochastic differential equations. In *International  
812 Conference on Learning Representations*, 2021. URL [https://openreview.net/  
813 forum?id=PXTIG12RRHS](https://openreview.net/forum?id=PXTIG12RRHS).
- 814 Dmitrii Sorokin, Maksim Nakhodnov, Andrey Kuznetsov, and Aibek Alanov. Imagerefl: Balancing  
815 quality and diversity in human-aligned diffusion models, 2025. URL [https://arxiv.org/  
816 abs/2505.22569](https://arxiv.org/abs/2505.22569).
- 817 Gabriel Stoltz, Mathias Rousset, et al. *Free energy computations: A mathematical perspective*.  
818 World Scientific, 2010.
- 819 Jocelyn Sunseri and David R. Koes. Pharmacophore-constrained fragment linking. *Journal of  
820 Chemical Information and Modeling*, 60(3):1184–1193, 2020. doi: 10.1021/acs.jcim.9b00966.
- 821 Youhai Tan, Lingxue Dai, Weifeng Huang, Yinfeng Guo, Shuangjia Zheng, Jinping Lei, Hongming  
822 Chen, and Yuedong Yang. Drlinker: deep reinforcement learning for optimization in fragment  
823 linking design. *Journal of Chemical Information and Modeling*, 62(23):5907–5917, 2022.
- 824 André Brasil Vieira Wzykowski, Fatemeh Fathi Niazi, and Alex Dickson. Agdiff: Attention-  
825 enhanced diffusion for molecular geometry prediction. *Journal of Chemical Information and  
826 Modeling*, 65(4):1798–1811, 2025. doi: 10.1021/acs.jcim.4c01896. URL [https://doi.  
827 org/10.1021/acs.jcim.4c01896](https://doi.org/10.1021/acs.jcim.4c01896). PMID: 39933880.
- 828 Clement Vignac, Nagham Osman, Laura Toni, and Pascal Frossard. Midi: Mixed graph and 3d de-  
829 noising diffusion for molecule generation. In *ICLR 2023 - Machine Learning for Drug Discovery  
830 workshop*, 2023. URL <https://openreview.net/forum?id=M6Ifac3G4HK>.
- 831 Donghan Wang, Xu Dong, Xueyou Zhang, and LiHong Hu. Gadiff: a transferable graph at-  
832 tention diffusion model for generating molecular conformations. *Briefings in Bioinformat-  
833 ics*, 26(1):bbae676, 12 2024a. ISSN 1477-4054. doi: 10.1093/bib/bbae676. URL [https:  
834 //doi.org/10.1093/bib/bbae676](https://doi.org/10.1093/bib/bbae676).
- 835 Xudong Wang, Trevor Darrell, Sai Saketh Rambhatla, Rohit Girdhar, and Ishan Misra. Instancedif-  
836 fusion: Instance-level control for image generation, 2024b.
- 837 Xudong Wang, Trevor Darrell, Sai Saketh Rambhatla, Rohit Girdhar, and Ishan Misra. Instancedif-  
838 fusion: Instance-level control for image generation. In *Proceedings of the IEEE/CVF conference  
839 on computer vision and pattern recognition*, pp. 6232–6242, 2024c.
- 840 Jiacheng Xie, Ziqi Wang, Yulin Wen, Yang Lin, Tingyang Wang, Junzhou He, and Wenwu Wang.  
841 Diffdec: Structure-aware scaffold decoration with an end-to-end diffusion model. *Journal of  
842 Chemical Information and Modeling*, 2024. doi: 10.1021/acs.jcim.3c01466. Early Access.
- 843 Guikun Xu, Yankai Yu, Yongquan Jiang, Yan Yang, and Yatao Bian. CoFM: Molecular conform-  
844 ation generation via flow matching in SE(3)-invariant latent space. In *ICML 2025 Generative  
845 AI and Biology (GenBio) Workshop*, 2025. URL [https://openreview.net/forum?id=  
846 C0jrjy4F1D](https://openreview.net/forum?id=C0jrjy4F1D).
- 847 Minkai Xu, Lantao Yu, Yang Song, Chence Shi, Stefano Ermon, and Jian Tang. Geodiff: A  
848 geometric diffusion model for molecular conformation generation. In *International Confer-  
849 ence on Learning Representations*, 2022. URL [https://openreview.net/forum?id=  
850 PzcvxEMzvQC](https://openreview.net/forum?id=PzcvxEMzvQC).
- 851 Haotian Ye, Haowei Lin, Jiaqi Han, Minkai Xu, Sheng Liu, Yitao Liang, Jianzhu Ma, James Zou,  
852 and Stefano Ermon. TFG: Unified training-free guidance for diffusion models. In *The Thirty-  
853 eighth Annual Conference on Neural Information Processing Systems*, 2024. URL [https://  
854 openreview.net/forum?id=N8YbGX98vc](https://openreview.net/forum?id=N8YbGX98vc).
- 855 Jiwen Yu, Yinhuai Wang, Chen Zhao, Bernard Ghanem, and Jian Zhang. Freedom: Training-free  
856 energy-guided conditional diffusion model. *Proceedings of the IEEE/CVF International Confer-  
857 ence on Computer Vision (ICCV)*, 2023.

864 Peining Zhang, Jinbo Bi, and Minghu Song. Veda: 3d molecular generation via variance-exploding  
865 diffusion with annealing, 2025. URL <https://arxiv.org/abs/2511.09568>.  
866

867 Dewei Zhou, You Li, Fan Ma, Xiaoting Zhang, and Yi Yang. Migc: Multi-instance generation  
868 controller for text-to-image synthesis. In *Proceedings of the IEEE/CVF Conference on Computer  
869 Vision and Pattern Recognition*, pp. 6818–6828, 2024a.

870 Dewei Zhou, You Li, Fan Ma, Xiaoting Zhang, and Yi Yang. Migc: Multi-instance generation con-  
871 troller for text-to-image synthesis, 2024b. URL <https://arxiv.org/abs/2402.05408>.  
872

873 Jingyuan Zhou, Hao Qian, Shikui Tu, and Lei Xu. Prior-guided flow matching for target-aware  
874 molecule design with learnable atom number, 2025. URL [https://arxiv.org/abs/  
875 2509.01486](https://arxiv.org/abs/2509.01486).

876 Yael Ziv, Fergus Imrie, Brian Marsden, and Charlotte M. Deane. Molsnapper: Conditioning dif-  
877 fusion for structure-based drug design. *Journal of Chemical Information and Modeling*, 65(9):  
878 4263–4273, 2025. doi: 10.1021/acs.jcim.4c02008. URL [https://doi.org/10.1021/  
880 acs.jcim.4c02008](https://doi.org/10.1021/<br/>879 acs.jcim.4c02008). PMID: 40248896.  
881  
882  
883  
884  
885  
886  
887  
888  
889  
890  
891  
892  
893  
894  
895  
896  
897  
898  
899  
900  
901  
902  
903  
904  
905  
906  
907  
908  
909  
910  
911  
912  
913  
914  
915  
916  
917

# Appendix

The source code is available at [To\\_Be\\_Updated](#).

|     |                                                                                                   |           |
|-----|---------------------------------------------------------------------------------------------------|-----------|
| 918 |                                                                                                   |           |
| 919 |                                                                                                   |           |
| 920 | The source code is available at <a href="#">To_Be_Updated</a> .                                   |           |
| 921 |                                                                                                   |           |
| 922 | <b>A Theoretical Foundations of ACE for Heterogeneous Ratio-of-Densities</b>                      | <b>19</b> |
| 923 |                                                                                                   |           |
| 924 | A.1 Main Theorems and Proofs . . . . .                                                            | 19        |
| 925 | A.2 <a href="#">Algorithmic Formulations and Comparison: FKC vs. ACE</a> . . . . .                | 23        |
| 926 |                                                                                                   |           |
| 927 | <b>B Integrability Preservation Along Stochastic Paths</b>                                        | <b>25</b> |
| 928 |                                                                                                   |           |
| 929 | B.1 Mathematical Preliminaries . . . . .                                                          | 25        |
| 930 | B.2 Compactly Supported Distributions . . . . .                                                   | 26        |
| 931 | B.3 Adaptive Exponents and Bump Function Corrections . . . . .                                    | 28        |
| 932 | B.4 Gaussian Mixture Models . . . . .                                                             | 30        |
| 933 |                                                                                                   |           |
| 934 |                                                                                                   |           |
| 935 | <b>C Experimental Setup</b>                                                                       | <b>32</b> |
| 936 |                                                                                                   |           |
| 937 | C.1 Synthetic Dataset: 2D Checker . . . . .                                                       | 32        |
| 938 | C.2 Flexible-Pose Scaffold Decoration . . . . .                                                   | 33        |
| 939 |                                                                                                   |           |
| 940 | <b>D Background and Related Work</b>                                                              | <b>34</b> |
| 941 |                                                                                                   |           |
| 942 | D.1 <a href="#">Common Steering Objectives as Ratio-of-Densities Paths</a> . . . . .              | 35        |
| 943 |                                                                                                   |           |
| 944 | <b>E Additional Analyses: Heterogeneous Composition and Path Collapse</b>                         | <b>36</b> |
| 945 |                                                                                                   |           |
| 946 | E.1 <a href="#">Heterogeneous Conditioning Structures in Scientific Tasks</a> . . . . .           | 36        |
| 947 | E.2 <a href="#">Prevalence and Consequences of Marginal Path Collapse</a> . . . . .               | 42        |
| 948 | E.3 <a href="#">Necessity of Task-Specific Noise Schedulers</a> . . . . .                         | 50        |
| 949 | E.4 <a href="#">ACE Beyond Collapse: Compositional Image Generation in the Homogeneous Regime</a> | 51        |
| 950 |                                                                                                   |           |
| 951 |                                                                                                   |           |
| 952 | <b>F Future Directions for ACE</b>                                                                | <b>56</b> |
| 953 |                                                                                                   |           |
| 954 |                                                                                                   |           |
| 955 |                                                                                                   |           |
| 956 |                                                                                                   |           |
| 957 |                                                                                                   |           |
| 958 |                                                                                                   |           |
| 959 |                                                                                                   |           |
| 960 |                                                                                                   |           |
| 961 |                                                                                                   |           |
| 962 |                                                                                                   |           |
| 963 |                                                                                                   |           |
| 964 |                                                                                                   |           |
| 965 |                                                                                                   |           |
| 966 |                                                                                                   |           |
| 967 |                                                                                                   |           |
| 968 |                                                                                                   |           |
| 969 |                                                                                                   |           |
| 970 |                                                                                                   |           |
| 971 |                                                                                                   |           |

## A THEORETICAL FOUNDATIONS OF ACE FOR HETEROGENEOUS RATIO-OF-DENSITIES

### A.1 MAIN THEOREMS AND PROOFS

**Definition A.1** (Ratio-of-Density Probability Path). Fix  $t \in [0, 1]$  and let  $\mu$  be a  $\sigma$ -finite reference measure on  $\mathbb{R}^d$ . For  $i = 1, \dots, n$ , let  $q_t^{(i)} : \mathbb{R}^d \rightarrow [0, \infty)$  be measurable densities and  $\tilde{q}_t^{(i)} = q_t^{(i)} \circ \pi_i$  be their canonical lifts to  $\mathbb{R}^d$ . We define the **ratio-of-densities path** as the family of functions  $\{p_t^*\}_{t \in [0, 1]}$  given by:

$$p_t^*(x) := \frac{h_t(x)}{Z_t}, \quad \text{where} \quad h_t(x) = \prod_{i=1}^n \left( \tilde{q}_t^{(i)}(x) \right)^{\gamma_i}, \quad (\text{A.1})$$

provided the following existence conditions are satisfied:

- **Support Inclusion:** Let  $I_+ = \{i : \gamma_i > 0\}$  and  $I_- = \{i : \gamma_i < 0\}$ . Then  $\text{supp}(\prod_{i \in I_+} \tilde{q}_t^{(i)}) \subseteq \text{supp}(\prod_{i \in I_-} \tilde{q}_t^{(i)}) =: \Omega_t$ , preventing singularities on the boundary  $\partial\Omega_t$ .
- **Integrability:** The unnormalized product  $h_t$  belongs to  $L^1(\mu)$  with  $0 < Z_t < \infty$ .

*Remark.* Measurability of  $h_t$  is guaranteed as the product of compositions of measurable functions with continuous projections. The integrability condition ensures  $p_t^*$  is a valid Radon-Nikodym derivative  $d\mathbb{P}_t^*/d\mu$ .

**Proposition A.1** (Expectation identity under Feynman–Kac dynamics). Let  $(p_t)_{t \in [0, T]}$  be a family of probability densities on  $\mathbb{R}^d$  evolving according to the weighted Feynman–Kac PDE

$$\frac{\partial}{\partial t} p_t(x) = -\nabla \cdot (p_t(x) v_t(x)) + \frac{\sigma_t^2}{2} \Delta p_t(x) + p_t(x) \left( g_t(x) - \int g_t(y) p_t(y) dy \right), \quad (\text{A.2})$$

where  $v_t : \mathbb{R}^d \rightarrow \mathbb{R}^d$  is a drift field,  $\sigma_t > 0$  a scalar diffusion coefficient, and  $g_t : \mathbb{R}^d \rightarrow \mathbb{R}$  a measurable weight function.

Consider the diffusion process

$$dx_t = v_t(x_t) dt + \sigma_t dW_t, \quad x_0 \sim p_0,$$

driven by a standard Brownian motion  $(W_t)_{t \geq 0}$ . Define the weight process

$$w_T = \exp \left( \int_0^T g_s(x_s) ds \right).$$

Then for any bounded test function  $\phi : \mathbb{R}^d \rightarrow \mathbb{R}$ ,

$$\mathbb{E}_{p_T}[\phi(x_T)] = \frac{1}{Z_T} \mathbb{E}[w_T \phi(x_T)], \quad (\text{A.3})$$

where the expectation on the right is with respect to the law of the process  $(x_t)_{t \in [0, T]}$ , and  $Z_T > 0$  is a normalizing constant for  $w_T$  independent of  $x_T$ .

*Proof.* The proof can be found in **Proposition A.1.** of Skreta et al. (2025a) or Section 4 of Stoltz et al. (2010).  $\square$

**Theorem A.1** (Adaptive path Correction with time-dependent Exponents (ACE)). *For each  $i \in \{1, \dots, n\}$ , let*

$$\gamma_i(t) : \mathbb{R} \rightarrow \mathbb{R}$$

*be differentiable with respect to  $t$  and  $\{q_t^{(i)}\}_{t \in [0,1]}$  denote probability densities in  $\mathbb{R}^{d_i}$  with respect to the Lebesgue measure. Suppose each probability path  $\{q_t^{(i)}\}_{t \in [0,1]}$  is associated with the stochastic differential equation (SDE):*

$$X_0^{(i)} \sim q_0^{(i)}, \quad dX_t^{(i)} = \left( v_t^{(i)}(X_t^{(i)}) + \frac{\sigma_t^{(i)2}}{2} \nabla \log q_t^{(i)}(X_t^{(i)}) \right) dt + \sigma_t^{(i)} dW_t^{(i)} \quad (\text{A.4})$$

*or, equivalently, the ordinary differential equation (ODE):*

$$X_0^{(i)} \sim q_0^{(i)}, \quad dX_t^{(i)} = v_t^{(i)}(X_t^{(i)}) dt \quad (\text{A.5})$$

*where  $W_t^{(i)}$  is a Wiener process in  $\mathbb{R}^{d_i}$ ,  $s_t^{(i)}(x^{(i)}) := \nabla_{x^{(i)}} \log q_t^{(i)}(x^{(i)})$ ,  $x^{(i)} \in \mathbb{R}^{d_i}$  is the score function, and the fields  $v_t^{(i)}, s_t^{(i)} \in \mathcal{C}^1$  are measurable.*

*Let  $d = \max_i d_i$ ,  $\pi_i : \mathbb{R}^d \rightarrow \mathbb{R}^{d_i}$  be a linear projection map, and  $\iota_i : \mathbb{R}^{d_i} \rightarrow \mathbb{R}^d$  be a linear embedding map such that  $\pi_i \circ \iota_i = \text{Id}_i$ . For a vector field  $f^{(i)} : \mathbb{R}^{d_i} \rightarrow \mathbb{R}^{d_i}$ , define its canonical extension  $\tilde{f}^{(i)} : \mathbb{R}^d \rightarrow \mathbb{R}^d$  by  $\tilde{f}^{(i)} = \iota_i \circ f^{(i)} \circ \pi_i$ . For  $q_t^{(i)} : \mathbb{R}^{d_i} \rightarrow [0, \infty)$ , define the canonical lift  $\tilde{q}_t^{(i)} : \mathbb{R}^d \rightarrow [0, \infty)$  by  $\tilde{q}_t^{(i)} = q_t^{(i)} \circ \pi_i$ .*

*If the assumptions of definition A.1 hold, then, for any differentiable vector field  $v_t^* : \mathbb{R}^d \rightarrow \mathbb{R}^d$ , the stochastic process given by the following weighted SDE/ODE with  $s_t^*(X_t) := \sum_{i=1}^n \gamma_i(t) \tilde{s}_t^{(i)}(X_t)$ ,*

$$X_0 \sim p_0^*, w_0 = \mathbf{1}, \log q_0^{(i)}(X_0) : \text{standard gaussian density}$$

$$dX_t = \left( v_t^*(X_t) + \frac{\sigma_t^2}{2} s_t^*(X_t) \right) dt + \sigma_t dW_t \quad \text{or} \quad dX_t = v_t^*(X_t) dt$$

$$d \log \tilde{q}_t^{(i)}(X_t) = \left( -\nabla \cdot \tilde{v}_t^{(i)} + (v_t^* - \tilde{v}_t^{(i)}) \cdot \tilde{s}_t^{(i)} + \frac{\sigma_t^2}{2} \left( s_t^* \cdot \tilde{s}_t^{(i)} + \nabla \cdot \tilde{s}_t^{(i)} \right) \right) dt + \sigma_t \tilde{s}_t^{(i)} \cdot dW_t$$

*or*

$$d \log \tilde{q}_t^{(i)}(X_t) = \left[ -\nabla \cdot \tilde{v}_t^{(i)}(X_t) + (v_t^*(X_t) - \tilde{v}_t^{(i)}(X_t)) \cdot \tilde{s}_t^{(i)}(X_t) \right] dt$$

$$d \log w_t(X_t) = \left[ \nabla \cdot v_t^*(X_t) + \sum_{i=1}^n \dot{\gamma}_i(t) \log \tilde{q}_t^{(i)}(X_t) \right.$$

$$\left. + \sum_{i=1}^n \gamma_i(t) \left( -\nabla \cdot \tilde{v}_t^{(i)}(X_t) + (v_t^*(X_t) - \tilde{v}_t^{(i)}(X_t)) \cdot \tilde{s}_t^{(i)}(X_t) \right) \right] dt$$

*follows the probability path  $p_t^*(x) = \frac{1}{Z_t} \prod_{i=1}^n \left( \tilde{q}_t^{(i)}(x) \right)^{\gamma_i(t)}$ ,  $x \in \Omega_t$  where  $t \in [0, 1]$ ,*

*$\Omega_t := \text{supp}(p_t^*)$  and  $Z_t = \int_{\Omega_t} \prod_{i=1}^n \left( \tilde{q}_t^{(i)}(x) \right)^{\gamma_i(t)} dx$  is the normalizing constant only dependent on  $t$ .*

*Proof.* From eq. (A.5) (or, equivalently, eq. (A.4)), each probability path  $\{q_t^{(i)}\}_{t \in [0,1]}$  solves the Fokker-Planck PDE given by  $\partial_t q_t^{(i)} = -\nabla \cdot (v_t^{(i)} q_t^{(i)})$ . Dividing both sides by  $q_t^{(i)}$ , we get,

$$\partial_t \log q_t^{(i)} = -\nabla \cdot v_t^{(i)} - v_t^{(i)} \cdot s_t^{(i)} \quad (\text{A.6})$$

By the Leibniz product rule,

$$\frac{1}{Z_t} \partial_t \prod_{i=1}^n \left( \tilde{q}_t^{(i)} \right)^{\gamma_i(t)} = \frac{1}{Z_t} \partial_t \prod_{i=1}^n \exp \left( \gamma_i(t) \log \tilde{q}_t^{(i)} \right) = p_t^* \sum_{i=1}^n \left( \dot{\gamma}_i(t) \log \tilde{q}_t^{(i)} + \gamma_i(t) \partial_t \log \tilde{q}_t^{(i)} \right) \quad (\text{A.7})$$

We derive the unified Feynman-Kac PDE for the heterogeneous product  $\{p_t^*\}_{t \in [0,1]}$  by the following:

$$\partial_t \log p_t^* = \sum_{i=1}^n \left( \dot{\gamma}_i(t) \log \tilde{q}_t^{(i)} + \gamma_i \partial_t \log \tilde{q}_t^{(i)} \right) - \partial_t \log Z_t \quad (\text{A.8})$$

$$\stackrel{(\text{A.7})}{=} \sum_{i=1}^n \left( \dot{\gamma}_i(t) \log \tilde{q}_t^{(i)} + \gamma_i \partial_t \log \tilde{q}_t^{(i)} \right) - \int_{\Omega} p_t^* \sum_{i=1}^n \left( \dot{\gamma}_i(t) \log \tilde{q}_t^{(i)} + \gamma_i(t) \partial_t \log \tilde{q}_t^{(i)} \right) dx \quad (\text{A.9})$$

$$= -\nabla \cdot v_t^* - v_t^* \cdot s_t^* \quad (\text{A.10})$$

$$+ \nabla \cdot v_t^* + v_t^* \cdot s_t^* + \underbrace{\sum_{i=1}^n \left( \dot{\gamma}_i(t) \log \tilde{q}_t^{(i)} + \gamma_i \partial_t \log \tilde{q}_t^{(i)} \right)}_{=: g_t} \quad (\text{A.11})$$

$$- \mathbb{E}_{p_t^*} \left[ \sum_{i=1}^n \left( \dot{\gamma}_i(t) \log \tilde{q}_t^{(i)} + \gamma_i(t) \partial_t \log \tilde{q}_t^{(i)} \right) \right] \quad (\text{A.12})$$

$$= -\nabla \cdot v_t^* - v_t^* \cdot s_t^* + g_t - \mathbb{E}_{p_t^*} [g_t] \quad (\text{A.13})$$

where we used the boundary assumption from definition A.1 and the divergence theorem:

$$\mathbb{E}_{p_t^*} [\nabla \cdot v_t^* + v_t^* \cdot s_t^*] = \int_{\Omega_t} (\nabla \cdot v_t^*(x) + v_t^*(x) \cdot s_t^*(x)) p_t^*(x) dx \quad (\text{A.14})$$

$$= \int_{\Omega_t} \nabla \cdot (v_t^*(x) p_t^*(x)) dx = \int_{\partial \Omega_t} (v_t^*(x) \underbrace{p_t^*(x)}_{0 \text{ on } \partial \Omega_t}) \cdot d\mathbf{S} = 0 \quad (\text{A.15})$$

Multiplying  $p_t^*$  on both sides of eq. (A.13) yields:

$$\partial_t p_t^* = -\nabla \cdot (v_t^* p_t^*) + p_t^* (g_t - \mathbb{E}_{p_t^*} [g_t]) \quad (\text{A.16})$$

where

$$g_t = \nabla \cdot v_t^* + v_t^* \cdot s_t^* + \sum_{i=1}^n \left( \dot{\gamma}_i(t) \log \tilde{q}_t^{(i)} + \gamma_i \partial_t \log \tilde{q}_t^{(i)} \right) \quad (\text{A.17})$$

$$= \nabla \cdot v_t^* + v_t^* \cdot s_t^* + \sum_{i=1}^n \left( \dot{\gamma}_i(t) \log \tilde{q}_t^{(i)} + \gamma_i (-\nabla \cdot v_t^{(i)} - v_t^{(i)} \cdot s_t^{(i)}) \right) \quad (\text{A.18})$$

$$= \nabla \cdot v_t^* + \sum_{i=1}^n \dot{\gamma}_i(t) \log \tilde{q}_t^{(i)} + \sum_{i=1}^n \gamma_i \left( -\nabla \cdot \tilde{v}_t^{(i)} + (v_t^* - \tilde{v}_t^{(i)}) \cdot \tilde{s}_t^{(i)} \right) \quad (\text{A.19})$$

We can obtain the value of  $\log \tilde{q}_t^{(i)}(X_t)$  by simulating an ODE (if  $X_t$  follows an ODE) or an SDE (if  $X_t$  follows an SDE).

$$\partial_t \log \tilde{q}_t^{(i)} = -\nabla \cdot \tilde{v}_t^{(i)} - \tilde{v}_t^{(i)} \cdot \tilde{s}_t^{(i)} \quad (\text{A.20})$$

**ODE case:**  $dX_t = v_t^*(X_t) dt$

$$\frac{d}{dt} \log \tilde{q}_t^{(i)}(X_t) = \partial_t \log \tilde{q}_t^{(i)}(x = X_t) + \nabla \log \tilde{q}_t^{(i)}(x = X_t) \cdot \frac{dX_t}{dt} \quad (\text{A.21})$$

$$= -\nabla \cdot \tilde{v}_t^{(i)}(X_t) + (v_t^*(X_t) - \tilde{v}_t^{(i)}(X_t)) \cdot \tilde{s}_t^{(i)}(X_t) \quad (\text{A.22})$$

**SDE case:**  $dX_t = \left( v_t^*(X_t) + \frac{\sigma_t^2}{2} s_t^*(X_t) \right) dt + \sigma_t dW_t$

For the SDE case, we must use Itô's formula to find the differential  $d \log \tilde{q}_t^{(i)}(X_t)$ . Given the function  $f(t, x)$  and the SDE for  $X_t$  above, Itô's formula states that

$$df(t, X_t) = \left( \partial_t f + \mu_t \cdot \nabla_X f + \frac{1}{2} \text{Tr}(\Sigma_t^\top \nabla_X^2 f \Sigma_t) \right) dt + (\nabla_X f)^\top \Sigma_t dW_t,$$

where  $f(t, X_t) = \log \tilde{q}_t^{(i)}(X_t)$ ,  $\mu_t = v_t^* + \frac{\sigma_t^2}{2} s_t^*$ , and  $\Sigma_t = \sigma_t I$ .

Applying that  $\nabla_X f = \nabla_X \log \tilde{q}_t^{(i)} = \tilde{s}_t^{(i)}$ ,  $\frac{1}{2} \text{Tr}(\Sigma_t^\top \nabla_X^2 f \Sigma_t) = \frac{\sigma_t^2}{2} \Delta_X f = \frac{\sigma_t^2}{2} \nabla \cdot \tilde{s}_t^{(i)}$ :

$$d \log \tilde{q}_t^{(i)}(X_t) = \left( -\nabla \cdot \tilde{v}_t^{(i)} + (v_t^* - \tilde{v}_t^{(i)}) \cdot \tilde{s}_t^{(i)} + \frac{\sigma_t^2}{2} \left( s_t^* \cdot \tilde{s}_t^{(i)} + \nabla \cdot \tilde{s}_t^{(i)} \right) \right) dt + \sigma_t \tilde{s}_t^{(i)} \cdot dW_t \quad (\text{A.23})$$

By Proposition A.1, we can sample from  $p_t^*$  by simulating the following weighted SDE or ODE starting from  $X_0 \sim p_0^*$ ,  $w_0 = 1$ :

$$\text{SDE: } dX_t = \left( v_t^*(X_t) + \frac{\sigma_t^2}{2} s_t^*(X_t) \right) dt + \sigma_t dW_t, \quad d \log w_t = g_t(X_t) dt \quad (\text{A.24})$$

$$\text{ODE: } dX_t = v_t^*(X_t) dt, \quad d \log w_t = g_t(X_t) dt \quad (\text{A.25})$$

Our result extends, subsumes, and unifies prior formulations (Skreta et al. (2025a); Mark et al. (2025)) in the literature.  $\square$

**Remark. Interpretation.** The auxiliary weight process ( $w_t$ ) plays the role of a *likelihood ratio corrector*: it accounts for the discrepancy between the law induced by the forward dynamics ( $X_t$ ) and the target density  $p_t^*$ . In other words, although the marginal of  $X_t$  alone may not coincide with  $p_t^*$ , the pair  $(X_t, w_t)$  ensures unbiased recovery of expectations under  $p_t^*$  via Proposition A.1. This extends and unifies earlier formulations of weighted Feynman–Kac dynamics in the literature (Skreta et al., 2025a; Mark et al., 2025).

**Remark. Practical simulation.** From an algorithmic perspective, the weighted SDE/ODE requires no additional training or architecture-specific modifications. Practitioners only need to simulate sample paths ( $X_t$ ) according to the chosen dynamics and accumulate weights via the exponential update  $d \log w_t = g_t(X_t) dt$ . In practice, this can be carried out efficiently with Sequential Monte Carlo (SMC) or particle filtering methods, where the weights  $w_t$  play the usual role of importance weights.

Although the heterogeneous Feynman–Kac framework (Theorem A.1) may appear abstract, its input–output structure is remarkably simple: given the forward dynamics and score functions  $\{v_t^{(i)}, s_t^{(i)}\}_i$ , one can simulate particles  $(X_t, w_t)$  and obtain unbiased estimators for expectations under  $p_t^*$ . This makes the method broadly applicable without architectural constraints such as attention-map control or model-specific fine-tuning.

## A.2 ALGORITHMIC FORMULATIONS AND COMPARISON: FKC VS. ACE

Reviewer  
jeuE,  
naNy

Here, we present the algorithmic tables for FKC and ACE. As the tables indicate, FKC arises as a special case of ACE when the gamma schedule is constant. This results in an extra update for log  $q$  components, which is needed because  $\dot{\gamma}_i(t) \neq 0$ .

**Algorithm 1** Adaptive Correction with Exponents (ACE, Ours)**Require:**

- Batch size  $N$ , initial particles  $X_0^j \sim p_0^*$ , weights  $w_0^j = 1/N$
- Networks: scores  $s_{\theta_i}^{(i)}$  and velocities  $v_{\theta_i}^{(i)}$  for the paths  $q_t^{(i)}$
- Projection  $\pi_i$ , embedding  $\iota_i$ , **time-varying exponents**  $\gamma_i(t)$
- Base drift  $v_\phi^*$ , noise schedule  $\sigma_t$ , steps  $T$ , resampling threshold  $\tau$

- 1:  $\Delta t \leftarrow 1/T$
- 2: **for**  $t = 0, \Delta t, \dots, 1 - \Delta t$  **do**
- 3:   **Mixture score:**  $s_t^*(x) = \sum_{i=1}^n \gamma_i(t) \tilde{s}_t^{(i)}(x)$  with  $\tilde{s}_t^{(i)}(x) = \iota_i(s_{\theta_i}^{(i)}(\pi_i(x), t))$ .
- 4:   **Drift:**  $\mu_t(x) = v_\phi^*(x, t) + \frac{\sigma_t^2}{2} s_t^*(x)$
- 5:   **Component drift correction** with  $\tilde{v}_t^{(i)}(x) = \iota_i(v_{\theta_i}^{(i)}(\pi_i(x), t))$ :
 
$$D_t^{(i)}(x) = -\nabla \cdot \tilde{v}_t^{(i)}(x) + (v_\phi^*(x, t) - \tilde{v}_t^{(i)}(x)) \cdot \tilde{s}_t^{(i)}(x),$$
- 6:   **for**  $j = 1, \dots, N$  **do**
- 7:     **Propagate particle:**  $X_{t+\Delta t}^j = X_t^j + \mu_t(X_t^j)\Delta t + \sigma_t\sqrt{\Delta t}\xi_t^j$ ,  $\xi_t^j \sim \mathcal{N}(0, I)$
- 8:     **Update log-components:**  $\log q_{t+\Delta t}^{(i),j} = \log q_t^{(i),j} + \Delta \log q_t^{(i),j} \Delta t$  with
 
$$\Delta \log q_t^{(i),j} = D_t^{(i)}(X_t^j) + \frac{\sigma_t^2}{2} \left( s_t^* \cdot \tilde{s}_t^{(i)} + \nabla \cdot \tilde{s}_t^{(i)} \right) + \sigma_t \tilde{s}_t^{(i)} \cdot \xi_t^j \sqrt{\Delta t}$$
- 9:     **Update weight:**  $\log w_{t+\Delta t}^j = \log w_t^j + \Delta \log w_t^j \Delta t$  with
 
$$\Delta \log w_t^j = \nabla \cdot v_\phi^*(X_t^j, t) + \sum_{i=1}^n \dot{\gamma}_i(t) \log q_t^{(i),j} + \sum_{i=1}^n \gamma_i(t) D_t^{(i)}(X_t^j)$$
- 10:   **end for**
- 11:   Compute Effective Sample Size (ESS) =  $\frac{(\sum_j w_{t+\Delta t}^j)^2}{\sum_j (w_{t+\Delta t}^j)^2}$
- 12:   **if**  $\text{ESS} < \tau N$  **then**
- 13:     Resample particles according to  $\left\{ \frac{w_{t+\Delta t}^j}{\sum_j w_{t+\Delta t}^j} \right\}$
- 14:     Reset  $w_{t+\Delta t}^j = 1/N$
- 15:   **end if**
- 16: **end for**

**Algorithm 2** Feynman–Kac Corrector (FKC, (Skreta et al., 2025a))**Require:**

- Batch size  $N$ , initial particles  $X_0^j \sim p_0^*$ , weights  $w_0^j = 1/N$
- Pretrained component networks: scores  $s_{\theta_i}^{(i)}$  and velocities  $v_{\theta_i}^{(i)}$  for  $q_t^{(i)}$
- Projections  $\pi_i$ , embeddings  $\iota_i$ , constant exponents  $\gamma_i$
- Base drift  $v_\phi^*(x, t)$ , noise schedule  $\sigma_t$ , total steps  $T$ , resampling threshold  $\tau$

1:  $\Delta t \leftarrow 1/T$   
 2: **for**  $t = 0, \Delta t, \dots, 1 - \Delta t$  **do**  
 3:   **Mixture score:**  $s_t^*(x) = \sum_{i=1}^n \gamma_i \tilde{s}_t^{(i)}(x)$  with  $\tilde{s}_t^{(i)}(x) = \iota_i(s_{\theta_i}^{(i)}(\pi_i(x), t))$ .

4:   **Drift:**  $\mu_t(x) = v_\phi^*(x, t) + \frac{\sigma_t^2}{2} s_t^*(x)$

5:   **Component drift correction** with  $\tilde{v}_t^{(i)}(x) = \iota_i(v_{\theta_i}^{(i)}(\pi_i(x), t))$ :

$$D_t^{(i)}(x) = -\nabla \cdot \tilde{v}_t^{(i)}(x) + (v_\phi^*(x, t) - \tilde{v}_t^{(i)}(x)) \cdot \tilde{s}_t^{(i)}(x),$$

6:   **for**  $j = 1, \dots, N$  **do**

7:     **Propagate particle:**  $X_{t+\Delta t}^j = X_t^j + \mu_t(X_t^j)\Delta t + \sigma_t\sqrt{\Delta t}\xi_t^j$ ,     $\xi_t^j \sim \mathcal{N}(0, I)$

8:     **Update weight:**  $\log w_{t+\Delta t}^j = \log w_t^j + \Delta \log w_t^j \Delta t$  with

$$\Delta \log w_t^j = \nabla \cdot v_\phi^*(X_t^j, t) + \sum_{i=1}^n \gamma_i D_t^{(i)}(X_t^j)$$

9:   **end for**

10:   Compute Effective Sample Size (ESS) =  $\frac{(\sum_j w_{t+\Delta t}^j)^2}{\sum_j (w_{t+\Delta t}^j)^2}$

11:   **if** ESS  $< \tau N$  **then**

12:     Resample particles according to  $\left\{ \frac{w_{t+\Delta t}^j}{\sum_j w_{t+\Delta t}^j} \right\}$

13:     Reset  $w_{t+\Delta t}^j = 1/N$

14:   **end if**

15: **end for**

*Remark. Remark on computability vs. validity.* The FKC algorithm remains numerically computable even when Marginal Path Collapse occurs: the mixed score  $s_t^*$  and the update rules in Algorithm 2 produce finite values at every step. However, this computability does *not* imply that the algorithm is sampling from a valid probability model. FKC is theoretically justified only when the target path  $p_t^*(x) \propto h_t(x)$  exists as a family of *normalizable* densities for all  $t$  on the discretization grid. If for some  $t^*$  the ratio-of-densities integrand  $h_{t^*}$  fails to lie in  $L^1$  (i.e.  $Z_{t^*} = \int h_{t^*} = \infty$ ), then  $p_{t^*}^*$  does not exist, and the drift field  $s_{t^*}^*$  used by FKC is no longer the score of any probability density. As a result, the reverse SDE/ODE and the weighted Feynman–Kac dynamics no longer transport the intended ratio-of-densities path  $\{p_t^*\}$ : instead they follow a different density path  $\{p_t'\}$  determined by their coefficients. **Even though the sampler remains numerically well-defined, its terminal law  $p_t'$  is no longer equal to the desired target  $p_1^*$ .**

Under standard regularity assumptions on the drift and diffusion, the Fokker–Planck equation associated with a given SDE has a unique weak solution for each initial probability density. Therefore, if there exists  $t_c$  with  $h_{t_c} \notin L^1$  (Marginal Path Collapse), there is no probability path  $\{p_t^*\}$  that both (i) coincides with  $h_t/Z_t$  whenever  $h_t \in L^1$  and (ii) solves the same Fokker–Planck equation globally. The path produced by FKC,  $\{p_t'\}$ , is hence a different solution induced by its own initial condition and cannot coincide with the intended ratio-of-densities path.

Empirically, in every heterogeneous setting we tested, violation of the path-existence criterion (Theorem 2.1) leads FKC to complete failure (typically through unstable or degenerate importance weights) despite the algorithm itself producing finite updates. This behavior is exactly the Marginal Path Collapse phenomenon. Our path-existence criterion characterizes when  $Z_t < \infty$  holds, and Theorem 2.2 shows how ACE constructs corrected exponent schedules ensuring that the entire path  $\{p_t^*\}_{t \in [0,1]}$  is well-defined, allowing the weighted SDE established in Theorem 2.3 and Algorithm 1 to provide unbiased samples from the desired target.

## B INTEGRABILITY PRESERVATION ALONG STOCHASTIC PATHS

The problem of preserving integrability for ratios of products of densities along stochastic paths is non-trivial. While general ratios can exhibit pathological behavior where integrability is lost, imposing a structural condition of component-wise dominance for GMMs, or positivity of a simple criterion for compactly supported densities, is sufficient to prevent such failures. This section demonstrates that under these conditions, integrability, once established at endpoints, is maintained throughout the evolution.

### B.1 MATHEMATICAL PRELIMINARIES

**Definition B.1** (Generative Stochastic Path for Stochastic Interpolants). Let  $X_0 \sim \mathcal{N}(0, \mathbf{I})$  and  $X_1 \sim p_1(x)$  be independent random variables. A **generative stochastic path** is a time-indexed random variable  $X_t$  for  $t \in [0, 1]$  defined by the sample-wise interpolation:

$$X_t = \alpha_t X_0 + \beta_t X_1 \quad (\text{B.1})$$

where  $\alpha_t, \beta_t$  are non-negative, differentiable functions of  $t$  satisfying the boundary conditions  $\alpha_0 = 1, \beta_0 = 0$  and  $\alpha_1 = 0, \beta_1 = 1$ .

*Remark* (Ornstein-Uhlenbeck Process and Flow Matching as Special Cases of Stochastic Interpolants). The generalized path encompasses the two most common paths in generative modeling.

- **Flow Matching (Linear Path):** Setting  $\alpha_t = 1 - t$  and  $\beta_t = t$  gives the linear interpolation path  $X_t = (1 - t)X_0 + tX_1$ .
- **Diffusion Models (OU-like Path):** Setting  $\alpha_t = e^{-\int_0^t \gamma(s)ds}$  and  $\beta_t = \sqrt{1 - e^{-2\int_0^t \gamma(s)ds}}$  corresponds to the path generated by an Ornstein-Uhlenbeck process, commonly used in diffusion models.

Our results hold for the general path, which includes these specific cases.

**Lemma B.1** (The relationship between the velocity and score). Suppose  $v_t(x)$  is a locally Lipschitz vector field which generates the probability path  $p_t$  between  $p_0 \sim \mathcal{N}(0, I)$  and  $p_1$  with differentiable schedules  $\alpha_t, \beta_t$  such that  $X_t = \alpha_t X_0 + \beta_t X_1 \sim p_t$ . Then the score can be expressed as a function of the velocity field by:

$$\nabla \log p_t(x) = \frac{1}{\alpha_t \left( \frac{\dot{\beta}_t}{\beta_t} \alpha_t - \dot{\alpha}_t \right)} \left( v_t(x) - \frac{\dot{\beta}_t}{\beta_t} x \right) \quad (\text{B.2})$$

Specifically, for  $\alpha_t = 1 - t, \beta_t = t$  (Flow Matching), the score can be expressed as

$$\nabla \log p_t(x) = \frac{tv_t(x) - x}{1 - t} \quad (\text{B.3})$$

*Proof.* The proof can be found in **B.4** of Domingo-Enrich et al. (2024).  $\square$

**Lemma B.2** (Sum of Independent Random Variables). Let  $A$  and  $B$  be two independent random variables in  $\mathbb{R}^d$  with probability density functions  $p_A(a)$  and  $p_B(b)$ , respectively. The probability density function of their sum,  $C = A + B$ , is given by the convolution of their individual PDFs:

$$p_C(c) = (p_A * p_B)(c) = \int_{\mathbb{R}^d} p_A(y)p_B(c - y)dy \quad (\text{B.4})$$

*Proof.* The proof can be found in Chapter 6 of Ross et al. (1998).  $\square$

**Proposition B.1** (Distribution Along the Path of the Stochastic Interpolant). *The probability density function  $p_t(x)$  of the random variable  $X_t = \alpha_t X_0 + \beta_t X_1$  is given by the convolution of the scaled final density with a Gaussian kernel:*

$$p_t(x) = \left( \frac{1}{\beta_t^d} p_1 \left( \frac{\cdot}{\beta_t} \right) \right) * \mathcal{N}(x | \mathbf{0}, \alpha_t^2 \mathbf{I}) \quad (\text{B.5})$$

*Proof.*  $X_t$  is the sum of two independent random variables:  $A = \alpha_t X_0$  and  $B = \beta_t X_1$ . The density of  $A$  is  $\mathcal{N}(x | \mathbf{0}, \alpha_t^2 \mathbf{I})$ . The density of  $B$  is  $\frac{1}{\beta_t^d} p_1(\frac{x}{\beta_t})$ . By lemma B.2, the density of their sum  $X_t$  is the convolution of their respective densities.  $\square$

**Lemma B.3** (Integrability of Exponential Functions with Quadratic Exponents). *Let*

$$f(x) = \exp\left(-\frac{1}{2}x^\top A x + b^\top x + c\right)$$

*be an exponential function with a quadratic exponent, where  $A \in \mathbb{R}^{d \times d}$  is symmetric. Then  $f \in L^1(\mathbb{R}^d)$  if and only if  $A \succ 0$ .*

*Proof.* ( $\Rightarrow$ ) If  $A \succ 0$ , then  $-\frac{1}{2}x^\top A x$  dominates the linear term  $b^\top x$ , so  $f(x)$  is bounded by a Gaussian density and is therefore integrable over  $\mathbb{R}^d$ . ( $\Leftarrow$ ) Suppose  $A \not\succ 0$ . Then there exists a unit eigenvector  $v$  of  $A$  with eigenvalue  $\lambda \leq 0$ . Decompose  $x = tv + y$  with  $y \perp v$ ; in this orthogonal basis the exponent becomes

$$-\frac{1}{2}\lambda t^2 + b_1 t - \frac{1}{2}y^\top A_\perp y + b_\perp^\top y.$$

Consider integrating  $f$  over the unbounded tube

$$\mathcal{C}_r = \{(t, y) : \|y\| \leq r\}, \quad r > 0.$$

If  $\lambda < 0$ , the term  $-\frac{1}{2}\lambda t^2$  grows *positively* and the integral diverges. If  $\lambda = 0$ , then the exponent along the  $t$ -direction is at most linear: If  $b_1 \neq 0$ , the integrand grows (or decays too slowly) linearly; if  $b_1 = 0$ , the integrand has no decay along  $t$ . In either case the integral over  $\mathcal{C}_r$  diverges. Hence  $f \notin L^1(\mathbb{R}^d)$  whenever  $A$  is not positive definite.  $\square$

## B.2 COMPACTLY SUPPORTED DISTRIBUTIONS

We consider compactly supported densities, a condition satisfied by the vast majority of real-world data. Examples include:

- **Images/Videos:** Pixel values are bounded, typically in a hypercube like  $[0, 1]^{H \times W \times C}$ . Videos are a sequence of images spread across the time dimension  $T$ , bounded in a hypercube of even higher dimension, like  $[0, 1]^{H \times W \times C \times T}$ .
- **3D Molecules/Shapes:** Atomic coordinates are constrained within a finite volume centered at the center of mass.

**Proposition B.2** (Isotropic Gaussian to Compactly Supported Target Density). *Let  $p_0(x) = \mathcal{N}(x; 0, \sigma_0^2 \mathbf{I})$  and let  $p_1$  be a probability density with compact support in  $\mathbb{R}^d$ . Let  $\{p_t\}_{t \in [0, 1]}$  be the probability path generated by stochastic interpolant  $X_t = \alpha_t X_0 + \beta_t X_1$ . Then, for any  $t \in [0, 1]$ , there exist finite positive constants  $0 < C_\pm, \mu_t, V_t, R_t < \infty$  such that  $p_t(x)$  is bounded by Gaussian envelopes:*

$$C_- \exp\left(\frac{-\|x - \mu_t\|^2 + \|\mu_t\|^2 - V_t}{2\alpha_t^2 \sigma_0^2}\right) \leq p_t(x) \leq C_+ \exp\left(\frac{-(\|x\| - R_t)^2 + R_t^2}{2\alpha_t^2 \sigma_0^2}\right)$$

Reviewer  
gBQy

*Proof.* Let  $\mathcal{N}_t(x) = \mathcal{N}(x; 0, \sigma_t^2 I)$  be the density of  $\alpha_t X_0$ , where  $\sigma_t^2 = \alpha_t^2 \sigma_0^2$ . Let  $\rho_t(y)$  be the density of  $Y_t = \beta_t X_1$ . Since  $p_1$  is compactly supported,  $\rho_t$  is supported on a compact set  $\Omega_t$ . The path density is the convolution  $p_t = \mathcal{N}_t * \rho_t$ . We analyze the ratio  $p_t(x)/\mathcal{N}_t(x)$ :

$$\frac{p_t(x)}{\mathcal{N}_t(x)} = \int_{\Omega_t} \frac{\mathcal{N}_t(x-y)}{\mathcal{N}_t(x)} \rho_t(y) dy = \int_{\Omega_t} \exp\left(\frac{2x \cdot y - \|y\|^2}{2\sigma_t^2}\right) \rho_t(y) dy = \mathbb{E}_{Y \sim \rho_t} \left[ \exp\left(\frac{2x \cdot Y - \|Y\|^2}{2\sigma_t^2}\right) \right].$$

**Upper Bound:** Let  $R_t = \sup_{y \in \Omega_t} \|y\| < \infty$ . Using Cauchy-Schwarz,  $2x \cdot y - \|y\|^2 \leq 2\|x\|R_t$ . Thus,

$$p_t(x) \leq \mathcal{N}_t(x) \exp\left(\frac{2\|x\|R_t}{2\sigma_t^2}\right) = \frac{1}{(2\pi\sigma_t^2)^{d/2}} \exp\left(\frac{-\|x\|^2 + 2\|x\|R_t}{2\sigma_t^2}\right).$$

Completing the square in the exponent yields the form in the proposition statement.

**Lower Bound:** We apply Jensen's inequality ( $\mathbb{E}[e^Z] \geq e^{\mathbb{E}[Z]}$ ). Let  $\mu_t = \mathbb{E}[Y]$  and  $V_t = \mathbb{E}[\|Y\|^2]$ .

$$\frac{p_t(x)}{\mathcal{N}_t(x)} \geq \exp\left(\mathbb{E}_{Y \sim \rho_t} \left[ \frac{2x \cdot Y - \|Y\|^2}{2\sigma_t^2} \right]\right) = \exp\left(\frac{2x \cdot \mu_t - V_t}{2\sigma_t^2}\right).$$

Multiplying by  $\mathcal{N}_t(x)$  and rearranging terms yields the lower bound.  $\square$

*Remark.* The compact support assumption is crucial. It ensures  $R_t < \infty$  (valid upper bound) and the existence of all moments  $\mu_t, V_t$  (valid lower bound). For heavy-tailed target distributions (e.g., Cauchy), these moments may not exist, invalidating the lower bound.

**Theorem B.1** (Integrability Preservation Condition for Compactly Supported Targets). *For each  $i \in \{1, \dots, n\}$ , let  $\{q_t^{(i)}\}_{t \in [0,1]}$  be probability paths in  $\mathbb{R}^{d_i}$  generated by  $X_t^{(i)} = \alpha_t^{(i)} X_0^{(i)} + \beta_t^{(i)} X_1^{(i)}$  where  $X_0^{(i)} \sim q_0^{(i)} = \mathcal{N}(0, I)$  and  $X_1^{(i)} \sim q_1^{(i)}$  has compact support. Let  $d := \max_i d_i$  and  $\gamma_i(t) \in \mathbb{R}$  for  $t \in [0, 1]$ .*

*Let  $\pi_i : \mathbb{R}^d \rightarrow \mathbb{R}^{d_i}$  be projections onto coordinate sets  $I_i^a$ . Define the lifted product*

$$h_t(x) := \prod_{i=1}^n (\tilde{q}_t^{(i)}(\pi_i(x)))^{\gamma_i(t)}$$

*If  $h_1(x)$  is integrable and for every coordinate  $k \in \{1, \dots, d\}$  and all  $t \in [0, 1)$ ,*

$$C_k(t) := \sum_{i: k \in I_i} \frac{\gamma_i(t)}{(\alpha_t^{(i)})^2} > 0, \quad (\text{B.6})$$

*then  $\{h_t\}_{t \in [0,1]}$  has the path existence property (i.e.,  $h_t \in L^1(\mathbb{R}^d)$  for all  $t \in [0, 1]$ ).*

*Conversely, if there exists a coordinate  $k^* \in \{1, \dots, d\}$  and  $t^* \in [0, 1)$  such that  $C_{k^*}(t^*) < 0$ , then  $\{h_t\}_{t \in [0,1]}$  is not integrable at  $t^*$  (Marginal Path Collapse).*

<sup>a</sup>We can write  $\pi_i(x_1, \dots, x_d) = (x_{k_1}, \dots, x_{k_{d_i}})$ . Let  $I_i := \{k_1, \dots, k_{d_i}\}$  be the set of coordinate indices that  $\pi_i$  projects onto. Lifted densities are  $\tilde{q}_t^{(i)} = q_t^{(i)} \circ \pi_i$ .

*Proof.* **1. Sufficiency for path existence.**

**Endpoint ( $t = 1$ ):** Integrability of  $h_1$  holds by assumption.

**Interval  $t \in [0, 1)$ :** We construct an integrable upper bound. Applying Proposition B.2 to the lifted densities  $\tilde{q}_t^{(i)}(x) = q_t^{(i)}(\pi_i(x))$ , we use the upper bound formula for  $\gamma_i(t) > 0$  and the lower bound formula for  $\gamma_i(t) < 0$  (since negative exponents reverse the inequality).

$$h_t(x) \leq \prod_{\gamma_i > 0} \left( C_{+,i} e^{\frac{-\|\pi_i(x)\|^2 + 2\|\pi_i(x)\|R_t^{(i)}}{2(\alpha_t^{(i)})^2}} \right)^{\gamma_i} \prod_{\gamma_i < 0} \left( C_{-,i} e^{\frac{-\|\pi_i(x) - \mu_t^{(i)}\|^2 + \|\mu_t^{(i)}\|^2 - V_t^{(i)}}{2(\alpha_t^{(i)})^2}} \right)^{\gamma_i}$$

The integrability is determined by the coefficient of the quadratic term  $\|x\|^2$  in the exponent. Expanding  $\|\pi_i(x)\|^2 = \sum_{k \in I_i} x_k^2$ , the aggregate quadratic term in the exponent is:

$$\sum_{i=1}^n \gamma_i(t) \left( -\frac{\|\pi_i(x)\|^2}{2(\alpha_t^{(i)})^2} \right) = -\frac{1}{2} \sum_{i=1}^n \sum_{k \in I_i} \frac{\gamma_i(t)}{(\alpha_t^{(i)})^2} x_k^2 = -\frac{1}{2} \sum_{k=1}^d \left( \sum_{i: k \in I_i} \frac{\gamma_i(t)}{(\alpha_t^{(i)})^2} \right) x_k^2. \quad (\text{B.7})$$

By Condition B.6, the coefficient for every  $x_k^2$  is strictly negative. Thus, the upper bound behaves as  $\exp(-\frac{1}{2}x^\top \Lambda_t x + O(\|x\|))$  with positive definite  $\Lambda_t$ , ensuring integrability (Lemma B.3).

## 2. Sufficiency for Marginal Path Collapse at $t^*$ .

We construct a diverging lower bound. Applying Proposition B.2 using the lower bound formula for  $\gamma_i(t) > 0$  and the upper bound formula for  $\gamma_i(t) < 0$ , we derive:

$$h_t(x) \geq \prod_{\gamma_i > 0} \left( C_{-,i} e^{\frac{-\|\pi_i(x) - \mu_t^{(i)}\|^2 + \|\mu_t^{(i)}\|^2 - V_t^{(i)}}{2(\alpha_t^{(i)})^2}} \right)^{\gamma_i} \prod_{\gamma_i < 0} \left( C_{+,i} e^{\frac{-\|\pi_i(x)\|^2 + 2\|\pi_i(x)\| R_t^{(i)}}{2(\alpha_t^{(i)})^2}} \right)^{\gamma_i}$$

The quadratic term in exponent is precisely equation B.7 since the quadratic terms are the same for both upper and lower bounds in Proposition B.2. Thus, the exponent can be written as  $-\frac{1}{2}x^\top A x + D(x)$ , where  $A$  is a diagonal matrix with entries  $A_{jj} = \sum_{i: k \in I_i} \frac{\gamma_i(t)}{(\alpha_t^{(i)})^2}$ , and  $D(x)$  collects the linear and constant terms. At time  $t^*$ , since  $A_{k^*k^*} < 0$ , the matrix  $A$  is not positive definite ( $A \not\prec 0$ ), and by Lemma B.3, the lower bound diverges, leading to Marginal Path Collapse.  $\square$

*Remark.* As a consequence of Theorem B.1 (sufficiency), the path  $p_t^* = h_t/Z_t$ ,  $t \in [0, 1]$  with  $Z_t = \int_{\mathbb{R}^d} h_t(x) dx$  is well defined on  $\mathbb{R}^d$ , establishing the conditions for ACE (Theorem A.1).

## B.3 ADAPTIVE EXPONENTS AND BUMP FUNCTION CORRECTIONS

If the criterion in Theorem B.1 is violated, we can adapt the exponents  $\gamma_i(t)$  to restore integrability. We present two cases: the general continuous case and the practical discretized case.

**Theorem B.2** (Adaptive Exponents). *Let  $\alpha_t^{(i)}$  be differentiable on  $[0, 1]$  with  $\alpha_0^{(i)} = 1, \alpha_1^{(i)} = 0$ , and  $\alpha_t^{(i)} > 0$  for  $t \in (0, 1)$ . Let  $\gamma_i(t)$  be the linear interpolation of fixed boundary values  $\gamma_i(0), \gamma_i(1)$  such that*

$$S(t, \{\gamma_i\}_i) := \sum_{i=1}^n \frac{\gamma_i(t)}{(\alpha_t^{(i)})^2}$$

*satisfies  $S(0, \{\gamma_i\}_i) > 0$  and  $\lim_{t \rightarrow 1^-} S(t, \{\gamma_i\}_i) > 0$ .*

*Then, there exist differentiable functions  $\tilde{\gamma}_i(t)$  satisfying the boundary conditions such that  $S(t, \{\tilde{\gamma}_i\}_i) > 0$  for all  $t \in [0, 1)$ .*

*Proof.* We prove by constructing a working solution. Note that the solution is not unique.

**Step 1.** First check if the default solution (linear interpolation of boundary values),  $\gamma_i(t) = t\gamma_i(0) + (1-t)\gamma_i(1)$  for all  $i$  satisfies  $S(t, \{\gamma_i\}_i) > 0 \forall t$ . If so, we are done. If not, we may construct a valid solution in a single corrective step.

**Step 2.** If  $\gamma_i$  fails, it is because  $\exists t \in (0, 1)$  such that  $S(t, \{\gamma_i\}_i) \leq 0$ .

1. Find the time  $t_{\min}$  where the sum  $S(t, \{\gamma_i\}_i)$  is at its minimum. We can ensure that this exists, since there exists  $\delta_1, \delta_2 > 0$  such that  $\forall t \in [0, \delta_1) \cup (\delta_2, 1)$ ,  $S(t, \{\gamma_i\}_i) > 0$ . This comes from our assumption  $S(0, \{\gamma_i\}_i) > 0, \lim_{t \rightarrow 1^-} S(t, \{\gamma_i\}_i) > 0$  and the continuity of  $S(t, \{\gamma_i\}_i)$  with respect to  $t$ . Then,  $S(t, \{\gamma_i\}_i)$  is a continuous function on a compact set  $[\delta_1, \delta_2]$  which admits a maximum and minimum value. Since the negative values of  $S(t, \{\gamma_i\}_i)$  are all contained in the compact set  $[\delta_1, \delta_2]$ ,  $\exists t_{\min} \in [\delta_1, \delta_2]$  such that

$$S_{\min} := \min_{t \in [0, 1]} S(t, \{\gamma_i\}_i) = \min_{t \in [\delta_1, \delta_2]} S(t, \{\gamma_i\}_i) = S(t_{\min}, \{\gamma_i\}_i)$$

- 1512 2. Define the **bump function** by  $b(t) = t(1 - t)$  such that  $b(0) = b(1) = 0$  and  $b(t)$  is always  
 1513 nonnegative on  $[0, 1]$ . We denote the minimum value of  $b(t)$  on  $t \in [\delta_1, \delta_2]$  by  $b_{\min} > 0$ .  
 1514
- 1515 3. We will choose the index  $j$  such that  $\frac{\gamma_j(t_{\min})}{(\alpha_t^{(j)})^2}$  is the largest. This will have a greater positive  
 1516 impact when the denominator is small.  
 1517
- 1518 4. Let  $c_{\min} := \min_{t \in [\delta_1, \delta_2]} b_{\min}/(\alpha_t^{(j)})^2$ . This exists and is positive since  $\alpha_t^{(j)}$  is positive and  
 1519 continuous on  $[\delta_1, \delta_2]$ . We also have the inequality,  
 1520

$$1521 c_{\min} \leq \frac{b(t)}{(\alpha_t^{(j)})^2} \quad \forall t \in [\delta_1, \delta_2]$$

- 1522
- 1523
- 1524 5. Finally, define the **adaptive exponent** via  $\tilde{\gamma}_j(t) := \gamma_j(t) + B \cdot b(t)$  where

$$1525 B = \left( \frac{|S_{\min}|}{c_{\min}} + 1 \right)$$

1526 All other functions are preserved:  $\tilde{\gamma}_i = \gamma_i \quad \forall i \neq j$ .  
 1527

1528 Now we verify that  $S(t, \{\tilde{\gamma}_i\}_i)$  with our adaptive exponent  $\tilde{\gamma}_j(t)$  is strictly positive for all  $t \in [0, 1]$ .  
 1529 For  $t \in [0, \delta_1) \cup (\delta_2, 1]$ ,  $S(t, \{\tilde{\gamma}_i\}_i) \geq S(t, \{\gamma_i\}_i) > 0$  is already positive. For  $t \in [\delta_1, \delta_2]$ ,

$$1530 S(t, \{\tilde{\gamma}_i\}_i) = S(t, \{\gamma_i\}_i) + \left( \frac{|S_{\min}|}{c_{\min}} + 1 \right) \frac{b(t)}{(\alpha_t^{(j)})^2} \geq S_{\min} + |S(t_{\min})| + c_{\min} > 0$$

1531 from the positivity of  $c_{\min}$ . □  
 1532

1533 **Remark.** For numeric stability, we want each  $\gamma_i(t)$  to stay as constant as possible. In other words,  
 1534 the functions that satisfy the boundary conditions while minimizing change,  
 1535

$$1536 \int_0^1 \sum_{i=1}^n (\gamma_i(t))^2 dt$$

1537 are the functions we want. The best a simplest candidate solution is therefore the constant function,  
 1538  $\gamma_i(t) = \gamma_i(0) = \gamma_i(1)$ . Our solution guarantees  
 1539

$$1540 \int_0^1 \sum_{i=1}^n (\gamma_i(t))^2 dt \leq \left( \frac{|S_{\min}|}{c_{\min}} + 1 \right)$$

1541 **Theorem B.3** (Adaptive Exponents for Discretized Sampling). *Consider a discretization of  
 1542 the time interval  $0 = t_0 < \dots < t_M = t_{\text{end}} < 1$  and let  $\alpha_t^{(i)}, \gamma_i(t), S(t, \{\gamma_i\}_i)$  be defined  
 1543 as in Theorem B.2. Assume  $S(0, \{\gamma_i\}_i) > 0$ . Then there exist differentiable functions  $\tilde{\gamma}_i(t)$   
 1544 preserving boundary values such that the criterion sum*

$$1545 S(t, \{\tilde{\gamma}_i\}_i) = \sum_{i=1}^n \frac{\tilde{\gamma}_i(t)}{(\alpha_t^{(i)})^2}$$

1546 *is strictly positive for all  $t \in [0, t_{\text{end}}]$ .*

1547 *Proof.* Since  $t_{\text{end}} < 1$  and  $\alpha_t^{(i)} > 0$  on  $[0, 1]$ , the term  $1/(\alpha_t^{(i)})^2$  is bounded on the compact interval  
 1548  $[0, t_{\text{end}}]$ . If  $S(t, \{\gamma_i\}_i) \leq 0$  at some point, let  $t_{\min} \in (0, t_{\text{end}}]$  be the time minimizing  $S(t, \{\gamma_i\}_i)$   
 1549 and  $S_{\min}$  be the minimum value. Since  $S(0, \{\gamma_i\}_i) > 0$ , there exists  $\delta > 0$  such that  $S(t, \{\gamma_i\}_i)$   
 1550 is positive on  $[0, \delta]$ . We choose a smooth bump function  $b(t)$  such that  $b(0) = 0, b(1) = 0$ , and  
 1551  $b(t) > 0$  on  $[\delta, t_{\text{end}}]$ . Pick index  $j$ . Since  $\alpha_t^{(j)}$  is bounded and non-zero on  $[\delta, t_{\text{end}}]$ , the quantity  
 1552  $b(t)/(\alpha_t^{(j)})^2$  is bounded and non-negative. Let  $C_{\min} > 0$  be its minimum on  $[\delta, t_{\text{end}}]$ .  
 1553

We update  $\tilde{\gamma}_j(t) = \gamma_j(t) + B \cdot b(t)$ . For  $t < \delta$ , the sum is always positive. For  $t \in [\delta, t_{\text{end}}]$ , the new sum is

$$S(t, \{\tilde{\gamma}_i\}_i) = S(t, \{\gamma_i\}_i) + B \frac{b(t)}{(\alpha_t^{(j)})^2} \geq S_{\min} + B \cdot C_{\min}$$

By selecting  $B$  sufficiently large, we can force  $S(t, \{\tilde{\gamma}_i\}_i) > 0$  over the entire sampling interval while maintaining the fixed boundary values for the exponents.  $\square$

#### B.4 GAUSSIAN MIXTURE MODELS

We investigate integrability preservation for Gaussian Mixture Models (GMMs). Consider probability paths  $\{p_t\}_{t \in [0,1]}$  generated by stochastic interpolants (Definition B.1), where the initial distribution  $p_0$  is standard normal  $\mathcal{N}(0, I)$  and the final distribution  $p_1$  is a GMM.

**Definition B.2** (Gaussian Mixture Model). A **Gaussian Mixture Model (GMM)**  $p(x)$  in  $\mathbb{R}^d$  is a probability density of the form:

$$p(x) = \sum_{j=1}^J w_j \mathcal{N}(x; \mu_j, \Sigma_j) \quad (\text{B.8})$$

where weights  $w_j > 0$  sum to 1, and each covariance matrix  $\Sigma_j$  is positive definite.

**Product of GMMs.** Similar to the compactly supported target case, integrability at the boundaries does not automatically imply integrability at intermediate times. A counterexample is provided in the main text (Eq. 3 and Fig. 2), demonstrating that intermediate paths can diverge even when endpoints are valid.

To guarantee integrability for ratios of product-of-GMMs, we must enforce a stronger structural condition. We first derive precise exponential bounds.

**Lemma B.4** (Exponential Bounds for GMMs). Let  $q(x) = \sum_{j=1}^J c_j \mathcal{N}(x; \mu_j, \Sigma_j)$ . Define the extremal eigenvalues  $\lambda_{\max}(q) := \max_j \lambda_{\max}(\Sigma_j)$  and  $\lambda_{\min}(q) := \min_j \lambda_{\min}(\Sigma_j)$ . Then there exist finite constants  $K_{\pm}, L_{\pm} > 0$  such that for all  $x \in \mathbb{R}^d$ :

$$q(x) \leq K_+ \exp\left(-\frac{\|x\|^2}{2\lambda_{\max}(q)} + L_+ \|x\|\right), \quad (\text{B.9})$$

$$q(x) \geq K_- \exp\left(-\frac{\|x\|^2}{2\lambda_{\min}(q)} - L_- \|x\|\right). \quad (\text{B.10})$$

*Proof. Upper Bound:*  $q(x) \leq \sum_j \mathcal{N}(x; \mu_j, \Sigma_j)$ . For each component  $j$ , we bound the quadratic form in the exponent using Rayleigh quotients:

$$(x - \mu_j)^\top \Sigma_j^{-1} (x - \mu_j) \geq \lambda_{\max}(\Sigma_j)^{-1} \|x - \mu_j\|^2 \geq \frac{1}{\lambda_{\max}(q)} (\|x\|^2 - 2\|x\| \|\mu_j\|).$$

Substituting this into the Gaussian PDF, we define  $L_+ = \max_j \frac{\|\mu_j\|}{\lambda_{\max}(q)}$  and collect constants into  $K_+$ .

**Lower Bound:**  $q(x) \geq c_{j^*} \mathcal{N}(x; \mu_{j^*}, \Sigma_{j^*})$  for any index  $j^*$ . We upper bound the quadratic form:

$$(x - \mu_{j^*})^\top \Sigma_{j^*}^{-1} (x - \mu_{j^*}) \leq \lambda_{\min}(\Sigma_{j^*})^{-1} \|x - \mu_{j^*}\|^2 \leq \frac{1}{\lambda_{\min}(q)} (\|x\|^2 + 2\|x\| \|\mu_{j^*}\| + \|\mu_{j^*}\|^2).$$

Substituting this yields the form in eq. (B.10) with  $L_- = \frac{\|\mu_{j^*}\|}{\lambda_{\min}(q)}$ .  $\square$

We now state the sufficient and necessary conditions for integrability of heterogeneous products.

**Theorem B.4** (Integrability Preservation for Heterogeneous Products). *Let  $\{q_t^{(i)}\}$  be GMM probability paths generated by  $X_t^{(i)} = \alpha_t^{(i)} X_0^{(i)} + \beta_t^{(i)} X_1^{(i)}$  with  $X_0^{(i)} \sim \mathcal{N}(0, I)$ . Let  $\pi_i : \mathbb{R}^d \rightarrow \mathbb{R}^{d_i}$  be projections onto coordinate index sets  $I_i$ , and define the composite function  $g_t(x) := \prod_{i=1}^n (\tilde{q}_t^{(i)}(x))^{\gamma_i}$ , where  $\tilde{q}_t^{(i)} = q_t^{(i)} \circ \pi_i$ .*

*For each coordinate  $k \in \{1, \dots, d\}$  and time  $t \in [0, 1]$ , we define two stability coefficients. The **sufficiency criterion**  $C_k^{\text{suff}}(t)$  is defined as:*

$$C_k^{\text{suff}}(t) := \sum_{i:k \in I_i, \gamma_i > 0} \frac{\gamma_i}{\lambda_{\max}(q_t^{(i)})} + \sum_{i:k \in I_i, \gamma_i < 0} \frac{\gamma_i}{\lambda_{\min}(q_t^{(i)})}. \quad (\text{B.11})$$

*The **necessity criterion**  $C_k^{\text{nec}}(t)$  is defined as:*

$$C_k^{\text{nec}}(t) := \sum_{i:k \in I_i, \gamma_i > 0} \frac{\gamma_i}{\lambda_{\min}(q_t^{(i)})} + \sum_{i:k \in I_i, \gamma_i < 0} \frac{\gamma_i}{\lambda_{\max}(q_t^{(i)})}. \quad (\text{B.12})$$

*If  $g_1(x)$  is integrable, then:*

1. **(Sufficiency)** *If  $C_k^{\text{suff}}(t) > 0$  for all  $k$  and all  $t \in [0, 1]$ , then  $g_t(x)$  is integrable for all  $t \in [0, 1]$ .*
2. **(Necessity)** *Conversely, if there exists a coordinate  $k$  and time  $t$  such that  $C_k^{\text{nec}}(t) < 0$ , then  $g_t(x)$  is not integrable.*

*Proof. **Sufficiency** ( $C_k^{\text{suff}}(t) > 0$ ):* We construct an integrable upper bound for  $g_t(x)$ . To upper bound a product with positive and negative exponents, we require an *upper* bound for terms with  $\gamma_i > 0$  and a *lower* bound for terms with  $\gamma_i < 0$  (since negative exponents invert the inequality). Applying Lemma B.4:

$$\begin{aligned} g_t(x) &\leq \prod_{\gamma_i > 0} \left( K_{+,i} e^{-\frac{\|\pi_i(x)\|^2}{2\lambda_{\max}(q_t^{(i)})} + L_{+,i} \|\pi_i(x)\|} \right)^{\gamma_i} \prod_{\gamma_i < 0} \left( K_{-,i} e^{-\frac{\|\pi_i(x)\|^2}{2\lambda_{\min}(q_t^{(i)})} - L_{-,i} \|\pi_i(x)\|} \right)^{\gamma_i} \\ &= K \exp \left( -\frac{1}{2} \sum_{k=1}^d C_k^{\text{suff}}(t) x_k^2 + \sum_{i=1}^n \delta_i \|\pi_i(x)\| \right). \end{aligned}$$

The coefficient of the quadratic term  $x_k^2$  in the exponent corresponds exactly to  $C_k^{\text{suff}}(t)$  defined in Eq. B.11. The linear terms are bounded by  $D\|x\|$  for some finite  $D > 0$  (the constants  $\delta_i$  are also finite). Thus, the exponent behaves as  $-\frac{1}{2}x^\top \text{diag}(C^{\text{suff}}(t))x + O(\|x\|)$ . Since  $C_k^{\text{suff}}(t) > 0$  for all  $k$ , the quadratic decay dominates the linear growth, ensuring integrability on  $\mathbb{R}^d$ .

**Necessity** ( $C_k^{\text{nec}}(t) < 0$ ): We prove this by constructing a lower bound that diverges. To lower bound the product, we require a *lower* bound for terms with  $\gamma_i > 0$  and an *upper* bound for terms with  $\gamma_i < 0$ . Applying the reverse inequalities from Lemma B.4:

$$\begin{aligned} g_t(x) &\geq \prod_{\gamma_i > 0} \left( K_{-,i} e^{-\frac{\|\pi_i(x)\|^2}{2\lambda_{\min}(q_t^{(i)})} - L_{-,i} \|\pi_i(x)\|} \right)^{\gamma_i} \prod_{\gamma_i < 0} \left( K_{+,i} e^{-\frac{\|\pi_i(x)\|^2}{2\lambda_{\max}(q_t^{(i)})} + L_{+,i} \|\pi_i(x)\|} \right)^{\gamma_i} \\ &= \tilde{K} \exp \left( -\frac{1}{2} \sum_{k=1}^d C_k^{\text{nec}}(t) x_k^2 - \tilde{D}(x) \right) \end{aligned}$$

where the quadratic coefficient is exactly  $C_k^{\text{nec}}(t)$  defined in Eq. B.12, and  $\tilde{D}(x)$  captures linear terms. The exponent is quadratic with coefficient matrix  $A$ , a diagonal matrix whose entries are  $A_{jj} = C_k^{\text{nec}}(t)$ . Let  $k^*$  be a coordinate such that  $C_{k^*}^{\text{nec}}(t) < 0$ . Then  $A_{k^*k^*} < 0$ , so  $A$  is not positive definite ( $A \not\succ 0$ ), and by Lemma B.3 the integral over  $\mathbb{R}^d$  diverges.  $\square$

**Revisiting the counterexample in the main text.** We apply Theorem B.4 to analyze the pathological Gaussian path example presented in Eq. 3 and Figure 2 of the main text. Since the components

are single Gaussians (trivial GMMs with  $J = 1$ ), the spectral bounds collapse to the scalar variance:  $\lambda_{\max}(q_t^{(i)}) = \lambda_{\min}(q_t^{(i)}) = \sigma_i^2(t)$ . Consequently, the sufficiency and necessity criteria coincide:  $C_k^{\text{suff}}(t) = C_k^{\text{nec}}(t) =: C(t)$ . The dimension is  $d = 1$ . The exponents are  $\gamma_1 = 1, \gamma_2 = 1$  (numerator) and  $\gamma_3 = -1, \gamma_4 = -1$  (denominator). The variance paths are given by  $\sigma_i^2(t) = (1-t)^2\sigma_{i,0}^2 + t^2\sigma_{i,1}^2$ . We evaluate the criterion at the critical time  $t = 0.5$ :

$$\begin{aligned}\sigma_1^2(0.5) &= (0.5)^2(1) + (0.5)^2(0.5) = 0.375 & \sigma_2^2(0.5) &= (0.5)^2(1) + (0.5)^2(7) = 2.0 \\ \sigma_3^2(0.5) &= (0.5)^2(1.5) + (0.5)^2(1) = 0.625 & \sigma_4^2(0.5) &= 0.625 \quad (\text{identical to } q^{(3)})\end{aligned}$$

Substituting these into Eq. B.12,  $C(0.5) \approx -0.03 < 0$ . Since  $C(0.5) < 0$ , the necessity condition of Theorem B.4 implies that  $g_{0.5}(x)$  is **not integrable**. This theoretical prediction aligns perfectly with the empirical divergence and ‘‘Marginal Path Collapse’’ illustrated in Figure 2.

## C EXPERIMENTAL SETUP

For full reproducibility, we provide the exact analytical expressions for the noise schedules  $\alpha_t$  and  $\beta_t$  used in our experiments in Table C.1. The stochastic interpolant is defined as  $X_t = \alpha_t X_0 + \beta_t X_1$ .

Table C.1: Exact formulations of noise schedules used in experiments.

| Schedule Name          | Signal Scale $\alpha_t$              | Noise Scale $\beta_t$   |
|------------------------|--------------------------------------|-------------------------|
| $1 - t$                | $1 - t$                              | $t$                     |
| $1 - t^2$              | $1 - t^2$                            | $t$                     |
| $\cos(\frac{\pi}{2}t)$ | $\cos(\frac{\pi}{2}t)$               | $\sin(\frac{\pi}{2}t)$  |
| DDPM                   | $\exp(-\frac{1}{4}(19.9t^2 + 0.1t))$ | $\sqrt{1 - \alpha_t^2}$ |
| Sigmoid <sup>†</sup>   | $\sqrt{1 - \exp(-\eta(1 - t))}$      | $t$                     |
| Custom                 | $1 - 4t + 7t^2 - 4t^3$               | $t$                     |

**Custom:** This polynomial schedule was used specifically for the synthetic quantitative benchmark (Table 2) to test robustness against non-monotonic effective variances. **DDPM** corresponds to the variance preserving (VP) schedule with linear  $\beta$ -scheduling from  $\beta_{\min} = 0.1$  to  $\beta_{\max} = 20$  (scaled to  $t \in [0, 1]$ ). The expression is derived from  $\alpha_t = \sqrt{\exp(-\int_0^t \beta(s)ds)}$ . For **Sigmoid** we utilize a numerically stable formulation involving the softplus function. The term  $\eta(x)$  is defined as:

$$\eta(x) = \frac{20}{12} \text{softplus}(12(x - 0.5)) + 0.001x, \quad \text{where } \text{softplus}(z) = \log(1 + e^z).$$

### C.1 SYNTHETIC DATASET: 2D CHECKER

**Dataset.** We evaluate the fidelity of samples generated by ACE, NR, and FKC by computing distributional discrepancies against the ground truth, reporting Wasserstein distances ( $W_1, W_2$ ) and Maximum Mean Discrepancy with an RBF kernel (MMD). The ground truth 2D Checkerboard distribution on the domain  $\mathcal{D} = [-4, 4]^2$  is formally defined by the density:

$$p_{\text{Checker}}(x, y) = \frac{1}{32} \cdot \mathbf{1}\left(\left\lfloor \frac{x}{2} \right\rfloor + \left\lfloor \frac{y}{2} \right\rfloor \text{ is odd}\right) \cdot \mathbf{1}((x, y) \in \mathcal{D}), \quad (\text{C.1})$$

where  $\lfloor \cdot \rfloor$  denotes the floor function and  $\mathbf{1}(\cdot)$  is the indicator function. The support consists of alternating  $2 \times 2$  squares.

**Implementation.** For all experiments, we sampled 10,000 samples over 1,000 SDE steps with noise level  $\sigma_t = 0.5$ . For the 2D benchmark experiments, we chose to resample based on Effective Sample Size (ESS), a commonly used technique in sequential Monte Carlo (Naesseth et al., 2019). We used a threshold of 0.7 (Hyperparameter study in Figure. C.1). For both 1D and 2D experiments, we used a multilayer perceptron (MLP) with a time embedding module concatenated to the input. The main network consisted of four hidden layers of 256 units with SiLU activations. Depending on the task

Reviewer  
naNy

dimensionality, the input layer size was  $d + 256$  (where  $d = 1, 2$  for 1D/2D inputs, respectively) and the output dimension matched the data dimension. Models were trained with the interpolant loss (Albergo et al., 2023) using the Adam optimizer at learning rate  $2 \times 10^{-3}$ , for 2000 epochs on 1D tasks and 10,000 epochs on 2D tasks. We use (Hutchinson, 1989) to compute divergences.

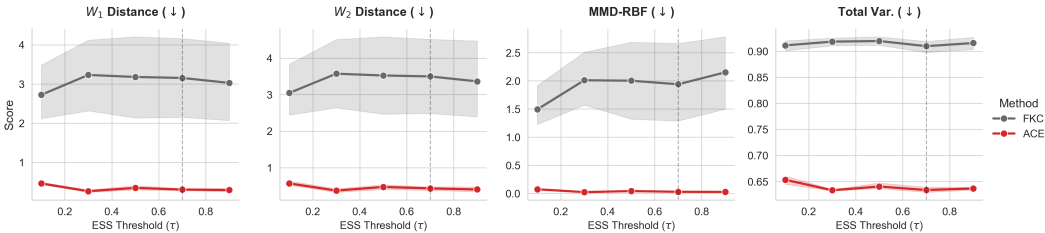

Figure C.1: **Performance comparison across varying ESS Thresholds.** Across multiple ESS thresholds,  $\tau \in \{0.1, 0.3, 0.5, 0.7, 0.9\}$ , ACE displays stable performance (with best values at  $\tau = 0.7$ ) across different hyperparameter settings, outperforming FKC by a large margin. FKC consistently performs worse, implying its performance degradation is due to path collapse and not due to suboptimal parameter tuning. We used the same evaluation setup as in our main experiments. Shaded regions denote variance across 5 seeds.

**Path collapse frequencies.** For annealed three-expert composition  $q_t^{(1)}(q_t^{(2)}/q_t^{(3)})^w$ , there are  $5^3 = 125$  total triplets, 120 heterogeneous triplets (excluding  $\alpha_t^{(1)} = \alpha_t^{(2)} = \alpha_t^{(3)}$ ), and 100 likelihood-nonhomogeneous ( $\alpha_t^{(2)} \neq \alpha_t^{(3)}$ ) triplets, the heterogeneous steering case. Among the 100 heterogeneous steering cases, path collapse frequencies are given in Table. E.5 with the full list of schedule compositions given in Figure. E.5.

**Visualization Details.** All sample/trajectory visualizations use seed 0. In criterion plots Figures 3 and E.5, we visualize the criterion  $C(t)$  to demonstrate the prevalence of path collapse. To maintain a consistent and readable scale across all 100 combinations, we fix the y-axis range to  $[-20, 100]$ . For the majority of schedules, we plot the full trajectory  $t \in [0, 1]$ . However, in some cases (e.g., high-guidance regimes  $w = 15$ ), the criterion may exhibit rapid asymptotic growth (exceeding 300) followed by a sharp singularity as  $t \rightarrow 1$ . In these cases, to prevent visual clutter, we cease plotting the line segment once it exits the visible y-axis frame. This visualization strategy focuses on the relevant operational range for discretized sampling ( $t \leq t_{\text{end}}$ , Theorem B.3), where the sign of  $C(t)$  determines numerical stability.

## C.2 FLEXIBLE-POSE SCAFFOLD DECORATION

**Dataset.** We evaluate on a subset of CrossDocked2020 (Francoeur et al., 2020). To stress the benefit of flexible scaffold decoration, we select 9 ligand–pocket pairs (CrossDock-Weak) with weak binding (Vina score  $> -5$  kcal/mol). To test generalization, we build an auxiliary dataset (CrossDock-SBDD) by sampling ligands from DiffSBDD and extracting scaffolds as a ring plus atoms within two bonds. The task is to generate ligands that (i) preserve the scaffold topology and (ii) achieve favorable binding to the pocket.

**Our Implementation** As described in Sec. 2.5, we combine pretrained density models: GeoDiff (Xu et al., 2022), DiffSBDD (Schneuing et al., 2024), and EDM (Hoogetboom et al., 2022b) as the conformer generation model, structure-based drug design model, and de novo generation model, respectively, enabling generation that preserves scaffold topology while allowing scaffold poses to adapt within the pocket. Unless stated otherwise, we use 500 denoising steps with resampling every 10 steps. For weighting the ratio-of-density, we use the weight values 1.1, 1.2, 1.3, and 1.4. For each pocket–scaffold pair, we sample five candidates per seed, repeat over two seeds, and report mean. We run our experiment on Python 3.8.9 and NVIDIA-A100 GPUs. We also note that we run ACE with batch size 10 and it takes 2 GB GPU VRAM.

**Baselines** We compare ACE with the FKC and NR methodologies in flexible scaffold decoration by constructing FKC, which applies FKC to the target density (Section 2.5) while sharing the

1782 same pretrained topology-conditioned, unconditional, and pocket-conditioned models. NR is imple-  
1783 mented as FKC without resampling. To further illustrate the benefit of flexibility, we adapt strong  
1784 pocket-aware generative models to a fixed-pose regime by clamping scaffold atom coordinates to the  
1785 reference pose and permitting generation only for non-scaffold atoms: Delete (Chen et al., 2025),  
1786 DiffDec (Xie et al., 2024), and AutoFragDiff (Ghorbani et al., 2024).

1787  
1788 **Metrics.** For comparison between ACE and baseline diffusion steering methods NR, FKC, we  
1789 evaluate the sampling path using three metrics. (i) Validity measures whether generated molecules  
1790 are chemically consistent without fragmentation or the docking process of QVina2 (Alhossary et al.,  
1791 2015) success. (ii) Docking Score, computed with QVina2 (Alhossary et al., 2015), assesses pocket  
1792 compatibility. For each protein pocket, we report the Mean, Median, Best, Top-3, and Worst scores,  
1793 as well as the Optimization Success Rate (OSR), defined as the proportion of generated molecules  
1794 with docking scores better than the reference ligand. We further compare our flexible scaffold dec-  
1795 oration pipeline against fixed-scaffold decoration baselines with the same metrics.

## 1797 D BACKGROUND AND RELATED WORK

1798  
1799 Our work sits at the intersection of three key areas: inference-time control for generative models,  
1800 the theory of path sampling correctors, and the practical challenge of composing pretrained models  
1801 for scientific discovery. We situate our contributions in relation to each (Table 1).

1802 **Inference-Time Control and Guidance.** A major advantage of diffusion models is their steerability  
1803 at inference time. Classifier-free guidance (CFG) is a widely used heuristic that mixes conditional  
1804 and unconditional scores to enhance sample fidelity (Ho & Salimans, 2021; Chung et al., 2025).  
1805 More recent work has proposed training-free or post hoc steering frameworks, including universal  
1806 training-free guidance (Ye et al., 2024; Bansal et al., 2024), scalable steering pipelines (Singhal et al.,  
1807 2025), and energy- or self-guided sampling approaches (Epstein et al., 2023; Yu et al., 2023; Song  
1808 et al., 2023). These methods often adopt ratio-of-densities formulations (e.g.,  $p(x|c)^w/p(x)^{w-1}$ ),  
1809 a powerful primitive that also underlies contrastive decoding in language models (Li et al., 2023a)  
1810 and controlled generation in discrete diffusion models (Schiff et al., 2025; Hasan et al., 2025). While  
1811 practically effective, these approaches focus on how to steer (e.g., by mixing scores) but provide no  
1812 guarantees that the resulting sampling path remains valid when models are combined multiplicatively.  
1813 Our work is the first to formalize and solve this underlying path-existence problem.

1814 **Theoretical Foundations and Path Sampling Correctors.** The steering of stochastic processes  
1815 has been studied using the Feynman–Kac (FK) formula (Stoltz et al., 2010), which connects path-  
1816 wise sampling weights to principled unbiased estimators. This provides the basis for modern cor-  
1817 rector methods in diffusion models (Skreta et al., 2025a;b; Mark et al., 2025; Hasan et al., 2025).  
1818 Feynman–Kac Correctors (FKC) can in principle yield unbiased samples, but their guarantees re-  
1819 quire restrictive assumptions: (i) homogeneity of models with compatible noise schedules and di-  
1820 mensions, and (ii) constant exponents in the ratio-of-densities. These assumptions exclude important  
1821 real-world cases, such as heterogeneous pretrained models or time-dependent negative exponents for  
1822 denominator annealing. When violated, the FK framework provides no guidance, and *Marginal Path*  
1823 *Collapse* occurs. Our work extends the FK formulation by introducing a path-existence criterion for  
1824 heterogeneous products and incorporating time-varying exponents into an FK-style partial differen-  
1825 tial equation, enabling robust correction beyond prior limits.

1826 **Composing Pretrained Models for Scientific Discovery.** The ability to combine specialized pre-  
1827 trained models is central in domains like structure-based drug design (SBDD). A researcher may  
1828 wish to compose a protein-pocket conditioned ligand generator (Guan et al., 2023; Schneuing et al.,  
1829 2024), a molecule conformer generator (Xu et al., 2022), and a denovo generation model (Hooge-  
1830 boom et al., 2022b) into a single product distribution. Similar needs arise in scaffold decoration and  
1831 fragment-based pipelines (Tan et al., 2022; Hu et al., 2023; Liu et al., 2025). However, naive mul-  
1832 tiplicative composition can trigger path collapse, making the generative process invalid. Our ACE  
1833 framework directly enables robust multi-expert composition by guaranteeing path existence and pro-  
1834 viding adaptive exponent scheduling. This transforms composition from an unreliable heuristic into  
1835 a principled, verifiable procedure. Applications to SBDD and scaffold decoration are especially  
compelling, as contemporary diffusion methods (Peng et al., 2022; Gao et al., 2024; Huang et al.,  
2024d;c) often assume fixed poses or homogeneous conditions—assumptions ACE can relax.

## D.1 COMMON STEERING OBJECTIVES AS RATIO-OF-DENSITIES PATHS.

Reviewer  
gBQy,  
naNy

Many standard inference-time control techniques can be unified under the ratio-of-densities framework, where the target density takes the form  $p^*(x) \propto \prod_i q^{(i)}(x)^{\gamma_i}$ . Along the generative trajectory, this induces a time-indexed family  $p_t^*(x) \propto \prod_i q_t^{(i)}(x)^{\gamma_i}$ , whose intermediate densities must remain normalizable for valid sampling. **Marginal Path Collapse** is the violation of this assumption.

**Classifier-free guidance (CFG):** To enhance samples consistent with condition  $y$ , CFG reweights the conditional model relative to the unconditional one,  $p^*(x) \propto p_\theta(x | y)^\gamma p_\theta(x)^{1-\gamma}$ , implying the path  $p_t^*(x) \propto q_t(x | y)^\gamma q_t(x)^{1-\gamma}$  with score  $\gamma \nabla \log q_t(x | y) + (1 - \gamma) \nabla \log q_t(x)$ .

**Product-of-experts:** To enforce multiple constraints  $c_1, \dots, c_K$ , one multiplies separate experts  $q^{(k)}(x) = p_\theta(x | c_k)$ , yielding  $p^*(x) \propto \prod_{k=1}^K q^{(k)}(x)$  and the path  $p_t^*(x) \propto \prod_{k=1}^K q_t^{(k)}(x)$ .

**Reward-tilted / RL-style guidance:** Combining a base model  $p_\theta(x)$  with a reward  $r(x)$  creates a target  $p^*(x) \propto p_\theta(x) \exp(\beta r(x))$ . This can be viewed as a product of base density  $q_{\text{base}}(x)$  with a reward-density  $q_{\text{rew}}(x) \propto \exp(\beta r(x))$ , leading to the path  $p_t^*(x) \propto q_t^{\text{base}}(x) q_t^{\text{rew}}(x)$ .

**Contrastive / reference model decoding:** To suppress generic patterns from a reference model  $p_{\text{ref}}$ , the target is defined as  $p^*(x) \propto p_{\text{LM}}(x)^\gamma p_{\text{ref}}(x)^{-\gamma}$ , inducing the path  $p_t^*(x) \propto q_t^{\text{LM}}(x)^\gamma q_t^{\text{ref}}(x)^{-\gamma}$ .

**Bayesian composition:** When only conditionals  $p_\theta(x | c_k)$  are available, Bayes yields

$$p(x | c_{1:K}) \propto p(x) \prod_k p(c_k | x) \propto p(x) \prod_{\text{prior } k} p_\theta(x | c_k) / \prod_{\text{marginal}} p_\theta(x)$$

The assumptions and derivation under the heterogeneous conditioning structure is given in Eq. 11. This induces the path  $p_t^*(x) \propto q_t^{\text{prior}}(x) \prod_k q_t^{(k)}(x) q_t^{\text{marg}}(x)^{-1}$  which fits our general ratio-of-densities template.

**Scientific applications.** Our molecular DN/CONF/SBDD compositions for scaffold decoration, protein glue generation, fragment linking are the examples of Bayesian composition; the full derivations are given in Section E.1.

## E ADDITIONAL ANALYSES: HETEROGENEOUS COMPOSITION AND PATH COLLAPSE

### E.1 HETEROGENEOUS CONDITIONING STRUCTURES IN SCIENTIFIC TASKS

Reviewer  
gBQy,  
naNy

**Definition E.1** (Heterogeneous Conditioning Structure). We define a heterogeneous conditioning structure as a property of the **target distribution**  $p(X, Y | A, B)$  where conditioning variables exert partial or differing constraints on the system components. For instance, condition  $A$  may constrain only the subset  $X$ , while condition  $B$  constrains the joint system  $(X, Y)$ . This structure is distinct from global conditioning (where a condition affects all variables uniformly) and is pervasive in scientific modeling (see Figure E.2).

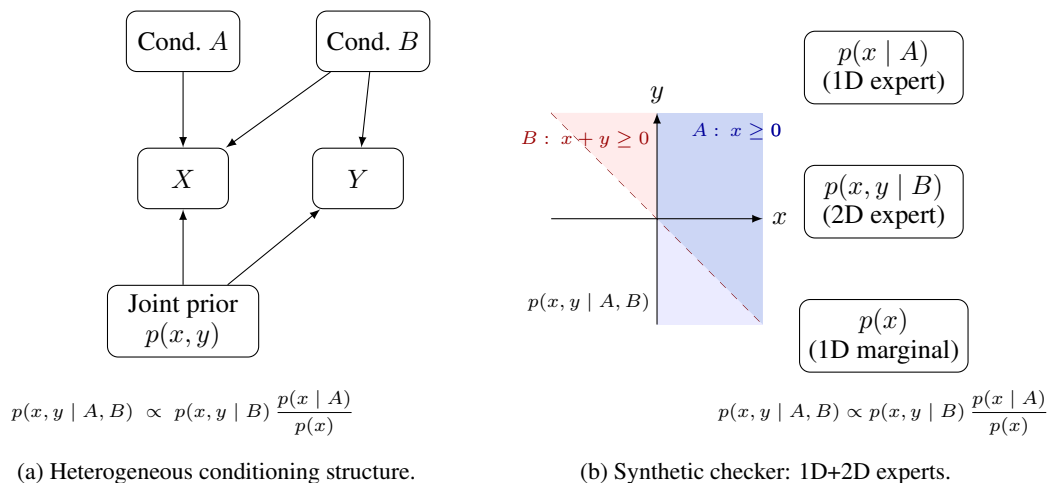

Figure E.2: **Illustration of heterogeneous conditioning structure and its decomposition.** (a) Heterogeneous conditioning structure: condition  $A$  acts only on  $X$ , condition  $B$  acts on  $(X, Y)$ , leading to the Bayes factorization  $p(x, y | A, B) \propto p(x | A) p(x, y | B) / p(x)$ . (b) Synthetic checker:  $A = \{x \geq 0\}$  constrains only the  $x$ -axis, while  $B = \{x + y \geq 0\}$  constrains the joint plane, motivating a heterogeneous composition of two 1D experts and one 2D expert.

**Decomposition and Diffusion Steering.** Crucially, these heterogeneous target structures can be decomposed via Bayes’ rule (Eq. 11) into products of simpler marginal or conditional distributions. This decomposition is powerful because it allows complex targets to be modeled by composing separate pretrained experts. We visualize this abstractly in Figure E.2a, which highlights how the joint prior governs the fusion of heterogeneous signals. For a concrete example, consider the constrained distribution  $p(x, y | x \geq 0, x + y \geq 0)$  in Figure E.2b. It decomposes into

$$p(x, y | A, B) \propto p(x, y | B) \frac{p(x | A)}{p(x)}$$

allowing a heterogeneous task to be solved by combining a joint expert  $p(x, y | B)$  with a marginal expert  $p(x | A)$ . While this compositional approach aligns with the principles of diffusion steering (e.g., FKC (Skreta et al., 2025a)), previous frameworks overlook the implications of mixing experts with differing domains and schedules, a “blind spot” that leads to the instabilities discussed in Appendix E.2.

**Prevalence in Molecular Generation.** Heterogeneous conditioning is the norm in molecular discovery. Figures E.3a and E.3b illustrate three critical tasks—**scaffold decoration** (Chen et al., 2025; Ghorbani et al., 2024; Xie et al., 2024), **protein-gluce generation** (Kawasaki et al., 2023; Slabicki et al., 2020), and **fragment linking** (Sunseri & Koes, 2020; Igashov et al., 2024)—that fundamentally rely on this structure. In Examples E.1–E.3, we demonstrate that each of these tasks decomposes into a combination of three generative primitives: **de novo generation (DN)** (Hoogboom et al., 2022a), **conformer generation (CONF)** (Xu et al., 2022), and **structure-based drug design**

(SBDD) (Schneuing et al., 2024). Consequently, solving these high-value problems requires the ability to faithfully compose these specific model families.

**Common Notation and Primitives.** In the following examples, we represent a molecule with  $N$  atoms as a 3D point cloud  $\mathcal{M}$  with bond topology  $\mathcal{T}$ . We denote the target protein pocket by  $\mathcal{P}$  ( $\cdot, \text{pdb}$ ). The condition of **stable binding** is denoted as  $\mathcal{M} \leftrightarrow \mathcal{P}$  (satisfied when docking energy  $U^{\text{Dock}} < \tau^{\text{Dock}}$ ). We utilize three fundamental pretrained model families:

- **DN:** Unconditional *De Novo* generation ( $p(\mathcal{M})$ ).
- **CONF:** Topology-conditioned *Conformer* generation ( $p(\mathcal{M} | \mathcal{T})$ ).
- **SBDD:** Pocket-conditioned *Structure-Based Drug Design* ( $p(\mathcal{M} | \mathcal{P})$ ).

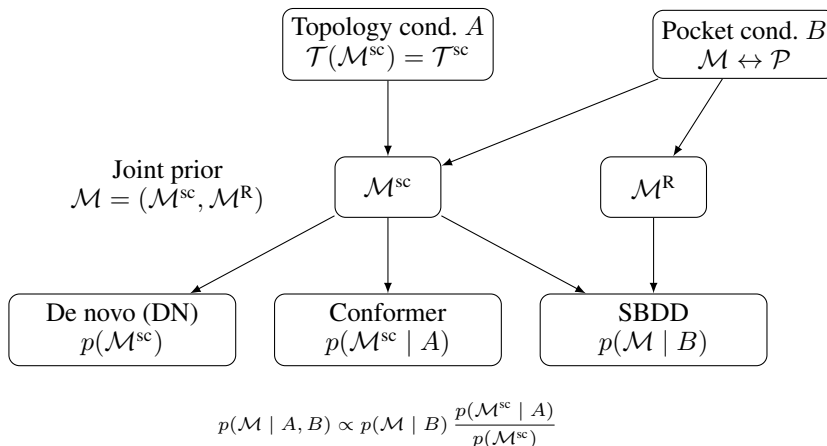

(a) Scaffold decoration: DN/CONF/SBDD composition.

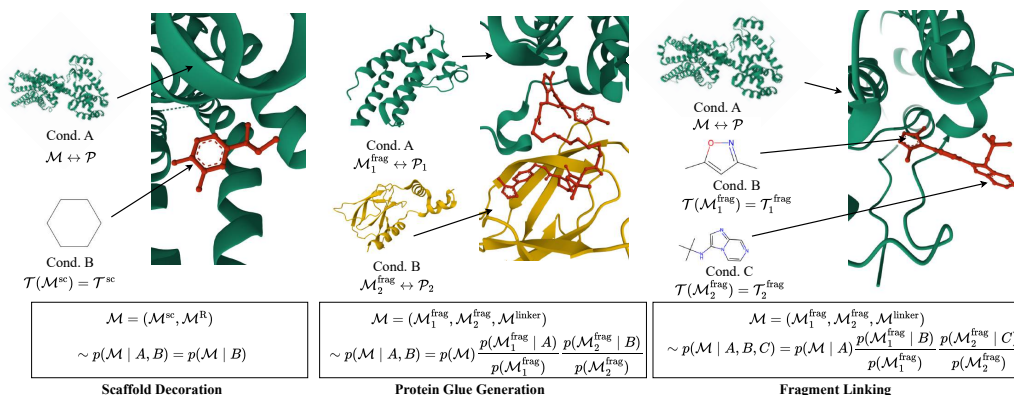

(b) Examples in molecular generation: Scaffold Decoration, Protein Glue Generation, Fragment Linking

**Figure E.3: Formulation of heterogeneous condition generation and its dominance in molecular generative tasks.** (a) Flexible-pose scaffold decoration mirrors the same structure: topology acts only on the scaffold coordinates, pocket binding acts on the full ligand, and the de-novo model provides the marginal over scaffolds; together they form a DN/CONF/SBDD ratio-of-densities target. (b) Illustration of three molecular generative tasks formulated under the heterogeneous-conditioning framework: scaffold decoration, protein-glue generation, and fragment linking. Each panel specifies the corresponding conditions, target distribution, and the decomposition into expert models for DN, CONF, and SBDD.

**Example E.1** (Scaffold Decoration). Scaffold decoration (Guan et al., 2009) is a pivotal strategy in lead optimization, enabling the refinement of physicochemical properties and potency while preserving the biological activity of a validated core structure. The goal is to generate

1998  
1999  
2000  
2001  
2002  
2003  
2004  
2005  
2006  
2007  
2008  
2009  
2010  
2011  
2012  
2013  
2014  
2015  
2016  
2017  
2018  
2019  
2020  
2021  
2022  
2023  
2024  
2025  
2026  
2027  
2028  
2029  
2030  
2031  
2032  
2033  
2034  
2035  
2036  
2037  
2038  
2039  
2040  
2041  
2042  
2043  
2044  
2045  
2046  
2047  
2048  
2049  
2050  
2051

an R-group side chain  $\mathcal{M}^R$  optimized for binding to a pocket  $\mathcal{P}$ , while preserving a conserved scaffold backbone  $\mathcal{M}^{\text{sc}}$  with fixed topology  $\mathcal{T}^{\text{sc}}$  (SMILES).

**Formulation.** The task is to sample a molecule  $\mathcal{M} = (\mathcal{M}^{\text{sc}}, \mathcal{M}^R)$  from:

$$(\mathcal{M}^{\text{sc}}, \mathcal{M}^R) \sim p(\mathcal{M}^{\text{sc}}, \mathcal{M}^R \mid \mathcal{T}(\mathcal{M}^{\text{sc}}) = \mathcal{T}^{\text{sc}}, (\mathcal{M}^{\text{sc}}, \mathcal{M}^R) \leftrightarrow \mathcal{P}). \quad (\text{E.1})$$

This exhibits the heterogeneous conditioning structure  $p(X, Y \mid A, B)$  where  $X = \mathcal{M}^{\text{sc}}$  (constrained by topology  $A$ ) and  $Y = \mathcal{M}^R$  (where the joint system is constrained by binding  $B$ ).

**Decomposition.** Applying Bayes’ rule, we decompose the target into a ratio of experts:

$$p^*(\mathcal{M}^{\text{sc}}, \mathcal{M}^R) \propto \frac{p(\mathcal{M}^{\text{sc}} \mid \mathcal{T}(\mathcal{M}^{\text{sc}}) = \mathcal{T}^{\text{sc}}) p(\mathcal{M} \mid \mathcal{M} \leftrightarrow \mathcal{P})}{p(\mathcal{M}^{\text{sc}})}. \quad (\text{E.2})$$

ACE allows us to sample from this using off-the-shelf experts:

$$p(\mathcal{M}^{\text{sc}} \mid \mathcal{T}^{\text{sc}}) \rightarrow \text{CONF} \quad (\text{Fixes scaffold geometry}) \quad (\text{E.3})$$

$$p(\mathcal{M}^{\text{sc}}) \rightarrow \text{DN} \quad (\text{Prior correction}) \quad (\text{E.4})$$

$$p(\mathcal{M} \mid \mathcal{P}) \rightarrow \text{SBDD} \quad (\text{Optimizes binding}) \quad (\text{E.5})$$

**Example E.2 (Protein Glue Generation).** Protein glues (Mogaki et al., 2019) represent a transformative therapeutic class capable of targeting “undruggable” proteins by inducing novel interactions, such as ubiquitin-mediated degradation. This task requires designing a linker  $\mathcal{M}^{\text{linker}}$  that connects two molecular fragments  $\mathcal{M}_1^{\text{frag}}, \mathcal{M}_2^{\text{frag}}$  such that they simultaneously bind to two distinct protein surfaces  $\mathcal{P}_1, \mathcal{P}_2$ .

**Formulation.** The full molecule  $\mathcal{M} = (\mathcal{M}_1^{\text{frag}}, \mathcal{M}_2^{\text{frag}}, \mathcal{M}^{\text{linker}})$  is sampled from:

$$\mathcal{M} \sim p(\mathcal{M} \mid \mathcal{M}_1^{\text{frag}} \leftrightarrow \mathcal{P}_1, \mathcal{M}_2^{\text{frag}} \leftrightarrow \mathcal{P}_2). \quad (\text{E.6})$$

This corresponds to  $p(X, Y \mid A, B)$  where  $A$  constrains fragment 1 and  $B$  constrains fragment 2.

**Decomposition.** We decompose the posterior to isolate the binding constraints:

$$p^*(\mathcal{M}) \propto \frac{p(\mathcal{M}_1^{\text{frag}} \mid \mathcal{P}_1) p(\mathcal{M}_2^{\text{frag}} \mid \mathcal{P}_2) p(\mathcal{M})}{p(\mathcal{M}_1^{\text{frag}}) p(\mathcal{M}_2^{\text{frag}})}. \quad (\text{E.7})$$

This task effectively composes two local binding models with a global prior:

$$p(\mathcal{M}_i^{\text{frag}} \mid \mathcal{P}_i) \rightarrow \text{SBDD} \quad (\text{Fragment-specific binding}) \quad (\text{E.8})$$

$$p(\mathcal{M}_i^{\text{frag}}), p(\mathcal{M}) \rightarrow \text{DN} \quad (\text{Global \& Marginal priors}) \quad (\text{E.9})$$

**Example E.3 (Fragment Linking).** Fragment linking (Bedwell et al., 2022) is the cornerstone of fragment-based drug discovery (FBDD), enabling the construction of high-affinity ligands by chemically bridging low-affinity fragments bound to adjacent sub-pockets. The goal is to assemble a ligand by connecting two pre-determined fragments  $\mathcal{M}_1^{\text{frag}}, \mathcal{M}_2^{\text{frag}}$  (with fixed chemical topologies  $\mathcal{T}_1, \mathcal{T}_2$ ) via a generated linker  $\mathcal{M}^{\text{linker}}$ , ensuring the final structure binds to a target pocket  $\mathcal{P}$ .

**Formulation.** The molecule  $\mathcal{M}$  is sampled from:

$$\mathcal{M} \sim p(\mathcal{M} \mid \mathcal{T}(\mathcal{M}_1^{\text{frag}}) = \mathcal{T}_1, \mathcal{T}(\mathcal{M}_2^{\text{frag}}) = \mathcal{T}_2, \mathcal{M} \leftrightarrow \mathcal{P}). \quad (\text{E.10})$$

2052  
2053  
2054  
2055  
2056  
2057  
2058  
2059  
2060  
2061  
2062  
2063  
2064  
2065  
2066  
2067  
2068  
2069  
2070  
2071  
2072  
2073  
2074  
2075  
2076  
2077  
2078  
2079  
2080  
2081  
2082  
2083  
2084  
2085  
2086  
2087  
2088  
2089  
2090  
2091  
2092  
2093  
2094  
2095  
2096  
2097  
2098  
2099  
2100  
2101  
2102  
2103  
2104  
2105

This represents a complex conditioning structure  $p(X, Y | A, B, C)$  where  $A, B$  enforce local topology and  $C$  enforces global binding.

**Decomposition.** The target density factorizes as:

$$p^*(\mathcal{M}) \propto \frac{p(\mathcal{M}_1^{\text{frag}} | \mathcal{T}_1) p(\mathcal{M}_2^{\text{frag}} | \mathcal{T}_2) p(\mathcal{M} | \mathcal{P})}{p(\mathcal{M}_1^{\text{frag}}) p(\mathcal{M}_2^{\text{frag}})}. \quad (\text{E.11})$$

ACE constructs this path by coordinating three distinct model families:

$$p(\mathcal{M}_i^{\text{frag}} | \mathcal{T}_i) \rightarrow \text{CONF} \quad (\text{Fragment topology}) \quad (\text{E.12})$$

$$p(\mathcal{M}_i^{\text{frag}}) \rightarrow \text{DN} \quad (\text{Marginal correction}) \quad (\text{E.13})$$

$$p(\mathcal{M} | \mathcal{P}) \rightarrow \text{SBDD} \quad (\text{Global binding}) \quad (\text{E.14})$$

**From Heterogeneous Targets to Heterogeneous Paths.** While the heterogeneous *conditioning structure* dictates which expert models must be combined to define the target at  $t = 1$ , the resulting *probability path* for  $t \in (0, 1)$  depends on the noise schedulers of those experts. This creates a systemic challenge: different model families (DN, CONF, SBDD) are historically trained with different noise schedules. We conducted a comprehensive survey of existing diffusion and flow-based models across these domains (summarized in Tables E.2, E.3, and E.4). The results show a lack of standardization, with the literature employing a fragmented mix of sigmoid, polynomial, and cosine schedules. Therefore, constructing generative paths for heterogeneous scientific tasks *inevitably* leads to heterogeneous schedules, where the mismatch in noise contraction rates induces path collapse. This confirms that the collapse phenomenon is not an edge case, but an inherent obstacle arising from the modular nature of scientific generative modeling. We provide a detailed quantitative analysis of this phenomenon, demonstrating its systematic prevalence across standard model combinations and its detrimental impact on sampling, in Appendix E.2.

**The Infeasibility of Homogeneous Composition.** Since Tables E.2–E.4 show that several schedulers appear across tasks, one might wonder whether composing models under a *shared* (homogeneous) scheduler could avoid path collapse. We clarify that using a common schedule across experts is generally infeasible in molecular generation due to two fundamental constraints.

**1. Heterogeneity in Representations.** Unlike images, molecules admit multiple incompatible representations. Some models encode atom types as continuous one-hot vectors  $H^{\text{one-hot}} \in \mathbb{R}^N$  evolving under Gaussian convolution; others use categorical variables with discrete states (Dunn & Koes, 2025; Lin et al., 2023) or operate in latent spaces (Ketata et al., 2024; Oestreich et al., 2024). Because these spaces differ in dimensionality, continuity, and semantic meaning, they cannot be embedded into a unified ambient space where a single diffusion path is consistently defined. This fundamentally constrains which experts can be mathematically composed.

**2. The “Empty Intersection” of Schedules.** Even if we restrict our scope to models with compatible continuous representations, a homogeneous triplet often does not exist. In our scaffold decoration experiment, all applicable DN models (EDM, GCDM) employ **quadratic** schedulers, while SBDD models (DiffSBDD, DualDiff) use either quadratic or sigmoid schedules. However, state-of-the-art CONF models not use the quadratic schedulers but mostly adopt the **sigmoid** schedules. Consequently, it is impossible to construct a homogeneous DN/CONF/SBDD triplet. This structural mismatch necessitates the use of heterogeneous schedules (quadratic for DN/SBDD, sigmoid for CONF), making the path-existence guarantees of ACE a prerequisite for reliable generation.

2106  
2107  
2108  
2109  
2110

Table E.2: **(CONF)** Diffusion and flow-based models for molecular conformer generation.  $N$  denotes the number of atoms.

| Model / Paper                                  | Scheduler                                                                                                                                                                                                  | Main Datasets        | Domain            |
|------------------------------------------------|------------------------------------------------------------------------------------------------------------------------------------------------------------------------------------------------------------|----------------------|-------------------|
| <b>GeoDiff</b> (Xu et al., 2022)               | $\alpha_t = \exp\left(-\frac{5}{6}[\log(1 + e^{12(t-\frac{1}{2})}) - \log(1 + e^{-6})]\right)$<br>$\beta_t = \sqrt{1 - \exp\left(-\frac{5}{3}[\log(1 + e^{12(t-\frac{1}{2})}) - \log(1 + e^{-6})]\right)}$ | GEOM-QM9, GEOM-Drugs | $\mathbb{R}^{3N}$ |
| <b>TorsionDiff</b> (Jing et al., 2022)         | $\alpha_t = \left(\frac{\pi}{100}\right)^t \pi^{1-t}$<br>$\beta_t = 1$                                                                                                                                     | GEOM-Drugs           | $SO(2)^M$         |
| <b>EC-Conf</b> (Fan et al., 2023)              | $\alpha_t = T(1-t)$<br>$\beta_t = 1$                                                                                                                                                                       | GEOM-QM9, GEOM-Drugs | $\mathbb{R}^{3N}$ |
| <b>GADIFF</b> (Wang et al., 2024a)             | $\alpha_t = \exp\left(-\frac{5}{6}[\log(1 + e^{12(t-\frac{1}{2})}) - \log(1 + e^{-6})]\right)$<br>$\beta_t = \sqrt{1 - \exp\left(-\frac{5}{3}[\log(1 + e^{12(t-\frac{1}{2})}) - \log(1 + e^{-6})]\right)}$ | GEOM-QM9, GEOM-Drugs | $\mathbb{R}^{3N}$ |
| <b>ET-Flow</b> (Hassan et al., 2024)           | $\alpha_t = 1-t$<br>$\beta_t = t$                                                                                                                                                                          | GEOM-QM9, GEOM-Drugs | $\mathbb{R}^{3N}$ |
| <b>AGDIFF</b> (Vieira Wyzykowski et al., 2025) | $\alpha_t = \exp\left(-\frac{5}{6}[\log(1 + e^{12(t-\frac{1}{2})}) - \log(1 + e^{-6})]\right)$<br>$\beta_t = \sqrt{1 - \exp\left(-\frac{5}{3}[\log(1 + e^{12(t-\frac{1}{2})}) - \log(1 + e^{-6})]\right)}$ | GEOM-QM9, GEOM-Drugs | $\mathbb{R}^{3N}$ |
| <b>LoQI</b> (Nikitin et al., 2025)             | $\alpha_t = \cos\left(\frac{\pi}{2}t\right)$<br>$\beta_t = \sin\left(\frac{\pi}{2}t\right)$                                                                                                                | ChEMBL3D             | $\mathbb{R}^{3N}$ |
| <b>CoFM</b> (Xu et al., 2025)                  | $\alpha_t = 1-t$<br>$\beta_t = t$                                                                                                                                                                          | GEOM-QM9             | $\mathbb{R}^{3N}$ |

2130  
2131  
2132  
2133  
2134  
2135

Table E.3: **(DN)** Diffusion and flow-based models for de novo molecular generation across coordinate-space, latent-space, and mixed graph-geometry domains.  $N$  denotes the number of atoms and  $A, B, C$  the number of atom types, bond types, and formal charge types.  $\mathcal{A} = [A], \mathcal{B} = [B]$ , and  $\mathcal{C}$  are the categorical spaces of  $A$  atom types,  $B$  bond types, and  $C$  formal charge types.

| Model / Paper                            | Scheduler                                                                                                                               | Main Datasets        | Domain                                                                                            |
|------------------------------------------|-----------------------------------------------------------------------------------------------------------------------------------------|----------------------|---------------------------------------------------------------------------------------------------|
| <b>EDM</b> (Hoogeboom et al., 2022a)     | $\alpha_t = \sqrt{1 - (1 - (t-1)^2)^2}$<br>$\beta_t = 1 - (t-1)^2$                                                                      | GEOM-QM9, GEOM-Drugs | $\mathbb{R}^{3N+A^N}$                                                                             |
| <b>MiDi</b> (Vignac et al., 2023)        | $\alpha_t = \cos\left(\frac{\pi}{2}t\right)$<br>$\beta_t = \sin\left(\frac{\pi}{2}t\right)$                                             | QM9, GEOM-Drugs      | $\mathbb{R}^{3N} \times \mathcal{A}^N \times \mathcal{B}^{\frac{N(N-1)}{2}}$                      |
| <b>GCDM</b> (Morehead & Cheng, 2023)     | $\alpha_t = \sqrt{1 - (1 - (t-1)^2)^2}$<br>$\beta_t = 1 - (t-1)^2$                                                                      | GEOM-QM9, GEOM-Drugs | $\mathbb{R}^{3N+A^N}$                                                                             |
| <b>EDM-SyCo</b> (Ketata et al., 2024)    | $\alpha_t = \sqrt{1 - (1 - (t-1)^2)^2}$<br>$\beta_t = 1 - (t-1)^2$                                                                      | ZINC250K, GuacaMol   | Latent Euclidean Space                                                                            |
| <b>DrugDiff</b> (Oestreich et al., 2024) | $\alpha_t = \sqrt{1 - (1 - (t-1)^2)^2}$<br>$\beta_t = 1 - (t-1)^2$                                                                      | ChEMBL, GuacaMol     | Latent Euclidean Space                                                                            |
| <b>VEDA</b> (Zhang et al., 2025)         | $\alpha_t = T_{\min} \left( \frac{T_{\max}}{T_{\min}} \right)^{(1-\rho)(1-t) + \rho \frac{2}{\pi} \arcsin \sqrt{1-t}}$<br>$\beta_t = 1$ | GEOM-QM9, GEOM-Drugs | $\mathbb{R}^{3N} \times \mathcal{A}^N$                                                            |
| <b>FlowMol3</b> (Dunn & Koes, 2025)      | $\alpha_t = 1-t$<br>$\beta_t = t$                                                                                                       | GEOM-Drugs           | $\mathbb{R}^{3N} \times \mathcal{A}^N \times \mathcal{B}^{\frac{N(N-1)}{2}} \times \mathcal{C}^N$ |

2157  
2158  
2159

Table E.4: **(SBDD)** Pocket-conditioned (structure-based drug design) diffusion and flow-based models, including sigmoid, cosine, and quadratic noise schedules across 3D and mixed 3D–categorical domains.  $N$  denotes the number of atoms and  $A$  the number of atom types.  $\mathcal{A} = [A]$  is the categorical space of  $A$  atom types. For D3FG,  $N_{\text{fg}}$  and  $N_{\text{at}}$  denote the numbers of functional-group atoms and remaining atoms, respectively, and  $\mathcal{A}_{\text{fg}}$  and  $\mathcal{A}_{\text{at}}$  denote the categorical spaces for functional-group types and atom types.

| Model / Paper                            | Scheduler                                                                                                                                                                                                  | Main Datasets   | Domain                                                                                                          |
|------------------------------------------|------------------------------------------------------------------------------------------------------------------------------------------------------------------------------------------------------------|-----------------|-----------------------------------------------------------------------------------------------------------------|
| <b>TargetDiff</b> (Guan et al., 2023)    | $\alpha_t = \exp\left(-\frac{5}{6}[\log(1 + e^{12(t-\frac{1}{2})}) - \log(1 + e^{-6})]\right)$<br>$\beta_t = \sqrt{1 - \exp\left(-\frac{5}{3}[\log(1 + e^{12(t-\frac{1}{2})}) - \log(1 + e^{-6})]\right)}$ | CrossDocked2020 | $\mathbb{R}^{3N} \times \mathcal{A}^N$                                                                          |
| <b>D3FG</b> (Lin et al., 2023)           | $\alpha_t = \cos\left(\frac{\pi}{2}t\right)$<br>$\beta_t = \sin\left(\frac{\pi}{2}t\right)$                                                                                                                | CrossDocked2020 | $\mathbb{R}^{3(N_{\text{fg}}+N_{\text{at}})} \times \mathcal{A}_{\text{fg}}^N \times \mathcal{A}_{\text{at}}^N$ |
| <b>DiffSBDD</b> (Schneuing et al., 2024) | $\alpha_t = \sqrt{1 - (1 - (t - 1)^2)^2}$<br>$\beta_t = 1 - (t - 1)^2$                                                                                                                                     | CrossDocked2020 | $\mathbb{R}^{3N+A^N}$                                                                                           |
| <b>BindDM</b> (Huang et al., 2024b)      | $\alpha_t = \exp\left(-\frac{5}{6}[\log(1 + e^{12(t-\frac{1}{2})}) - \log(1 + e^{-6})]\right)$<br>$\beta_t = \sqrt{1 - \exp\left(-\frac{5}{3}[\log(1 + e^{12(t-\frac{1}{2})}) - \log(1 + e^{-6})]\right)}$ | CrossDocked2020 | $\mathbb{R}^{3N} \times \mathcal{A}^N$                                                                          |
| <b>DualDiff</b> (Huang et al., 2024a)    | $\alpha_t = \exp\left(-\frac{5}{6}[\log(1 + e^{12(t-\frac{1}{2})}) - \log(1 + e^{-6})]\right)$<br>$\beta_t = \sqrt{1 - \exp\left(-\frac{5}{3}[\log(1 + e^{12(t-\frac{1}{2})}) - \log(1 + e^{-6})]\right)}$ | CrossDocked2020 | $\mathbb{R}^{3N+A^N}$                                                                                           |
| <b>MolSnapper</b> (Ziv et al., 2025)     | $\alpha_t = \cos\left(\frac{\pi}{2}t\right)$<br>$\beta_t = \sin\left(\frac{\pi}{2}t\right)$                                                                                                                | CrossDocked2020 | $\mathbb{R}^{3N} \times \mathcal{A}^N$                                                                          |
| <b>PAFlow</b> (Zhou et al., 2025)        | $\alpha_t = \exp\left(-\frac{5}{6}[\log(1 + e^{12(t-\frac{1}{2})}) - \log(1 + e^{-6})]\right)$<br>$\beta_t = \sqrt{1 - \exp\left(-\frac{5}{3}[\log(1 + e^{12(t-\frac{1}{2})}) - \log(1 + e^{-6})]\right)}$ | CrossDocked2020 | $\mathbb{R}^{3N} \times \mathcal{A}^N$                                                                          |
| <b>MolFORM</b> (Huang & Zhang, 2025)     | $\alpha_t = 1 - t$<br>$\beta_t = t$                                                                                                                                                                        | CrossDocked2020 | $\mathbb{R}^{3N} \times \mathcal{A}^N$                                                                          |

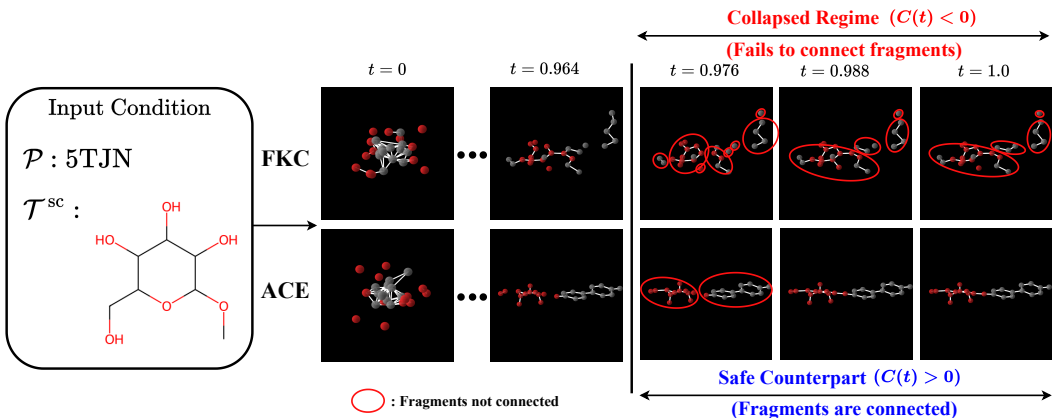

Figure E.4: **Impact of Marginal Path Collapse on molecular generation.** We compare sampling trajectories for FKC and ACE on the scaffold-decoration task ( $\omega = 1.3$ , 500 steps). Both methods target the same distribution  $p_\omega(\mathcal{M}) \propto p(\mathcal{M})(p(\mathcal{M} | \mathcal{T}^{\text{sc}}, \mathcal{P})/p(\mathcal{M}))^\omega$ . Crucially, FKC enters a collapsed regime for  $t \in (0.974, 1)$  where the path existence criterion is violated ( $C(t) < 0$ ). This theoretical singularity manifests empirically as a failure to assemble, resulting in disjoint fragments (top row). In contrast, ACE employs the bump correction  $B(t) = 30t(1 - t)$  to guarantee  $C(t) > 0$  throughout the trajectory, reliably ensuring the successful formation of a connected, chemically valid molecule (bottom row).

## E.2 PREVALENCE AND CONSEQUENCES OF MARGINAL PATH COLLAPSE

To confirm that Marginal Path Collapse is a systematic vulnerability rather than an edge case, we present a quantitative analysis of its frequency across standard model combinations and examine its downstream impact on generation quality.

**Systematic Prevalence of Collapse.** We evaluated all  $5^3 = 125$  annealed compositions of three experts  $h_t = q_t^{(1)}(q_t^{(2)}/q_t^{(3)})^w$  formed from five standard noise schedules: DDPM (Ho et al., 2020), cosine (Nichol & Dhariwal, 2021), sigmoid (Xu et al., 2022), linear (Lipman et al., 2023), and polynomial (Hoogeboom et al., 2022a). Excluding trivial homogeneous combinations, the results confirm that path collapse is a widespread failure mode. As shown in Table E.5, the collapse rate for heterogeneous compositions starts at **41%** even at a unit guidance scale ( $w = 1.0$ ). Crucially, as the guidance scale increases, as in standard practice to improve sample quality, the collapse rate rises sharply, reaching **66%** at moderate guidance ( $w = 2.0$ ) and **80%** at high guidance ( $w = 15$ ). This indicates that in heterogeneous compositions, operating on invalid paths is the statistical norm, not the exception.

Table E.5: Frequency of Marginal Path Collapse across 100 heterogeneous schedule compositions. Higher guidance scales  $w$  drastically increase the likelihood of encountering invalid paths.

| Guidance Scale ( $w$ ) | # Collapses | % Collapses |
|------------------------|-------------|-------------|
| 1.0                    | 41          | 41%         |
| 1.1                    | 47          | 47%         |
| 1.5                    | 52          | 52%         |
| 2.0                    | 66          | 66%         |
| 7.5                    | 77          | 77%         |
| 15                     | 80          | 80%         |

**Empirical Consequences of Collapse.** The violation of the path existence criterion has tangible negative impacts on generation performance, as illustrated in Figures E.2 and E.6–E.11. We observe distinct failure modes across domains:

- **Functional Failure (Molecular Domain):** In scaffold decoration, path collapse correlates directly with the generation of chemically invalid structures. As quantified in Tables 3–4, baselines (NR, FKC) suffer from significantly higher rates of invalid samples when the criterion is violated. Figure E.4 visualizes this stark contrast: ACE produces chemically valid molecules that respect valency constraints, whereas FKC generates fragmented, disconnected structures. While inherent network approximation errors can occasionally yield invalid samples in any method, ACE’s failure rate is negligible (maintaining near-perfect validity) compared to the systemic collapse observed in baselines.
- **Distributional Failure (Synthetic Domain):** On synthetic benchmarks, the consequences manifest as a loss of distributional fidelity (Figure E.6). NR fails to effectively remove out-of-distribution samples due to its heuristic nature, regardless of path collapse (Table E.6 shows non-collapse results). More critically, FKC performance degrades because its importance weights rely on the assumption that the drift term corresponds to the score of a valid probability distribution. When path collapse occurs, the simple mixture of scores, while computationally possible, does not correspond to a score of normalizable distribution. This theoretical violation destabilizes the importance weights, leading to unpredictable behavior such as severe *mode collapse* (see trajectory plots in Figures E.7–E.11).

Marginal Path Collapse is a pervasive practical problem in heterogeneous model composition. Ignoring it leads to measurable degradation in both sample validity and distributional diversity. ACE provides the necessary theoretical and practical fix to guarantee stable, high-quality generation in these heterogeneous regimes.

Table E.6: **Metrics under Homogeneous Composition (collapse duration 0%)**. Across 5 seeds, We evaluate the scenario where all expert schedules are identical ( $\alpha_t^{(i)} = \text{DDPM}$  for all  $i$ ), resulting in a collapse duration of 0.0%. ACE criterion is naturally satisfied without correction ( $B = 0$ ), making ACE mathematically equivalent to FKC. Both methods significantly outperform the heuristic NR (CFG) baseline, which suffers from approximation errors even when the path is valid.

| Method   | $W_1(\downarrow)$                   | $W_2(\downarrow)$                   | MMD (RBF) ( $\downarrow$ )          |
|----------|-------------------------------------|-------------------------------------|-------------------------------------|
| NR (CFG) | $0.859 \pm 0.023$                   | $1.113 \pm 0.023$                   | $0.077 \pm 0.003$                   |
| FKC      | <b><math>0.162 \pm 0.019</math></b> | <b><math>0.282 \pm 0.017</math></b> | <b><math>0.012 \pm 0.001</math></b> |
| ACE      | <b><math>0.162 \pm 0.019</math></b> | <b><math>0.282 \pm 0.017</math></b> | <b><math>0.012 \pm 0.001</math></b> |

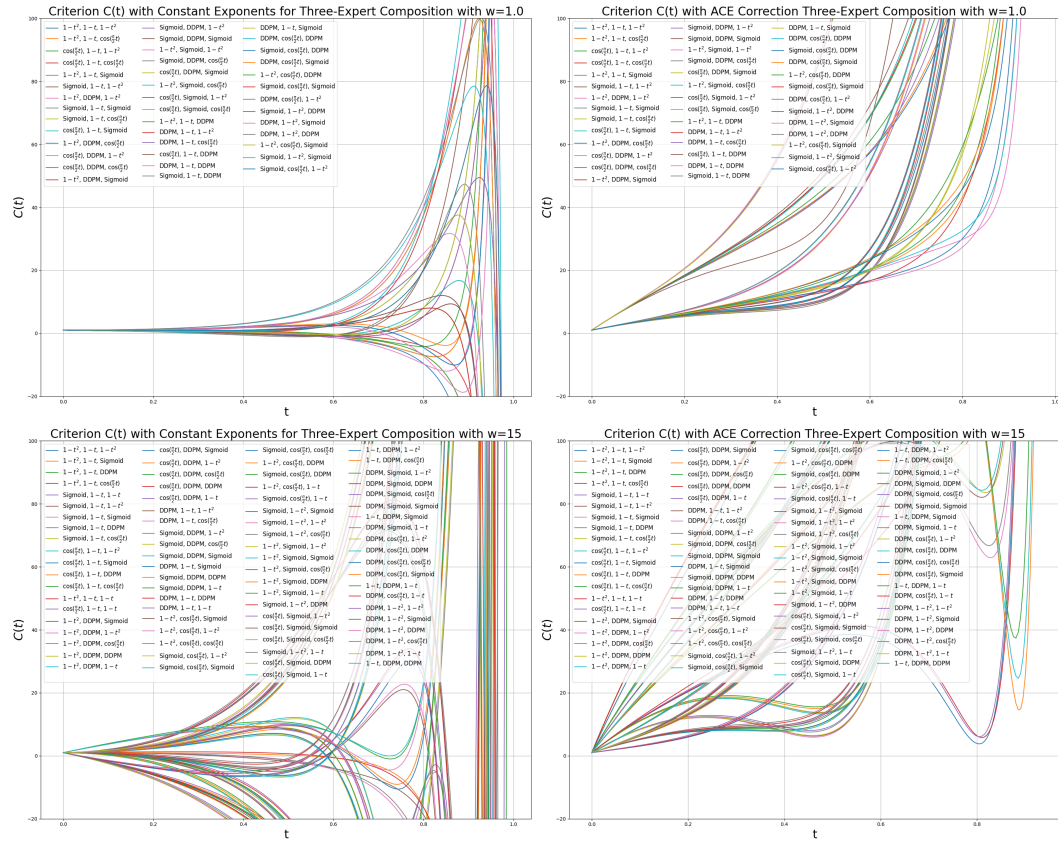

Figure E.5: **Path existence criterion  $C(t)$  across heterogeneous schedule combinations**. We visualize the evolution of  $C(t)$  for the 100 heterogeneous triplets from Table E.5 under low ( $w = 1.0$ , top) and high ( $w = 15.0$ , bottom) guidance scales. **Left (Constant Exponents)**: A significant fraction of combinations violate the existence condition ( $C(t) < 0$ ), with the frequency and magnitude of collapse increasing sharply as  $w$  increases. **Right (ACE)**: By applying the adaptive bump correction, ACE guarantees  $C(t) > 0$  for all trajectories, restoring valid probability paths even in high-guidance regimes where baselines fail. Note that the y-axis is clipped to  $[-20, 100]$  for readability; trajectories that diverge to extreme values or singularities near  $t \rightarrow 1$  are cut off once they exit the visual frame, as practical sampling terminates at  $t_{\text{end}} < 1$  (see Theorem B.3).

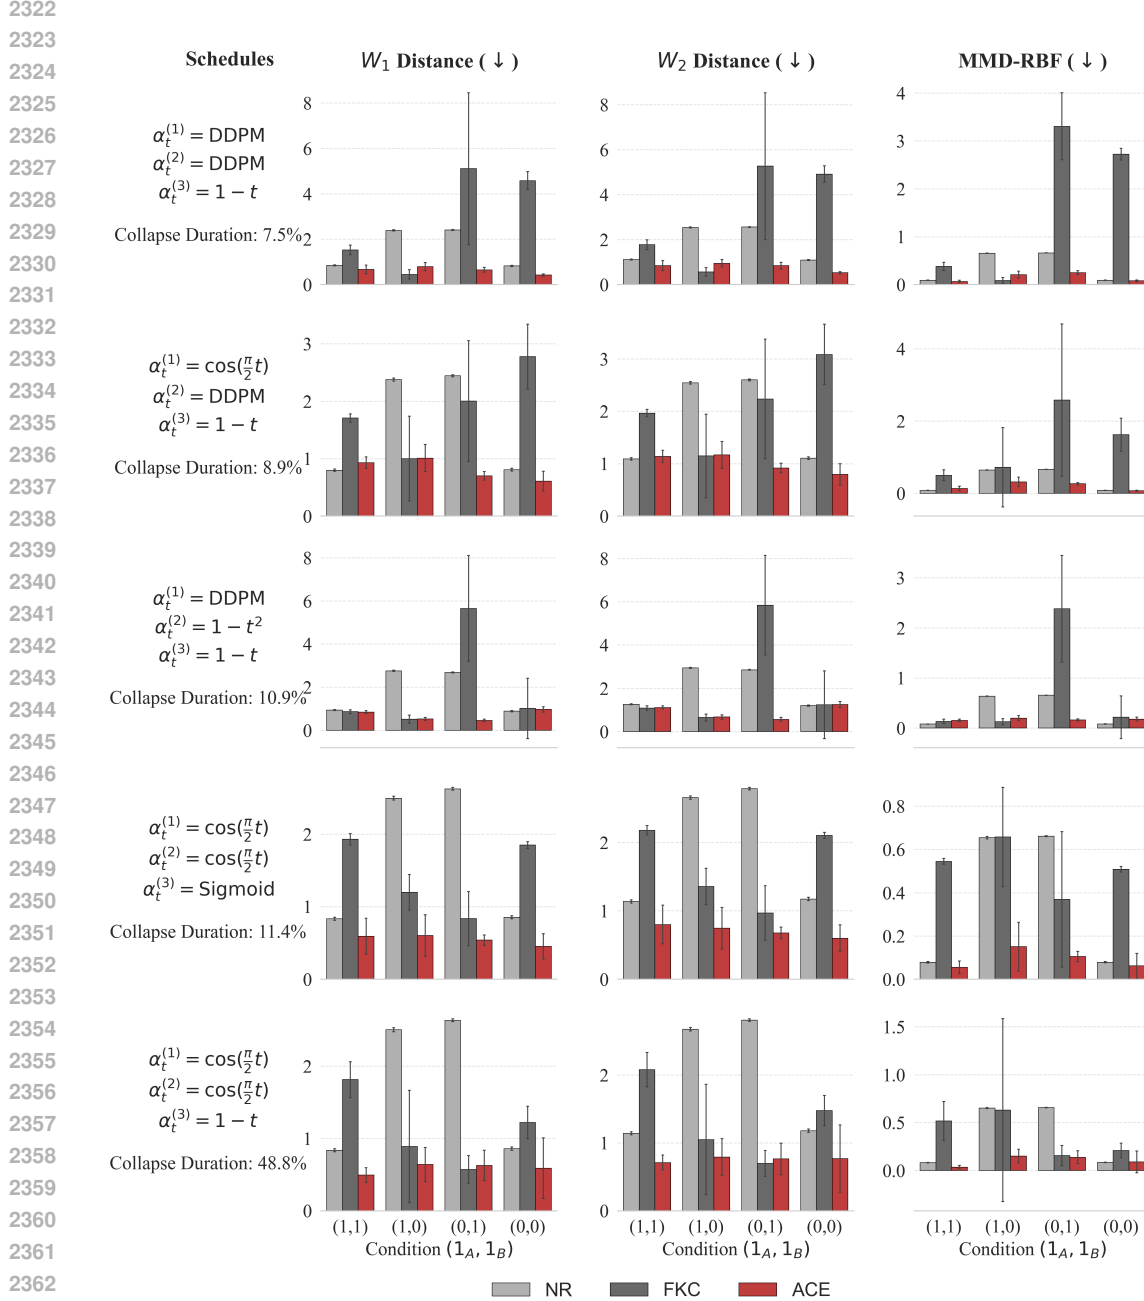

Figure E.6: **Quantitative evaluation of Heterogeneous Ratio-of-Densities Sampling.** We evaluate on a checkerboard distribution  $(x, y) \sim p_{\text{Checker}}[-4, 4]$  subject to constraints  $A = \{x \geq 0\}, B = \{x + y \geq 0\}$ . The  $x$ -axis denotes the conditioning configuration  $(\mathbf{1}_A, \mathbf{1}_B)$ . We consider the case of combining three expert models  $q_t^{(1)}, q_t^{(2)}, q_t^{(3)}$  to form the heterogeneous ratio-of-densities  $h_t = q_t^{(1)} q_t^{(2)} / q_t^{(3)}$ . The rows correspond to configurations of common noise schedules which induce path collapse, where the labels denote the noise schedule  $\alpha_t^{(i)}$  assigned to expert  $i$ . Across varying conditions and metrics ( $W_1, W_2, \text{MMD}$ ), **ACE (red)** consistently outperforms the baselines **NR** and **FKC** (gray). This performance gap reflects the practical benefits of ACE in generating samples across a guaranteed generative path, whereas baselines suffer from path collapse in heterogeneous schedule scenarios. All results are evaluated across 5 seeds with 10k samples, 1k diffusion steps, ESS threshold 0.7, and Bump 30 for ACE. See Figure. E.5 for the corresponding criterion plot.

2376  
 2377  
 2378  
 2379  
 2380  
 2381  
 2382  
 2383  
 2384  
 2385  
 2386  
 2387  
 2388  
 2389  
 2390  
 2391  
 2392  
 2393  
 2394  
 2395  
 2396  
 2397  
 2398  
 2399  
 2400  
 2401  
 2402  
 2403  
 2404  
 2405  
 2406  
 2407  
 2408  
 2409  
 2410  
 2411  
 2412  
 2413  
 2414  
 2415  
 2416  
 2417  
 2418  
 2419  
 2420  
 2421  
 2422  
 2423  
 2424  
 2425  
 2426  
 2427  
 2428  
 2429

Schedules: DDPM, DDPM,  $1 - t$

$$A = \{x \geq 0\}, \quad B = \{x + y \geq 0\}$$

$$1_A, 1_B = (0,0)$$

$$1_A, 1_B = (0,1)$$

$$1_A, 1_B = (1,0)$$

$$1_A, 1_B = (1,1)$$

(a) No Resampling (NR)

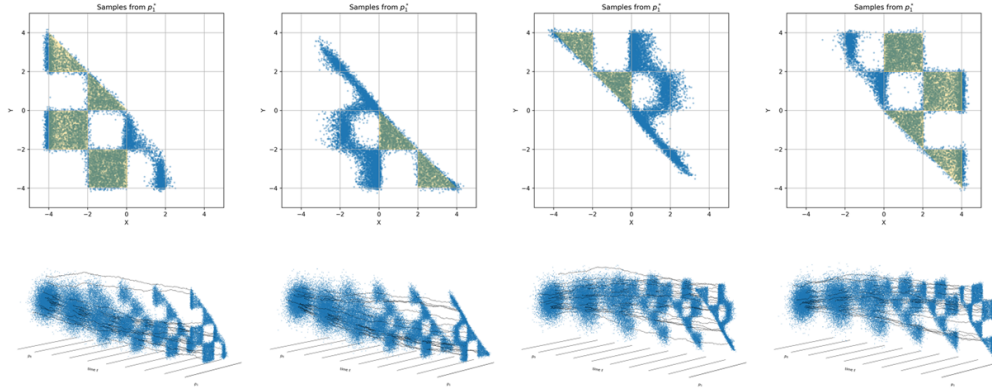

(b) Feynman-Kac Correctors (FKC)

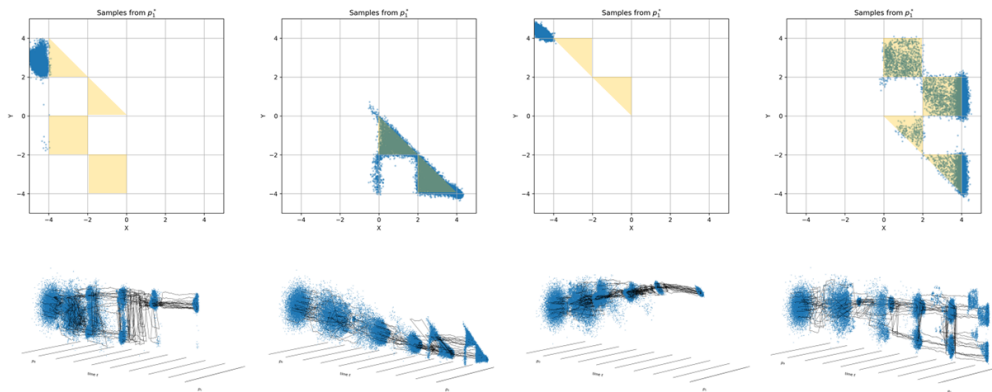

(c) Our Solution (ACE)

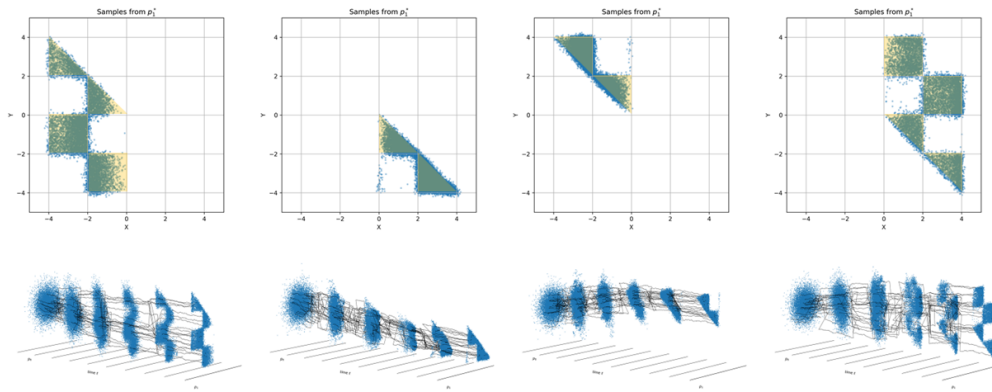

Figure E.7: **Visualization of generative trajectories and final samples.** We target the composite density  $p^*(x, y) \propto p^{(1)}(x, y | B)p^{(2)}(x | A)/p^{(3)}(x)$  using the heterogeneous schedule configuration  $(\alpha_t^{(1)}, \alpha_t^{(2)}, \alpha_t^{(3)}) = (\text{DDPM}, \text{DDPM}, 1 - t)$  and sampling with NR, FKC, and ACE.

2430  
 2431  
 2432  
 2433  
 2434  
 2435  
 2436  
 2437  
 2438  
 2439  
 2440  
 2441  
 2442  
 2443  
 2444  
 2445  
 2446  
 2447  
 2448  
 2449  
 2450  
 2451  
 2452  
 2453  
 2454  
 2455  
 2456  
 2457  
 2458  
 2459  
 2460  
 2461  
 2462  
 2463  
 2464  
 2465  
 2466  
 2467  
 2468  
 2469  
 2470  
 2471  
 2472  
 2473  
 2474  
 2475  
 2476  
 2477  
 2478  
 2479  
 2480  
 2481  
 2482  
 2483

Schedules:  $\cos\left(\frac{\pi}{2}t\right), \text{DDPM}, 1-t$

$$A = \{x \geq 0\}, \quad B = \{x + y \geq 0\}$$

$$1_A, 1_B = (0,0)$$

$$1_A, 1_B = (0,1)$$

$$1_A, 1_B = (1,0)$$

$$1_A, 1_B = (1,1)$$

(a) No Resampling (NR)

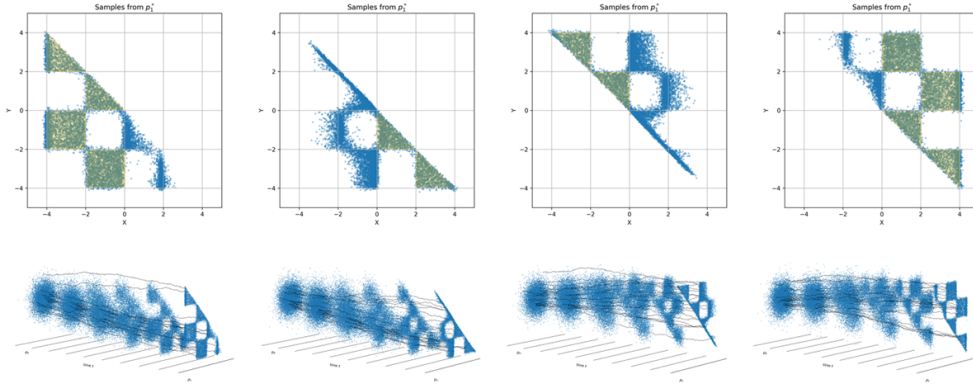

(b) Feynman-Kac Correctors (FKC)

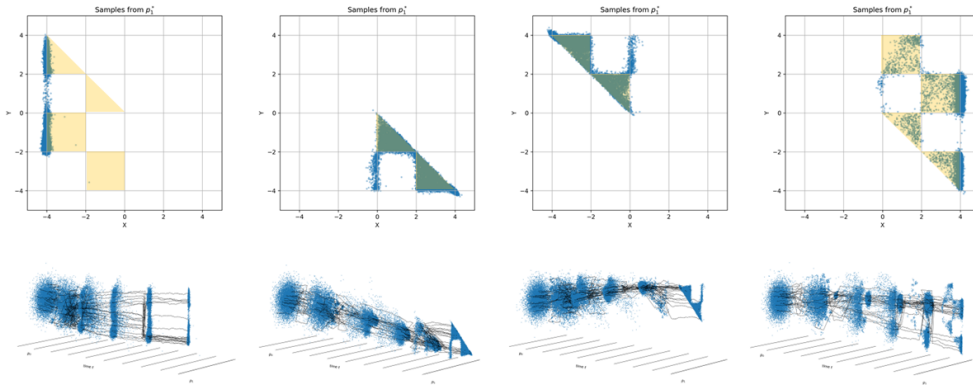

(c) Our Solution (ACE)

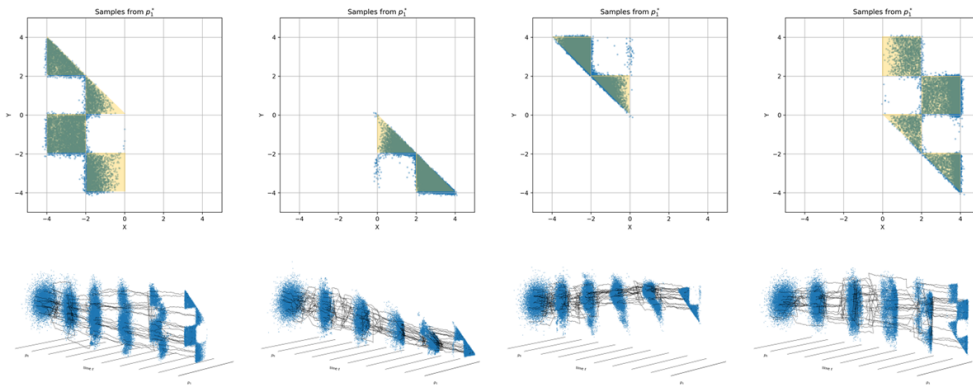

Figure E.8: **Visualization of generative trajectories and final samples.** We target the composite density  $p^*(x, y) \propto p^{(1)}(x, y | B)p^{(2)}(x | A)/p^{(3)}(x)$  using the heterogeneous schedule configuration  $(\alpha_t^{(1)}, \alpha_t^{(2)}, \alpha_t^{(3)}) = (\cos(\frac{\pi}{2}t), \text{DDPM}, 1-t)$  and sampling with NR, FKC, and ACE.

2484  
 2485  
 2486  
 2487  
 2488  
 2489  
 2490  
 2491  
 2492  
 2493  
 2494  
 2495  
 2496  
 2497  
 2498  
 2499  
 2500  
 2501  
 2502  
 2503  
 2504  
 2505  
 2506  
 2507  
 2508  
 2509  
 2510  
 2511  
 2512  
 2513  
 2514  
 2515  
 2516  
 2517  
 2518  
 2519  
 2520  
 2521  
 2522  
 2523  
 2524  
 2525  
 2526  
 2527  
 2528  
 2529  
 2530  
 2531  
 2532  
 2533  
 2534  
 2535  
 2536  
 2537

Schedules: DDPM,  $1 - t^2, 1 - t$

$$A = \{x \geq 0\}, \quad B = \{x + y \geq 0\}$$

$$1_A, 1_B = (0,0)$$

$$1_A, 1_B = (0,1)$$

$$1_A, 1_B = (1,0)$$

$$1_A, 1_B = (1,1)$$

(a) No Resampling (NR)

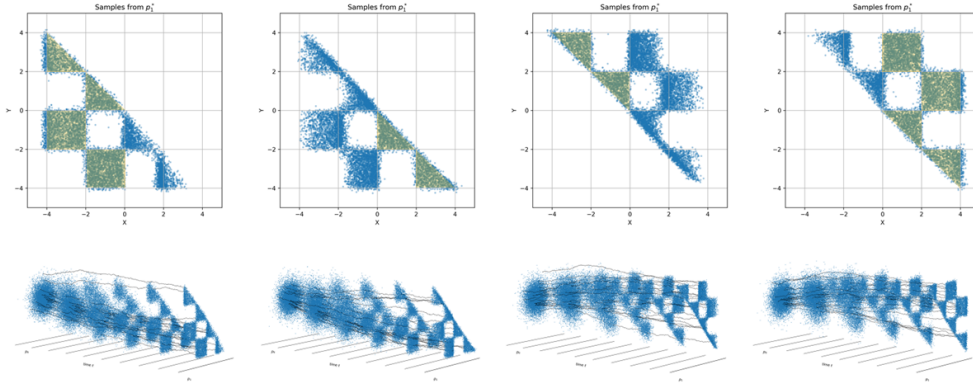

(b) Feynman-Kac Correctors (FKC)

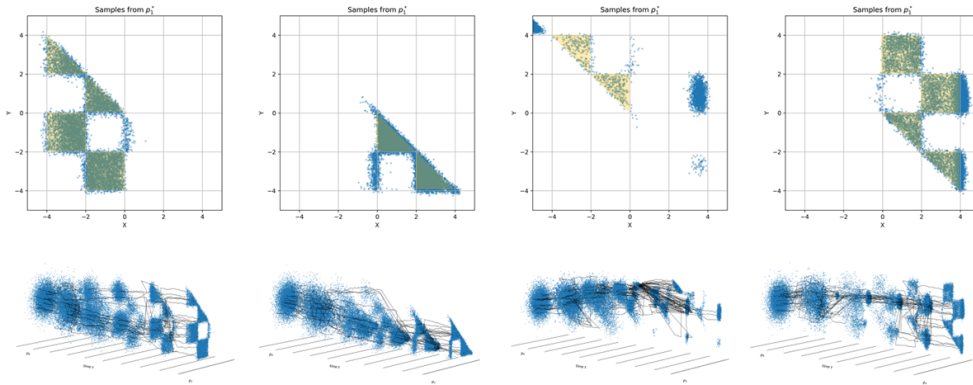

(c) Our Solution (ACE)

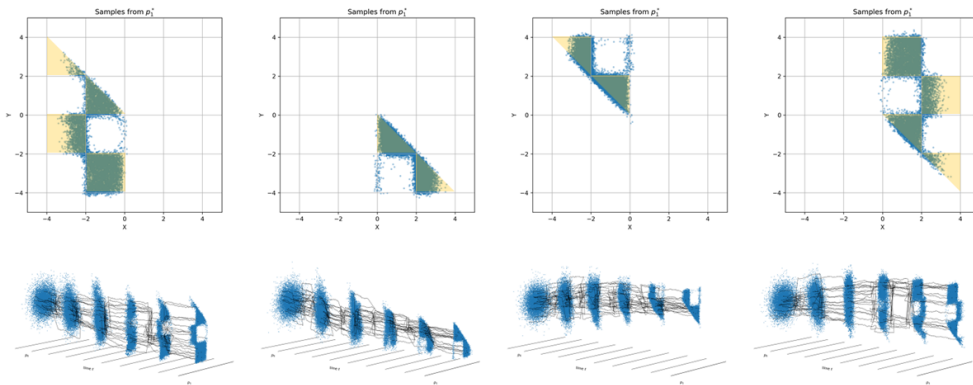

Figure E.9: **Visualization of generative trajectories and final samples.** We target the composite density  $p^*(x, y) \propto p^{(1)}(x, y | B)p^{(2)}(x | A)/p^{(3)}(x)$  using the heterogeneous schedule configuration  $(\alpha_t^{(1)}, \alpha_t^{(2)}, \alpha_t^{(3)}) = (\text{DDPM}, 1 - t^2, 1 - t)$  and sampling with NR, FKC, and ACE.

2538  
 2539  
 2540  
 2541  
 2542  
 2543  
 2544  
 2545  
 2546  
 2547  
 2548  
 2549  
 2550  
 2551  
 2552  
 2553  
 2554  
 2555  
 2556  
 2557  
 2558  
 2559  
 2560  
 2561  
 2562  
 2563  
 2564  
 2565  
 2566  
 2567  
 2568  
 2569  
 2570  
 2571  
 2572  
 2573  
 2574  
 2575  
 2576  
 2577  
 2578  
 2579  
 2580  
 2581  
 2582  
 2583  
 2584  
 2585  
 2586  
 2587  
 2588  
 2589  
 2590  
 2591

Schedules:  $\cos\left(\frac{\pi}{2}t\right), \cos\left(\frac{\pi}{2}t\right), Sigmoid$

$$A = \{x \geq 0\}, \quad B = \{x + y \geq 0\}$$

$$1_A, 1_B = (0,0)$$

$$1_A, 1_B = (0,1)$$

$$1_A, 1_B = (1,0)$$

$$1_A, 1_B = (1,1)$$

(a) No Resampling (NR)

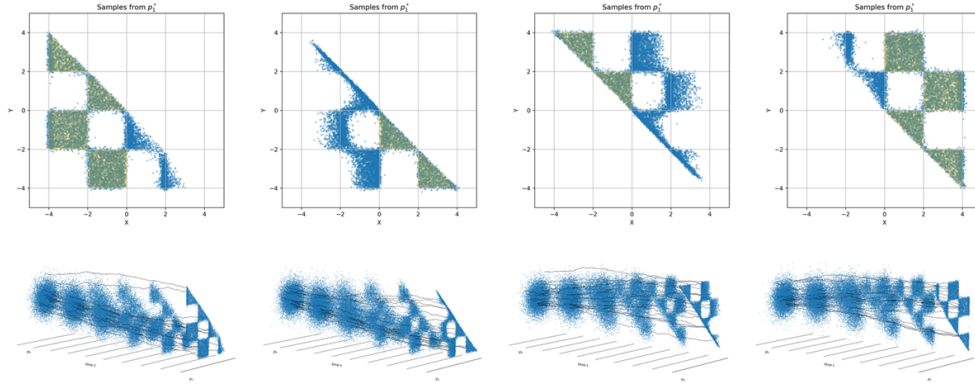

(b) Feynman-Kac Correctors (FKC)

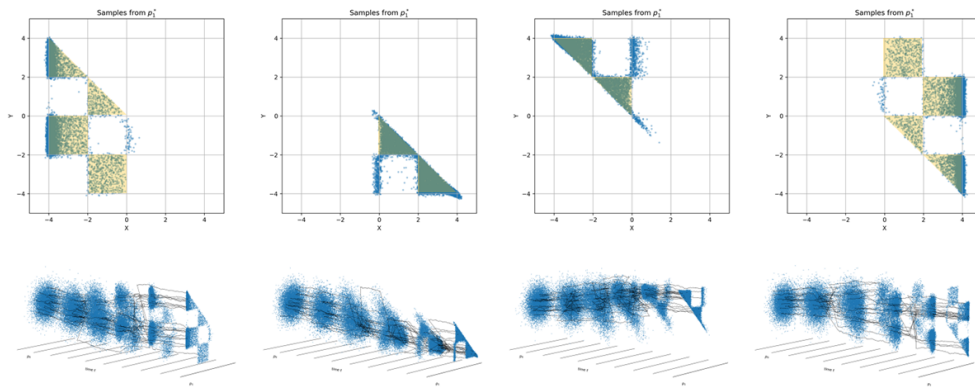

(c) Our Solution (ACE)

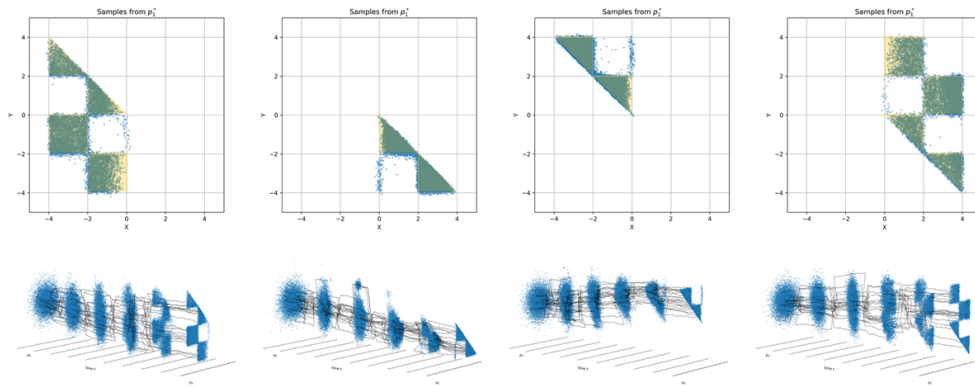

Figure E.10: **Visualization of generative trajectories and final samples.** We target the composite density  $p^*(x, y) \propto p^{(1)}(x, y | B)p^{(2)}(x | A)/p^{(3)}(x)$  using the heterogeneous schedule configuration  $(\alpha_t^{(1)}, \alpha_t^{(2)}, \alpha_t^{(3)}) = (\cos(\frac{\pi}{2}t), \cos(\frac{\pi}{2}t), Sigmoid)$  and sampling with NR, FKC, and ACE.

2592  
 2593  
 2594  
 2595  
 2596  
 2597  
 2598  
 2599  
 2600  
 2601  
 2602  
 2603  
 2604  
 2605  
 2606  
 2607  
 2608  
 2609  
 2610  
 2611  
 2612  
 2613  
 2614  
 2615  
 2616  
 2617  
 2618  
 2619  
 2620  
 2621  
 2622  
 2623  
 2624  
 2625  
 2626  
 2627  
 2628  
 2629  
 2630  
 2631  
 2632  
 2633  
 2634  
 2635  
 2636  
 2637  
 2638  
 2639  
 2640  
 2641  
 2642  
 2643  
 2644  
 2645

Schedules:  $\cos\left(\frac{\pi}{2}t\right), \cos\left(\frac{\pi}{2}t\right), 1-t$

$A = \{x \geq 0\}, \quad B = \{x + y \geq 0\}$

$1_A, 1_B = (0,0)$

$1_A, 1_B = (0,1)$

$1_A, 1_B = (1,0)$

$1_A, 1_B = (1,1)$

(a) No Resampling (NR)

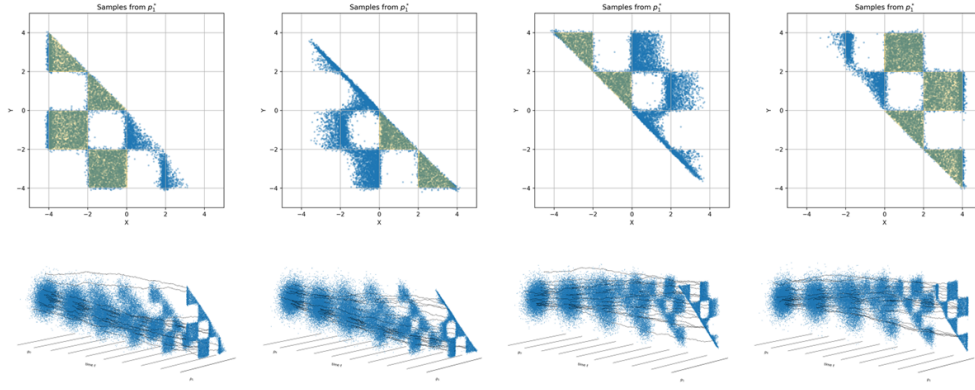

(b) Feynman-Kac Correctors (FKC)

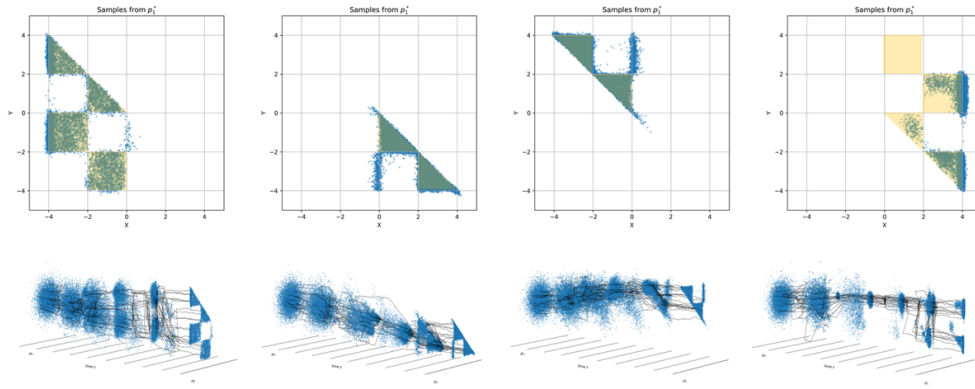

(c) Our Solution (ACE)

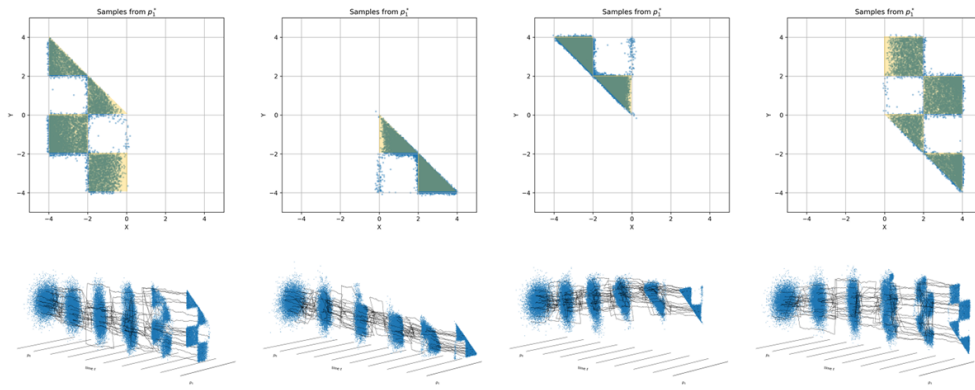

Figure E.11: **Visualization of generative trajectories and final samples.** We target the composite density  $p^*(x, y) \propto p^{(1)}(x, y | B)p^{(2)}(x | A)/p^{(3)}(x)$  using the heterogeneous schedule configuration  $(\alpha_t^{(1)}, \alpha_t^{(2)}, \alpha_t^{(3)}) = (\cos(\frac{\pi}{2}t), \cos(\frac{\pi}{2}t), 1-t)$  and sampling with NR, FKC, and ACE.

## E.3 NECESSITY OF TASK-SPECIFIC NOISE SCHEDULERS

A growing body of work on task-specific noise scheduling shows that different generative tasks require different allocations of noise across the denoising trajectory. This follows from the view that diffusion operates in two regimes, high-noise for global exploration and low-noise for local refinement, whose relative importance varies by task. We further validate this trend in molecular generation, and note that recent advances in learnable or adaptive noise schedulers also reinforce this perspective. Together, these observations motivate the use of adaptive or customized noise schedulers, and consequently, heterogeneous scheduler combinations.

**Table E.7:** Comparison of noise regimes and average regime statistics per tasks in Tables E.2,E.3,E.4. The comparison is based on the literature perspective (Choi et al., 2022; Rothchild et al., 2023; Chen, 2023; Pavlova & Wei, 2025). Asterisk(\*) indicates significant difference from DN ( $p < 0.001$ ).  $|\mathcal{R}_H|$ ,  $|\mathcal{R}_L|$  are the lengths of two regimes.

| (A) Comparison of High-Noise vs. Low-Noise Regimes (Choi et al., 2022; Rothchild et al., 2023; Chen, 2023; Pavlova & Wei, 2025) |                        |               |                      |                   |  |  |
|---------------------------------------------------------------------------------------------------------------------------------|------------------------|---------------|----------------------|-------------------|--|--|
| Regime                                                                                                                          | Dynamics               | Feature Scale | Priority             | Role in Denoising |  |  |
| $\mathcal{R}_H$ (High-Noise)                                                                                                    | Large Transitions      | Global        | structure            | Exploration       |  |  |
| $\mathcal{R}_L$ (Low-Noise)                                                                                                     | Small corrective steps | Local         | fine-grained details | Refinement        |  |  |

  

| (B) Average Noise Regime Statistics per Molecular Tasks in Tables E.2,E.3,E.4 |                 |                  |                                 |                   |                   |                                   |
|-------------------------------------------------------------------------------|-----------------|------------------|---------------------------------|-------------------|-------------------|-----------------------------------|
| Task                                                                          | Global vs Local | Cond. vs Uncond. | Exploration vs Local Refinement | $ \mathcal{R}_H $ | $ \mathcal{R}_L $ | $ \mathcal{R}_H / \mathcal{R}_L $ |
| DN                                                                            | Global          | Uncond.          | Exploration                     | 0.53              | 0.47              | 1.11                              |
| CONF                                                                          | Local           | Cond.            | Local Refinement                | 0.47*             | 0.53*             | 0.89*                             |
| SBDD                                                                          | Local           | Cond.            | Local Refinement                | 0.48*             | 0.52*             | 0.91*                             |

**High-noise vs. low-noise regimes.** Recent analyses (Choi et al., 2022; Rothchild et al., 2023; Chen, 2023; Pavlova & Wei, 2025) in Table E.9 characterize two complementary denoising phases. The **high-noise regime** ( $\mathcal{R}_H$ ) performs large transitions that support **global exploration** and formation of coarse structure. The **low-noise regime** ( $\mathcal{R}_L$ ) reduces to **small corrective steps** that refine **local, fine-grained features**. Effective scheduling therefore requires balancing these phases according to task needs. This distinction is summarized in Table E.7(A).

**Empirically validated trends in conditional vs. unconditional molecular generation.** As shown in (Chen, 2023), the roles of  $\mathcal{R}_H$  and  $\mathcal{R}_L$  indicate that *larger images benefit from a longer  $\mathcal{R}_H$* , reflecting their need for stronger exploratory behavior. The insights naturally transfer to molecules. Unconditional generation (DN) needs to explore many possible molecular shapes, so it naturally relies more on the broader, exploratory behavior of  $\mathcal{R}_H$ . Conditional tasks (CONF, SBDD), however, must fit specific structural requirements, and therefore gain more from the precise, detail-oriented corrections that occur in  $\mathcal{R}_L$ .

We empirically confirm that existing molecular schedulers adhere to this pattern (Tables E.2, E.3, E.4). Following Pavlova & Wei (2025), we divide noise phases using  $\text{SNR} \geq 1$  ( $\mathcal{R}_H$ ) and  $\text{SNR} < 1$  ( $\mathcal{R}_L$ ). For each model, we compute the interval lengths  $|\mathcal{R}_H|$ ,  $|\mathcal{R}_L|$ , and their ratio, then average across models per task. The results in Table E.7(B) show clear trends: DN favors  $\mathcal{R}_H$ , whereas CONF and SBDD prioritize  $\mathcal{R}_L$ .

These results reinforce our central claim: *heterogeneous noise schedulers are not only reasonable but necessary* for the molecular tasks considered in Section E.2.

**Recent trends in task-specific scheduler design.** Recent works further emphasize that optimal schedules depend on task characteristics (Table E.8). Image models adopt learned or adaptive schedulers (Sahoo et al., 2024), while molecular models employ component-specific or trajectory-based schedules (Vignac et al., 2023; Seo et al., 2025). These methods directly challenge the assumption of a universal, fixed schedule.

**Foundational regime analysis.** Table E.9 compiles key works formalizing these roles. The low-noise regime ( $\mathcal{R}_L$ ) is consistently identified as the phase responsible for *precise, fine-scale refinement*, while the high-noise regime ( $\mathcal{R}_H$ ) drives *exploration and diversity*. These findings directly support task-specific allocations of denoising effort.

2700  
2701  
2702  
2703  
2704  
2705  
2706  
2707  
2708  
2709  
2710  
2711  
2712  
2713  
2714  
2715  
2716  
2717  
2718  
2719  
2720  
2721  
2722  
2723  
2724  
2725  
2726  
2727  
2728  
2729  
2730  
2731  
2732  
2733  
2734  
2735  
2736  
2737  
2738  
2739  
2740  
2741  
2742  
2743  
2744  
2745  
2746  
2747  
2748  
2749  
2750  
2751  
2752  
2753

Table E.8: References on Task-Specific and Adaptive Scheduling

| Reference             | Contribution                                                                                             |
|-----------------------|----------------------------------------------------------------------------------------------------------|
| Vignac et al. (2023)  | Introduces component-specific molecular noise scheduling.                                                |
| Lee et al. (2024)     | Presents a fully data-driven adaptive scheduler for time-series diffusion.                               |
| Sahoo et al. (2024)   | Develops MuLAN: learned multivariate adaptive noise processes.                                           |
| Seo et al. (2025)     | Proposes per-element optimized forward trajectories for molecules.                                       |
| Sorokin et al. (2025) | Demonstrates adaptive allocation between $\mathcal{R}_H$ (exploration) and $\mathcal{R}_L$ (refinement). |
| Choi et al. (2025)    | Uses distinct channel-wise schedules to balance the diversity-accuracy trade-off.                        |

Table E.9: Foundational References for Noise Regime Mechanism

| Reference               | Contribution                                                                                                  |
|-------------------------|---------------------------------------------------------------------------------------------------------------|
| Choi et al. (2022)      | Identifies that certain noise levels offer a proper pretext task for the model to learn rich visual concepts. |
| Rothchild et al. (2023) | Analyze the diffusion dynamics in molecular generative models.                                                |
| Chen (2023)             | Shows that optimal schedules vary with task and resolution.                                                   |
| Pavlova & Wei (2025)    | Identifies $\mathcal{R}_L$ as the phase in which precision and fine-scale structure dominate.                 |

#### E.4 ACE BEYOND COLLAPSE: COMPOSITIONAL IMAGE GENERATION IN THE HOMOGENEOUS REGIME

In the main text, ACE is used primarily to *repair* heterogeneous compositions where the path-existence criterion fails and Marginal Path Collapse occurs. In this section, we show that the same theory also yields *gains beyond collapse avoidance* on a compositional image generation benchmark, even in a strictly homogeneous setting where  $C(t) > 0$  everywhere.

Reviewer  
naNy

**Tail concentration in the homogeneous  $\alpha_t$  regime.** Even when the path-existence criterion  $C(t) > 0$  holds everywhere (i.e., no collapse), the coefficient  $C(t)$  still controls how tightly the composed distribution  $p_t^*$  is concentrated. The following result summarizes this dependence and motivates why time-varying exponents can improve sampling quality even in the homogeneous regime.

**Proposition E.1** (Tail control from a quadratic envelope). *Let  $\{h_t\}_{t \in [0,1]}$  be a family of non-negative functions on  $\mathbb{R}^d$  and let  $p_t^*(x) := h_t(x)/Z_t$  be well defined, so  $Z_t := \int_{\mathbb{R}^d} h_t(x) dx < \infty$  for all  $t \in [0, 1]$ . Suppose there exist constants  $m_* > 0$ ,  $K > 0$ ,  $B > 0$ , and a function  $C : [0, 1] \rightarrow (0, \infty)$  such that  $Z_t \geq m_*$  for all  $t \in [0, 1]$  and*

$$h_t(x) \leq K \exp\left(-\frac{1}{2}C(t) \|x\|^2 + B\|x\|\right) \quad \text{for all } x \in \mathbb{R}^d, t \in [0, 1].$$

*Then there exist constants  $K_0 > 0$  and  $R_0 > 0$ , independent of  $t$ , such that for all  $t$  with  $C(t) > 0$  and all  $R \geq R_0$ ,*

$$\mathbb{P}_{X \sim p_t^*}(\|X\| > R) \leq K_0 \exp\left(\frac{B^2}{2C(t)}\right) C(t)^{-\frac{d}{2}} \exp\left(-\frac{1}{16}C(t) R^2\right). \quad (\text{E.15})$$

*Consequently, for any  $\varepsilon \in (0, 1)$ , the  $(1 - \varepsilon)$ -quantile radius*

$$R_t(\varepsilon) := \inf\{R > 0 : \mathbb{P}(\|X\| \leq R) \geq 1 - \varepsilon\}$$

*satisfies*

$$R_t(\varepsilon) \leq R_0 \vee \sqrt{\frac{16}{C(t)} \left[ \log \frac{K_0}{\varepsilon} + \frac{B^2}{2C(t)} - \frac{d}{2} \log C(t) \right]}. \quad (\text{E.16})$$

*In particular, for fixed  $\varepsilon$  and  $d$ , larger values of  $C(t)$  yield tighter tails and smaller effective radii  $R_t(\varepsilon)$  for  $p_t^*$ , up to logarithmic corrections.*

2754 *Proof.* Fix  $t$  with  $C(t) > 0$ . Complete the square yields:

$$2755 \quad h_t(x) \leq K \exp\left(\frac{B^2}{2C(t)}\right) \exp\left(-\frac{1}{2}C(t)\left(\|x\| - \frac{B}{C(t)}\right)^2\right).$$

2756 Let  $C_{\min} := \inf_{s \in [0,1]} C(s) > 0$ , which is positive on any compact subinterval where  $C(t) > 0$ .  
 2759 Choose  $R_0 \geq 2B/C_{\min}$  such that for all  $t$  and all  $R \geq R_0$  we have  $B/C(t) \leq B/C_{\min} \leq R_0/2 \leq R/2$ . Then, for any  $R \geq R_0$  and any  $x$  with  $\|x\| \geq R$ ,

$$2761 \quad \|x\| - \frac{B}{C(t)} \geq \frac{\|x\|}{2},$$

2763 and thus

$$2764 \quad h_t(x) \leq K \exp\left(\frac{B^2}{2C(t)}\right) \exp\left(-\frac{1}{8}C(t)\|x\|^2\right).$$

2766 Integrating over  $\{\|x\| > R\}$  in radial coordinates ( $dx = S_d r^{d-1} dr$ ) yields

$$2767 \quad \int_{\|x\| > R} h_t(x) dx \leq K \exp\left(\frac{B^2}{2C(t)}\right) \int_{r=R}^{\infty} \exp\left(-\frac{1}{8}C(t)r^2\right) S_d r^{d-1} dr.$$

2770 By the change of variables  $y = \sqrt{C(t)/8} r$ , and the Gaussian tail bound  $\mathbb{P}(z > s) \leq 2 \exp(-s^2/2)$   
 2771 for  $z \sim \mathcal{N}(0, 1)$  (Ross et al., 1998), there exists a constant  $C_d > 0$  (depending only on  $d$ ) such that

$$2772 \quad \int_{r=R}^{\infty} \exp\left(-\frac{1}{8}C(t)r^2\right) S_d r^{d-1} dr \leq C_d C(t)^{-\frac{d}{2}} \exp\left(-\frac{1}{16}C(t)R^2\right).$$

2774 Hence

$$2775 \quad \int_{\|x\| > R} h_t(x) dx \leq K C_d \exp\left(\frac{B^2}{2C(t)}\right) C(t)^{-\frac{d}{2}} \exp\left(-\frac{1}{16}C(t)R^2\right).$$

2777 By assumption,  $Z_t \geq m_* > 0$  uniformly in  $t$ , so

$$2778 \quad \mathbb{P}_{p_t^*}(\|X\| > R) = \frac{1}{Z_t} \int_{\|x\| > R} h_t(x) dx \leq \frac{K C_d}{m_*} \exp\left(\frac{B^2}{2C(t)}\right) C(t)^{-\frac{d}{2}} \exp\left(-\frac{1}{16}C(t)R^2\right).$$

2781 Setting  $K_0 := K C_d / m_*$  gives the tail bound in Equation E.15. Finally, to get the quantile radius, it  
 2782 suffices to enforce the right-hand side to be at most  $\varepsilon$  and solve for  $R$ . This yields

$$2783 \quad R^2 \geq \frac{16}{C(t)} \left[ \log \frac{K_0}{\varepsilon} + \frac{B^2}{2C(t)} - \frac{d}{2} \log C(t) \right],$$

2785 and taking  $R \geq R_0$  proves the bound in Equation E.16.  $\square$

2787 **Application to heterogeneous ratio-of-densities.** In the setting of Theorem B.1, each lifted expert  
 2788  $\tilde{q}_t^{(i)}$  admits upper bounds of the form

$$2789 \quad \tilde{q}_t^{(i)}(x) \leq C_{+,i} \exp\left(-\frac{1}{2} \sum_{k \in I_i} a_{i,k}(t) x_k^2 + B_i \|x\|\right),$$

2792 with  $a_{i,k}(t) \geq 0$  and constants  $C_{+,i}, B_i > 0$  independent of  $t$ . Multiplying these bounds and raising  
 2793 to the exponents  $\gamma_i(t)$  yields

$$2794 \quad h_t(x) \leq K \exp\left(-\frac{1}{2} \sum_{k=1}^d C_k(t) x_k^2 + B \|x\|\right),$$

2797 where  $K, B > 0$  are uniform constants and  $C_k(t)$  are precisely the coordinate-wise coefficients from  
 2798 Equation 4. Defining  $C(t) := \min_k C_k(t)$ , we have  $\sum_k C_k(t) x_k^2 \geq C(t) \|x\|^2$ , so the envelope  
 2799 matches the form in Proposition E.1. Theorem B.1 also implies that  $h_t \in L^1(\mathbb{R}^d)$  and that the  
 2800 normalizing constants  $Z_t$  are uniformly bounded below on any compact set where  $C_k(t) > 0$ .  
 2801 Therefore, all assumptions of Proposition E.1 hold for our heterogeneous ratio-of-densities path  
 2802  $p_t^* = h_t/Z_t$ , and the tail and quantile-radius bounds apply directly with this choice of  $C(t)$ .

2803 This proposition shows that even when  $C(t) > 0$  everywhere (no collapse), the *magnitude* of  $C(t)$   
 2804 still governs how concentrated  $p_t^*$  is: for fixed  $\varepsilon$ , the radius  $R_t(\varepsilon)$  shrinks as  $C(t)$  grows (up to  
 2805 logarithmic factors). Thus, increasing  $C(t)$  at intermediate times (for example, via the time-varying  
 2806 exponents of ACE) tightens the tails of  $p_t^*$  and reduces its effective spatial extent. In practice, this  
 2807 suppresses large intermediate spreads, stabilizes importance weights, and improves sample quality,  
 2808 as we observe both in the 1D ratio-of-Gaussians trajectory and image experiment described below.

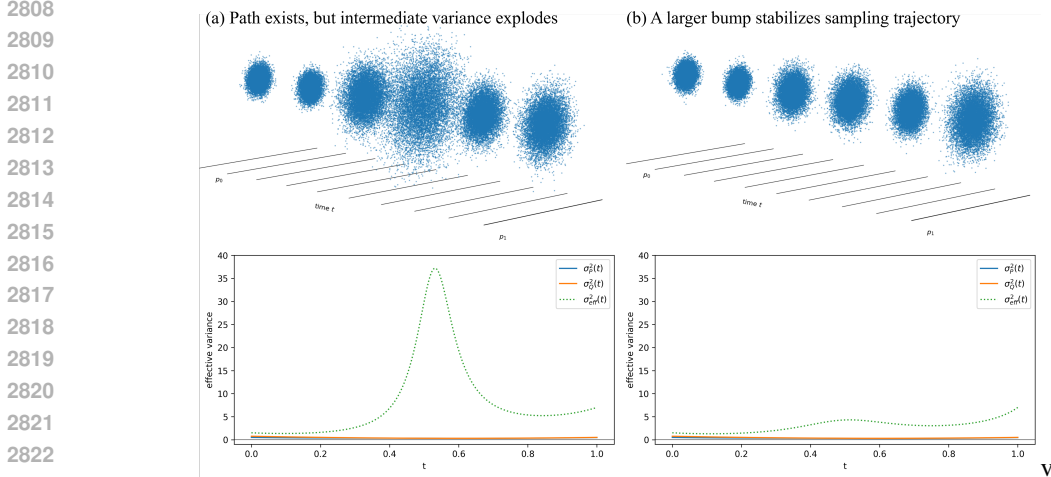

Figure E.12: **Stabilizing a ratio-of-Gaussians path via the bump parameter.** We illustrate the effect of the path-existence coefficient  $C(t)$  on a 1D ratio-of-Gaussians example (Eq. 3). (a) With a small bump applied to  $q_t^{(1)}$ ,  $C(t) > 0$  but dips close to zero around  $t = 0.5$ , leading to a very broad intermediate density: the effective variance (green curve) exhibits a peak, and particle trajectories become highly dispersed. This behavior is consistent with Proposition E.1, which shows that small  $C(t)$  yields weak tail decay and large quantile radii. (b) Increasing the bump parameter raises the lower bound of  $C(t)$  throughout the trajectory, suppressing the peak in variance and producing a much more confined intermediate distribution. The resulting path smoothly transports samples from the Gaussian prior to the compactly supported target without large variance excursions.

**Example E.4** (Compositional Image Generation). We consider compositional text-to-image generation with region-wise prompts and bounding boxes. The task is generating an image  $X$  conditioned on  $n$  region-specific object prompts  $c_{1:n}$  (with foreground masks  $F_{1:n}$ ) and a global context prompt  $C$ . The target distribution factorizes via Bayes’ rule into a product of expert likelihoods:

$$p(X | c_{1:n}, C) = \frac{1}{Z} \underbrace{p(X | C)^{\gamma_0(t)}}_{\text{Global Consistency}} \prod_{i=1}^n \underbrace{\left( \frac{p(F_i | c_i)}{p(F_i)} \right)^{\gamma_i(t)}}_{\text{Local Specifics}} \quad (\text{E.17})$$

**ACE Implementation with a Single Backbone:** Crucially, we approximate all terms using a *single* pretrained text-to-image model (Stable Diffusion (Rombach et al., 2021) v1.5 / v2.1).

- $p_\theta(X | C)$ : the base model conditioned on the global prompt.
- $p_\theta(F_i | c_i)$ : the same model, applied to the cropped region  $F_i$  (via masking) with prompt  $c_i$ .
- $p_\theta(F_i)$ : the model on  $F_i$  with a null prompt.

All experts share architecture and noise schedule, placing us in the homogeneous regime of Theorem 2.1, where the coefficient  $C(t)$  remains strictly positive and no Marginal Path Collapse occurs. In this limit, path existence is guaranteed even for constant exponents.

**ACE vs. FKC and NR in the homogeneous regime.** We apply our generic ACE sampler (Algorithm 1) to this setup by treating each region-specific term in E.17 as an expert and composing their scores and drifts as in Section 2. Since the schedules are homogeneous, ACE does not need to “rescue” a collapsing path. Instead, we use a small bump  $B = 5$  in the region exponents  $\gamma_i(t)$ , which increases  $C(t)$  locally at intermediate times while preserving the endpoint distributions.

Proposition E.1 implies that this yields a tighter intermediate concentration for  $p_t^*$ , reducing mass in off-manifold regions and stabilizing importance weights.

We compare three steering schemes using the same backbone, schedules, and hyperparameters<sup>3</sup>:

- **NR (CFG-like)**: score-difference heuristic without importance weights.
- **FKC**: constant exponents with Feynman–Kac weighting and resampling (Algorithm 2).
- **ACE**: time-varying exponents with a bump  $B = 5$  (Algorithm 1).

Because  $C(t) > 0$  everywhere, FKC and ACE both operate on valid probability paths; the only difference is the exponent schedule (i.e., constant vs. time-varying).

**Comparison with Existing Paradigms.** Existing approaches to this task generally fall into three categories: (1) Methods that train adapters like GLIGEN (Li et al., 2023b), Make-It-Count (Binyamin et al., 2025); (2) Auxiliary-guided methods like 3DIS (dewei Zhou et al., 2025) that rely on external signals (depth maps, LLMs); and (3) Architectural interventions such as box-layout guidance (Wang et al., 2024c) or attention-editing techniques (Chefer et al., 2023; Qiu et al., 2025) that modify model’s internal signals. In contrast, ACE offers a sampling strategy that achieves unbiased modular composition using a single fundamental expert model without requiring retraining, external data, or architectural changes.

**Empirical results on COCO-MIG.** We evaluate on the COCO-MIG benchmark (Zhou et al., 2024b) and report the instance attribute success ratio (%) and mIoU (%) where the instance attribute success ratio measures the fraction of region-wise instructions correctly matched in the generated image. We compare ACE against NR and FKC, multiple diffusion baselines (Rombach et al., 2021; Podell et al., 2023; Esser et al., 2024; Labs, 2024), and task-specific adapters (GLIGEN (Li et al., 2023b), InstanceDiff (Wang et al., 2024b), MIGC (Zhou et al., 2024a), 3DIS (dewei Zhou et al., 2025)). As shown in Table E.10, we observe a consistent hierarchy  $NR < FKC < ACE$  across backbones: FKC improves substantially over the heuristic NR baseline, and ACE with  $B = 5$  further improves both attribute alignment and spatial metrics, despite being applied in a regime with no path collapse. Remarkably, ACE matches or exceeds a task-specific adapter GLIGEN (Li et al., 2023b) on several metrics, while remaining completely training-free.

Qualitatively, Fig. E.13 shows that ACE produces sharply localized objects with correct attributes in their designated boxes, whereas the Stable Diffusion baseline struggles to localize objects or separate attributes. These results provide an empirical complement to Proposition E.1: even when the path-existence criterion is satisfied, carefully shaping the exponent schedule can yield *stronger* conditioning and improved sample quality.

Table E.10: Instance attribute success ratio (%) with the corresponding mIoU (%) shown in parentheses. L2–L6 denote the success ratios for tasks with 2 to 6 region-wise guidance conditions. ‘CLIP’ and ‘Local CLIP’ refer to CLIP scores computed on the entire image versus the full prompt, and on local crops versus the corresponding local prompts, respectively.

| Method                                                                                         | Backbone   | L2            | L3            | L4            | L5            | L6            | Avg           | CLIP↑ | Local CLIP↑ |
|------------------------------------------------------------------------------------------------|------------|---------------|---------------|---------------|---------------|---------------|---------------|-------|-------------|
| <i>Base Diffusion Model with global prompt</i>                                                 |            |               |               |               |               |               |               |       |             |
| SD1.5                                                                                          | SD1.5      | 5.59 (18.83)  | 4.79 (17.43)  | 2.83 (14.95)  | 2.41 (13.93)  | 2.21 (15.94)  | 3.11 (15.75)  | 24.64 | 18.36       |
| SDXL                                                                                           | SDXL       | 5.59 (19.78)  | 4.48 (18.54)  | 2.81 (16.67)  | 2.14 (15.72)  | 2.80 (18.42)  | 3.17 (17.55)  | 25.71 | 18.63       |
| SD3.5-M                                                                                        | SD3.5-M    | 8.05 (21.57)  | 8.46 (21.37)  | 6.07 (18.98)  | 5.02 (17.39)  | 4.40 (17.80)  | 5.86 (18.85)  | 26.41 | 18.77       |
| Flux.1-dev                                                                                     | Flux.1-dev | 8.83 (22.00)  | 7.50 (20.93)  | 4.86 (17.75)  | 4.53 (16.77)  | 3.22 (16.49)  | 5.08 (18.03)  | 26.17 | 18.56       |
| <i>Inference-time Control using only the base Diffusion Model</i>                              |            |               |               |               |               |               |               |       |             |
| NR                                                                                             | SD1.5      | 24.61 (30.50) | 24.19 (29.81) | 19.36 (25.64) | 17.67 (24.42) | 19.54 (25.91) | 20.24 (26.53) | 24.96 | 20.21       |
| FKC                                                                                            | SD1.5      | 33.02 (34.43) | 31.18 (33.34) | 28.80 (31.53) | 25.46 (29.63) | 22.88 (28.61) | 28.27 (31.51) | 25.44 | 20.66       |
| <b>ACE (B=5)</b>                                                                               | SD1.5      | 45.31 (41.48) | 42.50 (40.60) | 36.25 (35.20) | 32.75 (32.66) | 32.40 (33.40) | 37.84 (36.67) | 25.59 | 21.18       |
| NR                                                                                             | SD2.1      | 26.52 (31.18) | 25.76 (30.50) | 20.94 (27.24) | 18.83 (24.77) | 18.78 (25.31) | 21.04 (26.93) | 24.89 | 19.96       |
| FKC                                                                                            | SD2.1      | 39.69 (37.78) | 34.93 (35.91) | 31.98 (33.95) | 28.42 (32.07) | 24.93 (30.02) | 31.99 (33.95) | 25.27 | 20.64       |
| <b>ACE (B=5)</b>                                                                               | SD2.1      | 46.25 (42.24) | 41.04 (39.45) | 41.72 (37.96) | 38.38 (37.17) | 34.90 (34.82) | 40.46 (38.33) | 24.94 | 21.09       |
| <i>Adapter rendering methods (Requires Additional Training on new data or External Models)</i> |            |               |               |               |               |               |               |       |             |
| GLIGEN                                                                                         | SD1.4      | 38.36 (33.96) | 32.79 (29.58) | 28.67 (25.95) | 25.02 (23.88) | 26.98 (24.93) | 28.84 (26.47) | 24.91 | 20.78       |
| InstanceDiffusion                                                                              | SD1.5      | 68.24 (62.67) | 60.47 (55.75) | 59.88 (54.15) | 53.92 (49.02) | 57.14 (51.34) | 58.49 (53.12) | 25.97 | 21.90       |
| MIGC                                                                                           | SD1.4      | 66.37 (57.02) | 63.10 (54.47) | 61.27 (52.48) | 57.25 (49.49) | 59.13 (51.38) | 60.41 (52.16) | 25.39 | 21.42       |
| 3DIS                                                                                           | SD1.5      | 58.09 (52.76) | 51.48 (46.92) | 46.15 (42.46) | 40.39 (38.16) | 41.22 (38.47) | 45.23 (41.89) | 24.02 | 21.24       |

<sup>3</sup>For the image experiments, it sufficed to resample once at  $t_s = 0.3$  due to a small batchsize of  $N = 3$ .

2916

2917 A photo of a red chair and a yellow chair and a white teddy bear and a  
2918 brown dining table

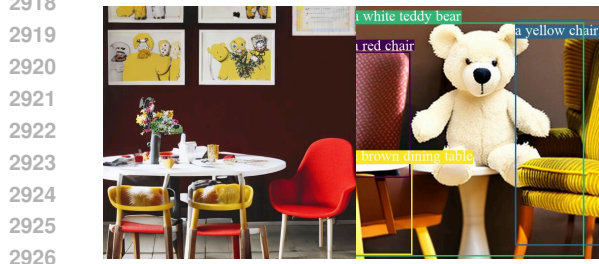

2927 A photo of a blue boat and a red boat and a white boat and a green boat

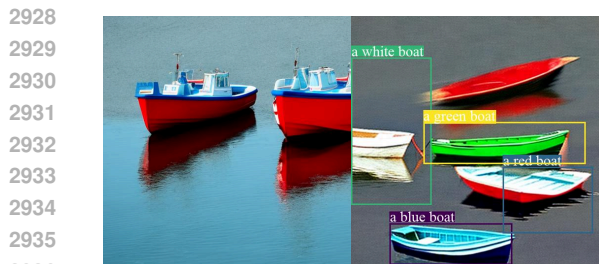

2937 A photo of a brown airplane and a red airplane and a blue airplane

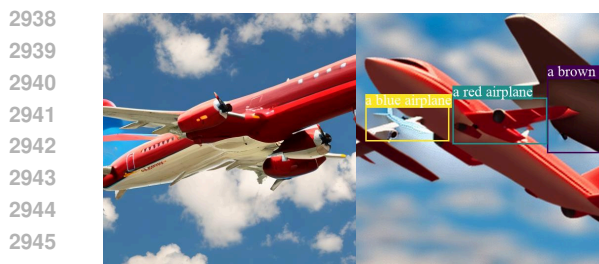

2947 A photo of a blue dog and a white bed and a green tie

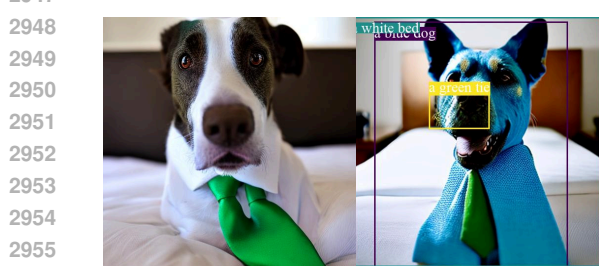

2957 A photo of a white umbrella and a red umbrella

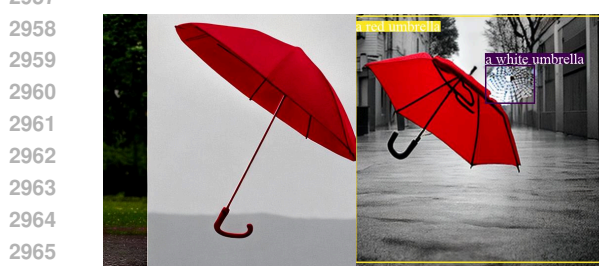

2967 Figure E.13: Qualitative results of compositional image generation with ACE. Compared to the base  
2968 Stable Diffusion 2.1 model (left), simulating the same model with ACE (right) yields better prompt  
2969 alignment and layout guidance – completely without additional training or external models.

A photo of a black cup and a black donut and a green dining table and a blue donut

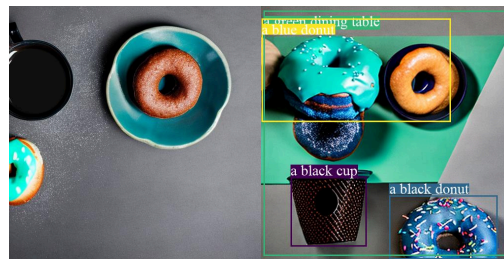

A photo of a white couch and a yellow dining table and a white oven and a brown chair

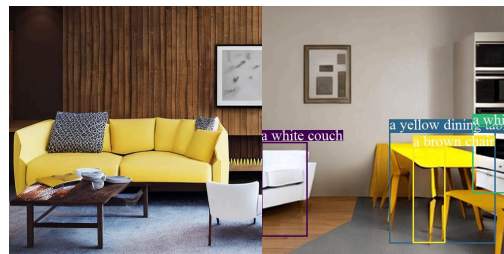

A photo of a white bird and a red boat and a blue boat

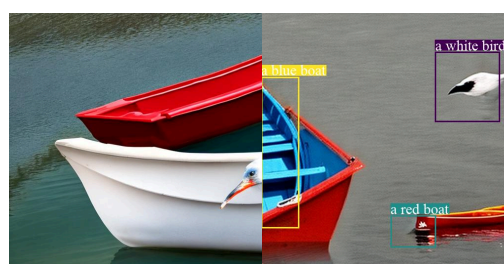

A photo of a black dog and a blue dog and a brown dog

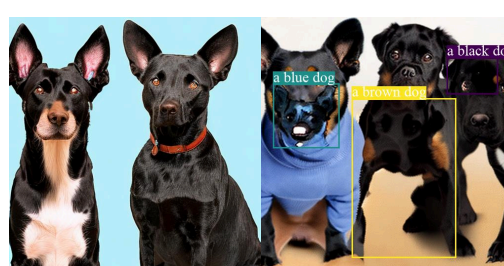

A photo of a brown boat and a brown boat and a yellow boat and a black boat and a white boat and a green boat

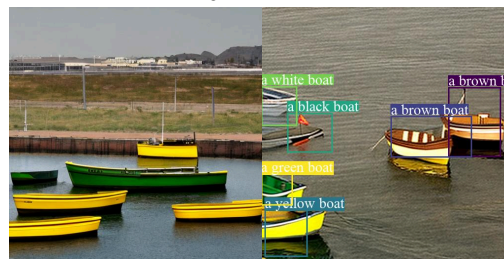

Table E.11: Runtime per image and peak GPU memory usage for generating a single image. Lower is better. Baselines were evaluated on an NVIDIA A100 GPU, whereas ACE and FKC were evaluated on an NVIDIA A6000. Since the A100 is approximately  $\times 2.3$  faster than the A6000, the raw runtime gap between ACE, FKC and baselines is narrower than it appears.

| Method            | Backbone   | Time (s) ↓ |       |       |       |       |       | VRAM (GB) ↓ |       |       |       |       |       |
|-------------------|------------|------------|-------|-------|-------|-------|-------|-------------|-------|-------|-------|-------|-------|
|                   |            | L2         | L3    | L4    | L5    | L6    | Avg   | L2          | L3    | L4    | L5    | L6    | Avg   |
| SD1.5             | SD1.5      | 1.48       | 1.48  | 1.54  | 1.52  | 1.52  | 1.51  | 2.64        | 2.64  | 2.64  | 2.64  | 2.64  | 2.64  |
| NR                | SD1.5      | 5.79       | 7.24  | 8.65  | 10.25 | 11.41 | 8.67  | 5.22        | 5.22  | 5.22  | 5.30  | 5.56  | 5.31  |
| FKC (A6000)       | SD1.5      | 14.87      | 19.14 | 23.16 | 27.11 | 30.89 | 23.04 | 3.80        | 3.80  | 3.91  | 4.38  | 4.85  | 4.15  |
| ACE (A6000)       | SD1.5      | 17.44      | 22.61 | 28.14 | 33.29 | 34.72 | 27.24 | 4.71        | 4.71  | 4.72  | 4.72  | 4.72  | 4.72  |
| SD2.1             | SD2.1      | 1.47       | 1.48  | 1.47  | 1.62  | 1.48  | 1.50  | 3.05        | 3.05  | 3.05  | 3.05  | 3.05  | 3.05  |
| NR                | SD2.1      | 5.41       | 6.51  | 7.89  | 9.43  | 10.37 | 7.93  | 6.05        | 6.05  | 6.05  | 6.13  | 6.39  | 6.13  |
| FKC (A6000)       | SD2.1      | 14.20      | 18.94 | 20.64 | 24.23 | 27.55 | 21.11 | 4.22        | 4.22  | 4.38  | 4.86  | 5.35  | 4.70  |
| ACE (A6000)       | SD2.1      | 16.53      | 21.34 | 25.82 | 30.72 | 32.19 | 23.52 | 5.12        | 5.13  | 5.13  | 5.13  | 5.13  | 5.13  |
| SDXL              | SDXL       | 3.45       | 3.36  | 3.29  | 3.36  | 3.38  | 3.37  | 8.98        | 8.98  | 8.98  | 8.98  | 8.98  | 8.98  |
| SD3.5-M           | SD3.5-M    | 4.56       | 4.55  | 4.55  | 4.55  | 4.55  | 4.55  | 17.61       | 17.61 | 17.61 | 17.61 | 17.61 | 17.61 |
| Flux.1-dev        | Flux.1-dev | 47.73      | 47.69 | 47.71 | 47.71 | 47.71 | 47.71 | 67.64       | 67.64 | 67.64 | 67.64 | 67.64 | 67.64 |
| GLIGEN            | SD1.4      | 2.61       | 2.62  | 2.62  | 2.62  | 2.61  | 2.62  | 6.01        | 6.01  | 6.01  | 6.01  | 6.01  | 6.01  |
| InstanceDiffusion | SD1.5      | 6.77       | 8.22  | 9.70  | 11.14 | 12.67 | 9.70  | 6.60        | 6.60  | 6.60  | 6.60  | 6.60  | 6.60  |
| MIGC              | SD1.4      | 2.58       | 2.58  | 2.56  | 2.57  | 2.58  | 2.57  | 5.43        | 5.43  | 5.43  | 5.43  | 5.43  | 5.43  |
| 3DIS (A6000)      | SD1.5      | 10.56      | 10.84 | 11.03 | 11.14 | 11.38 | 10.99 | 7.55        | 7.55  | 7.55  | 7.55  | 7.55  | 7.55  |

## F FUTURE DIRECTIONS FOR ACE

We conclude by outlining limitations and several promising directions for further development of the ACE framework and heterogeneous model composition, both in theory and in practice.

**Error propagation in model composition.** A natural open question concerns the propagation of errors when composing multiple expert models using ACE. In practice, does the modular composition of experts lead to error accumulation that degrades performance compared to training a single, larger network? A systematic error analysis could clarify whether modularity introduces compounding approximation error or whether the benefits of specialization dominate in practical scenarios.

**Extension to arbitrary transport.** We assumed that the stochastic interpolation is between a Gaussian and compactly supported distribution, which is a common formulation in generative modeling. However, tasks such as molecule or image editing, where a sample from the source distribution is given and the task is to transport that sample to a target distribution, require a different formulation since these models interpolate between two compactly supported distributions. Future work could explore when Marginal Path Collapse occurs in these general transport problems.

Reviewer  
gBQy

**Extension to infinite-dimensional spaces.** Our reasoning was kept as general as possible so that it may be naturally extended to infinite-dimensional settings. Viewing each data sample as a function, rather than a point in finite-dimensional space, is both theoretically appealing and practically relevant in certain generative modeling applications. For instance, by replacing  $\mu$  in definition A.1 with a Gaussian measure on a Hilbert space, one can develop a function-space analogue of ACE with direct implications for models defined over functional data.

**Practical efficiency via distillation.** A key limitation of ACE in practice is that the inference cost scales linearly with the number of experts. However, the weighted SDE/ODE formulation of theorem A.1 suggests that existing techniques for model distillation—such as consistency models, flow map matching, or efficient SDE/ODE solvers—could be adapted to mitigate this cost.

*Remark* (Distillation of Weighted SDE). The probability path  $\{p_t^*(X_t)\}_{t \in [0,1]}$ ,  $X_t \in \mathbb{R}^d$  can equivalently be simulated by solving the ODE

$$Y_0 \sim p_0^* \otimes \delta(\mathbf{1}), \quad dY_t = \left( \begin{bmatrix} v_t^* \\ g_t \end{bmatrix} \circ \pi \right) (Y_t) dt. \quad (\text{F.1})$$

where  $Y_t = \begin{bmatrix} X_t \\ \log w_t \end{bmatrix} \in \mathbb{R}^{d+1}$  and  $\pi$  projects  $Y_t$  to  $X_t$ . Applying distillation techniques to this formulation will enable efficient sampling while maintaining fidelity to the target distribution.

**Expanding modular generation to scientific frontiers.** We demonstrated ACE’s capacity to resolve path collapse in high-dimensional, multi-modal settings through the scaffold decoration task, where it successfully coordinated distinct modalities (bond topology, protein pocket, and 3D conformation). This success suggests that ACE can extend to even more complex scientific tasks, such as

Reviewer  
gBQy,  
naNy

3024 protein glue generation and fragment linking, by decomposing them into families of existing models  
3025 (de novo, conformer, and SBDD), though empirical validation on these tasks remains future work.

3026 **Optimizing exponent schedules for scientific and creative tasks.** Our current ACE schedules  
3027 use simple bump functions chosen to satisfy the path-existence criterion and, in the homogeneous  
3028 regime, to modestly increase  $C(t)$  at informative times. The COCO-MIG experiments in Ap-  
3029 pendix E.4 show that even such simple time-varying exponents can significantly improve sample  
3030 quality over both NR and FKC, despite the absence of path collapse. This suggests a promising  
3031 direction: treating the exponent schedules  $\gamma_i(t)$  themselves as objects to be optimized for down-  
3032 stream objectives such as alignment or diversity. A complementary line of work is to extend ACE to  
3033 truly heterogeneous creative pipelines that combine distinct backbones and modalities (e.g., global  
3034 image-editing models with local text-conditioned generators), where incompatible noise schedules  
3035 would otherwise induce collapse. In both cases, ACE provides the theoretical guarantees needed to  
3036 explore richer steering schemes without sacrificing validity.

3037 **Extension to hybrid process in mixed continuous-categorical domains.** As we present in E.1,  
3038 many scientific and molecular generative tasks involve data living in a product space of continu-  
3039 ous coordinates (e.g., 3D positions) and categorical variables (e.g., atom and bond types). Current  
3040 diffusion-based steering methods, including ACE, operate on continuous domains where interme-  
3041 diate densities are well defined under Gaussian interpolation. However, categorical variables do  
3042 not admit Gaussian smoothing, and thus lack a natural notion of intermediate densities or scores  
3043 along the diffusion path. This mismatch makes ratio-of-densities steering, and the study of Marginal  
3044 Path Collapse, substantially more challenging in hybrid domains. Future work could develop princi-  
3045 pled stochastic interpolants for mixed continuous–discrete representations, identify conditions under  
3046 which well-defined joint paths exist, and characterize when collapse arises in such hybrid settings.  
3047 Such an extension would enable theoretically sound steering for full molecular structures, jointly  
3048 evolving coordinates and atom/bond types, thereby broadening ACE’s applicability to richer molec-  
3049 ular generation pipelines.

3050 **A long-term vision: Towards a modular generative ecosystem.** ACE demonstrates that complex  
3051 conditional generation can be achieved through the modular composition of pretrained expert mod-  
3052 els, offering a scalable alternative to monolithic, task-specific architectures. In the long run, this  
3053 suggests a paradigm shift toward a standardized practice for generative modeling on continuous do-  
3054 mains. Instead of training a bespoke model for every novel application, the community could curate  
3055 a library of highly efficient expert models for fundamental marginal densities, composing them ad  
3056 hoc using ACE. This modular paradigm opens the door to a principled framework for the collective  
3057 intelligence of AI, where distinct models collaborate to solve complex tasks beyond the scope of  
3058 their individual training.

Reviewer  
naNy
